# Supplementary material for: Childhood Hearing Impairment in Senegal
Source: MDPI journal article supplement (doi:10.3390/genes14030562), 2023-02-23
Supplement: s1 [file s1]

**Table S1.** Distribution of the participants according to the settings across the 13 administrative regions

| Regions      | Settings             |                   |           | Total |
|--------------|----------------------|-------------------|-----------|-------|
|              | Schools for the deaf | Children hospital | Community |       |
| DAKAR        | 115                  | 33                | 35        | 183   |
| THIES        | 74                   | 0                 | 12        | 86    |
| DIOURBEL     | 12                   | 0                 | 22        | 34    |
| KAOLACK      | 34                   | 0                 | 7         | 41    |
| MATAM        | 5                    | 0                 | 5         | 10    |
| SAINT-LOUIS  | 1                    | 0                 | 4         | 5     |
| KAFFRINE     | 8                    | 0                 | 1         | 9     |
| FATICK       | 3                    | 0                 | 5         | 8     |
| TAMBA COUNDA | 0                    | 0                 | 3         | 3     |
| KOLDA        | 0                    | 0                 | 7         | 7     |
| ZIGUINCHOR   | 4                    | 0                 | 4         | 8     |
| KEDOUGOU     | 0                    | 0                 | 2         | 2     |
| LOUGA        | 6                    | 0                 | 4         | 10    |
| Total        | 262                  | 33                | 111       | 406   |

**Figure S1.** 103 Pedigrees of ascertained families segregating Hearing Impairment

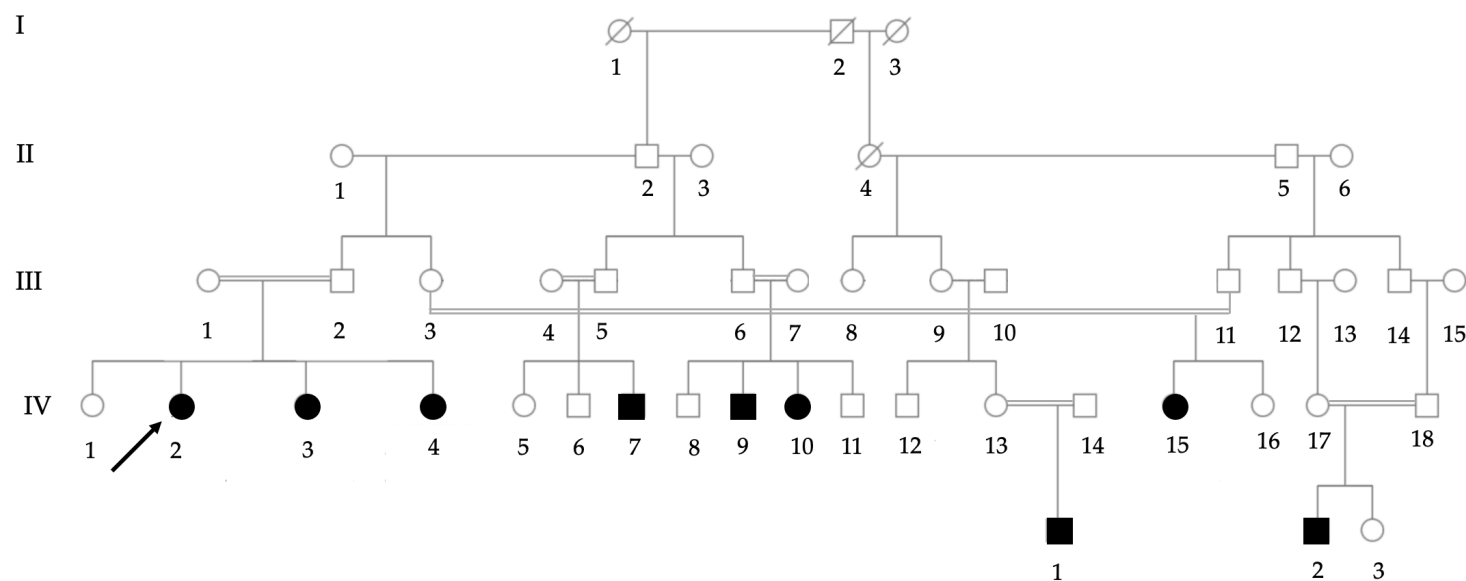

**Family1.** Showing nine affected individuals from consanguineous marriages segregating autosomal recessive non-syndromic hearing impairment.

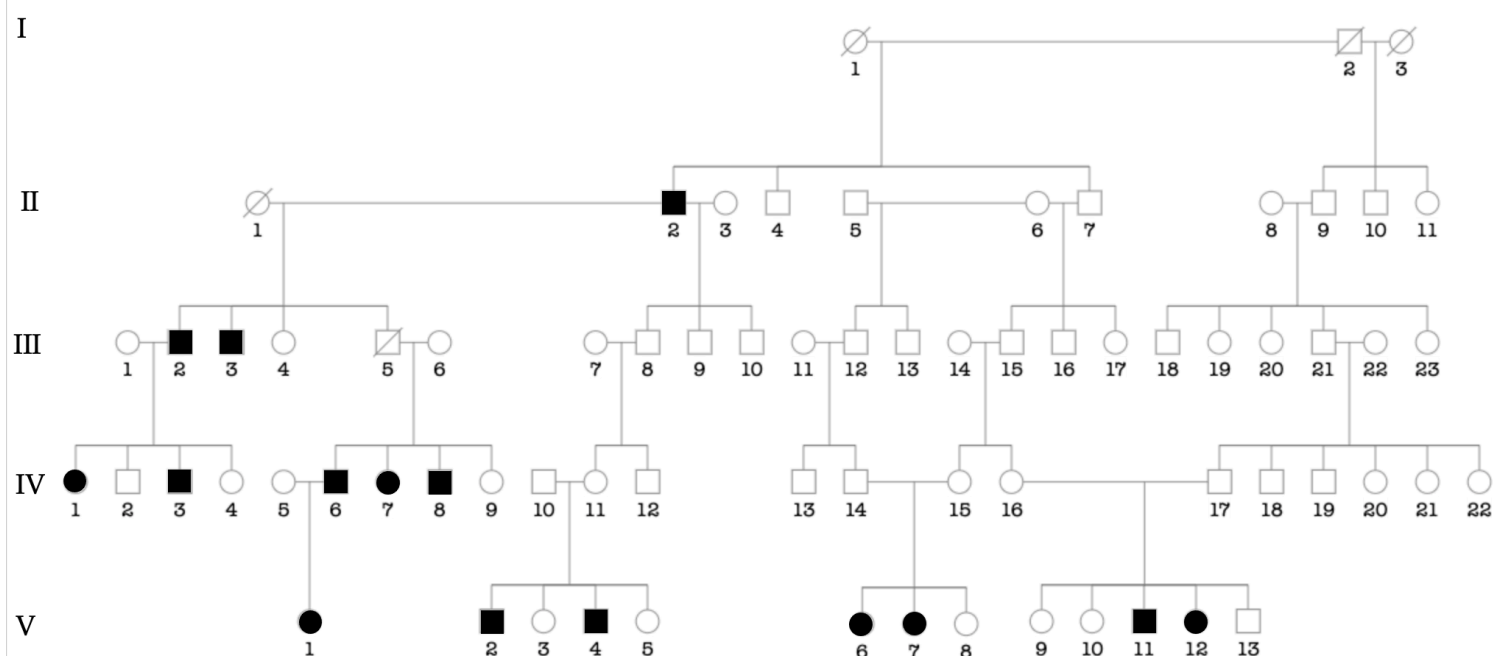

**Family2.** Showing fifteen affected individuals from consanguineous marriages segregating autosomal recessive non-syndromic hearing impairment.

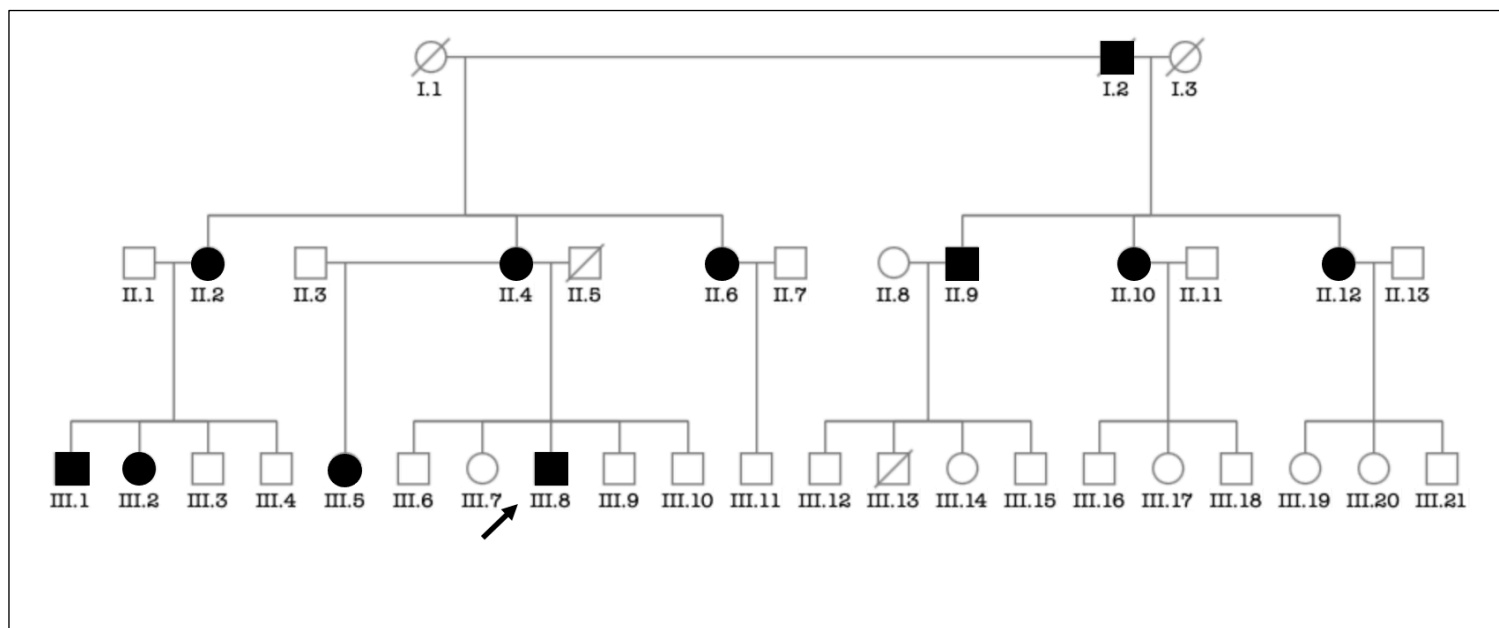

**Family3.** Showing eleven affected individuals segregating autosomal dominant post lingual hearing impairment.

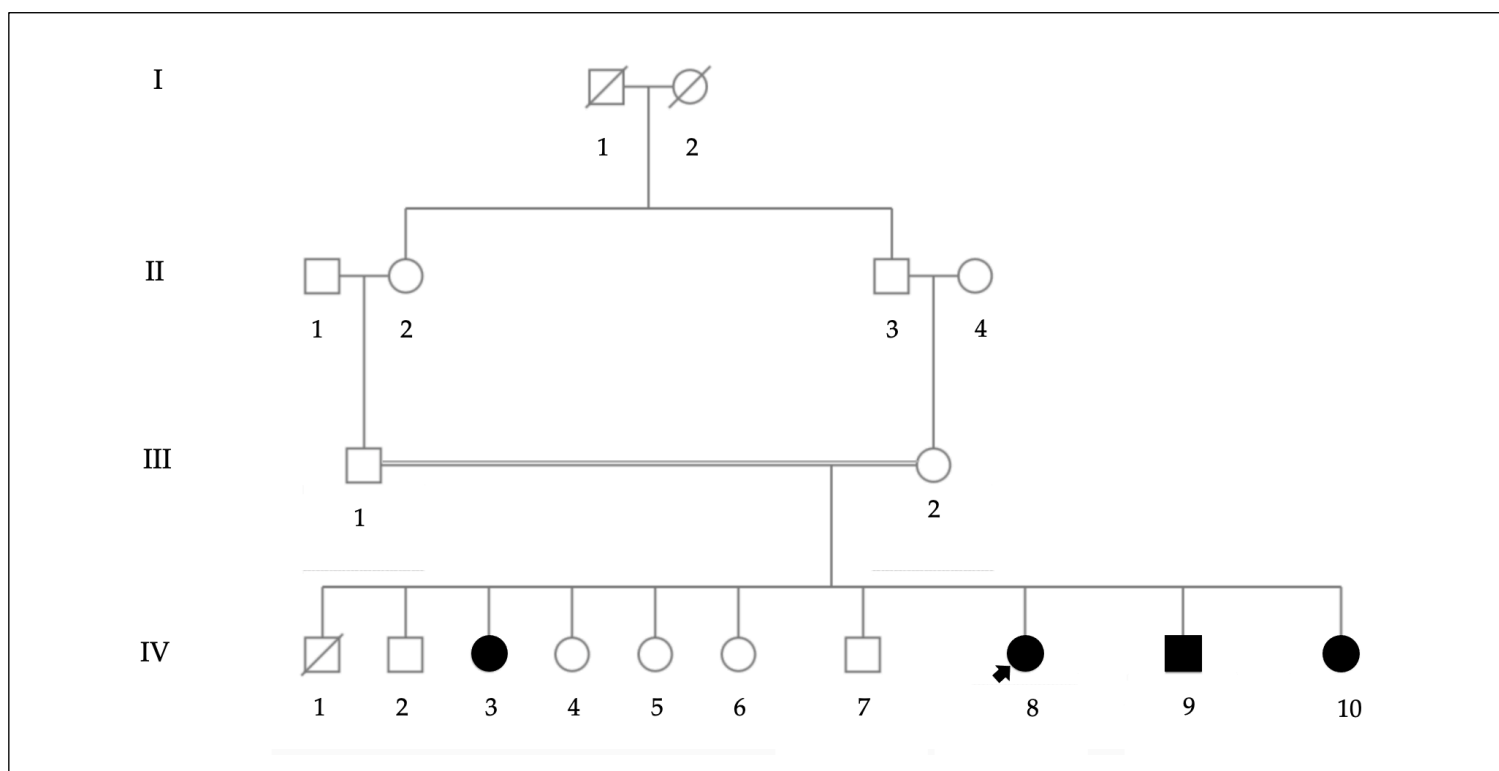

**Family4.** Showing four affected individuals from a consanguineous marriage segregating autosomal recessive non-syndromic hearing impairment

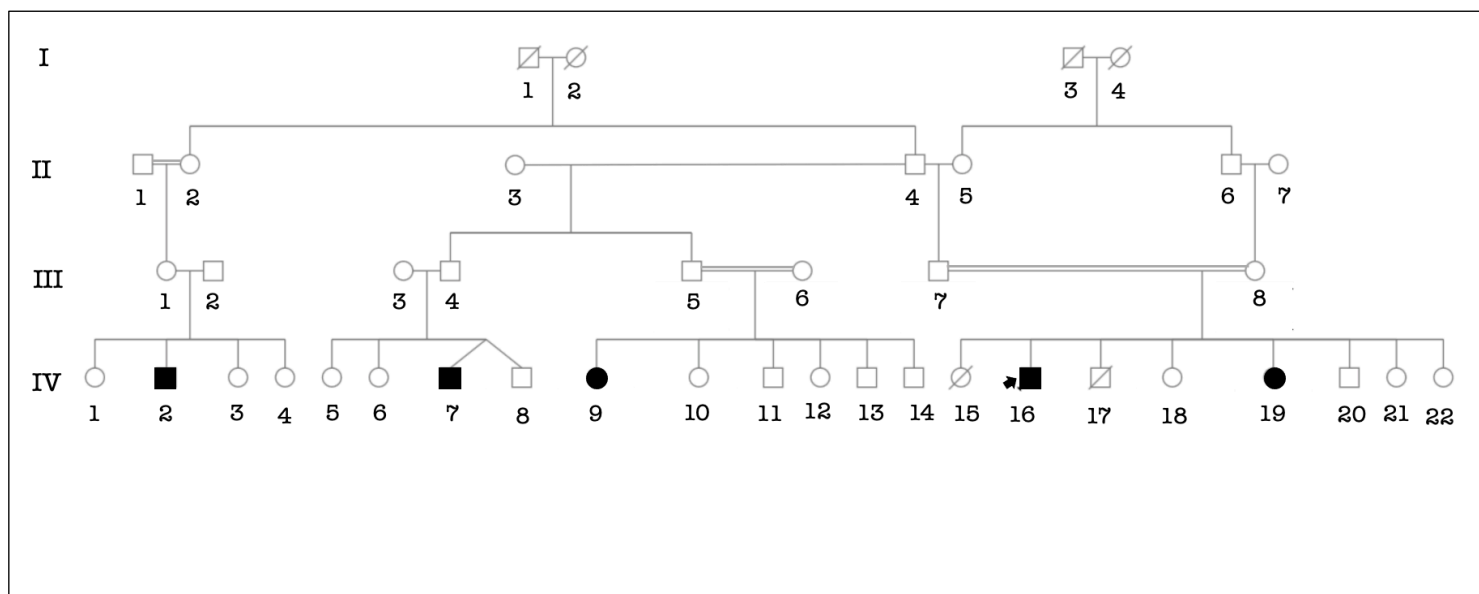

**Family5.** Showing five affected individuals from two consanguineous families and two affected individuals from non-consanguineous marriages.

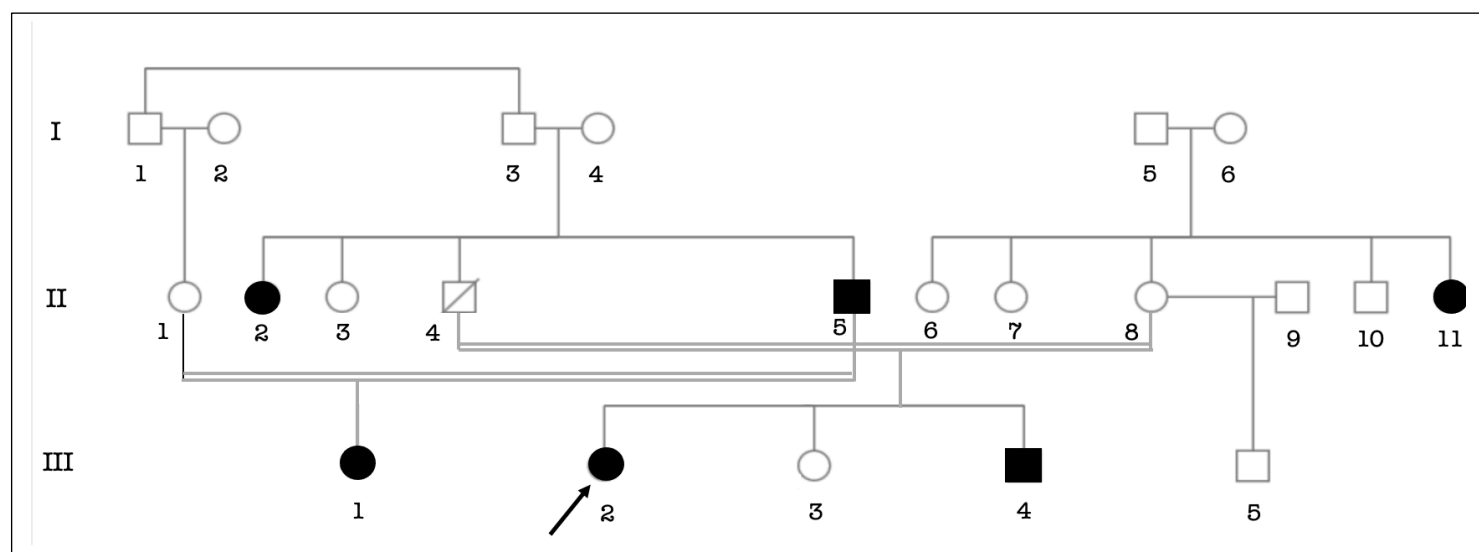

**Family6.** Showing six affected individuals from consanguineous marriages segregating autosomal recessive non syndromic hearing impairment.

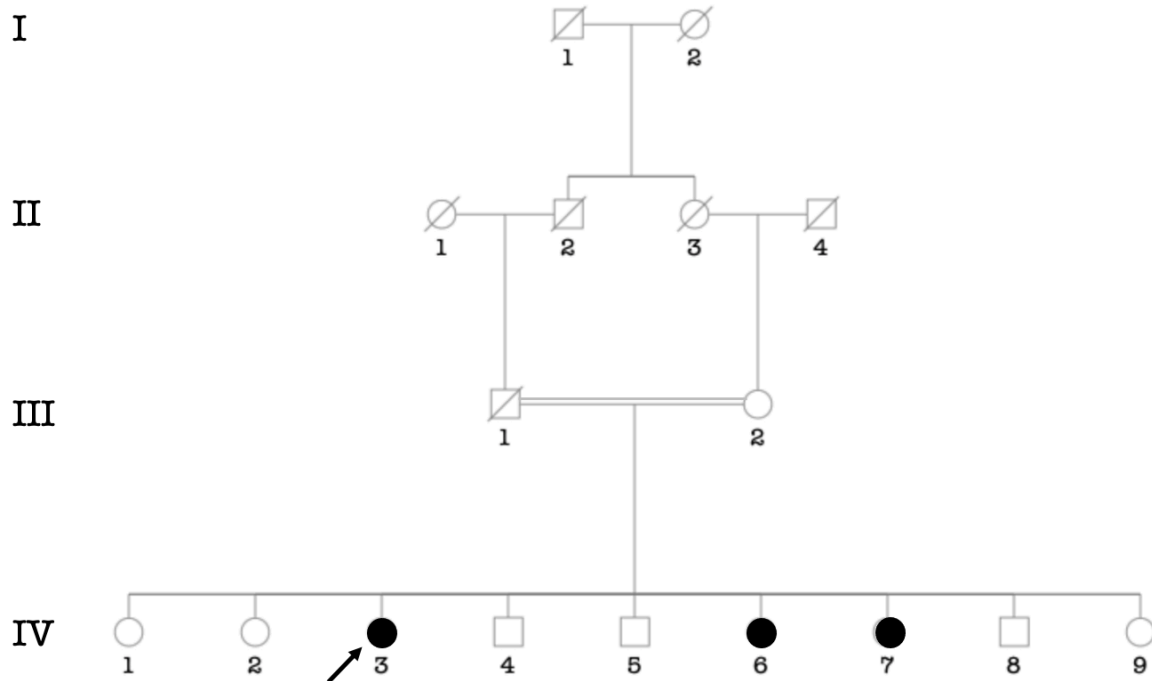

**Family7.** Showing three affected individuals from a consanguineous marriage segregating autosomal recessive non-syndromic

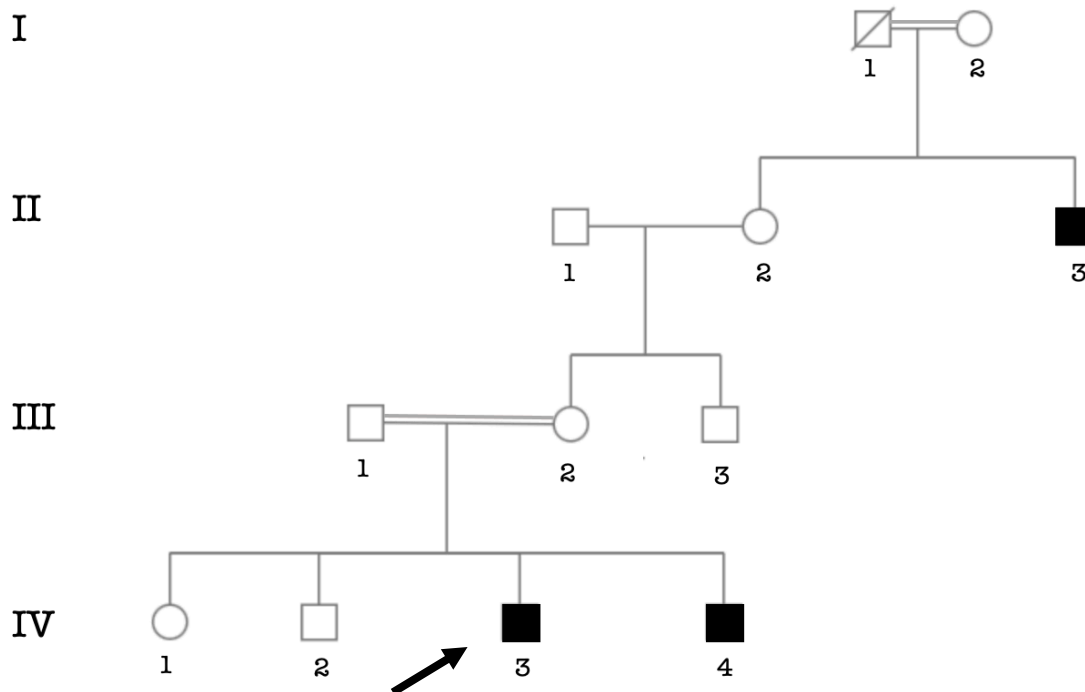

**Family8.** Showing three affected individuals from consanguineous marriages segregating recessive X-linked non-syndromic hearing impairment.

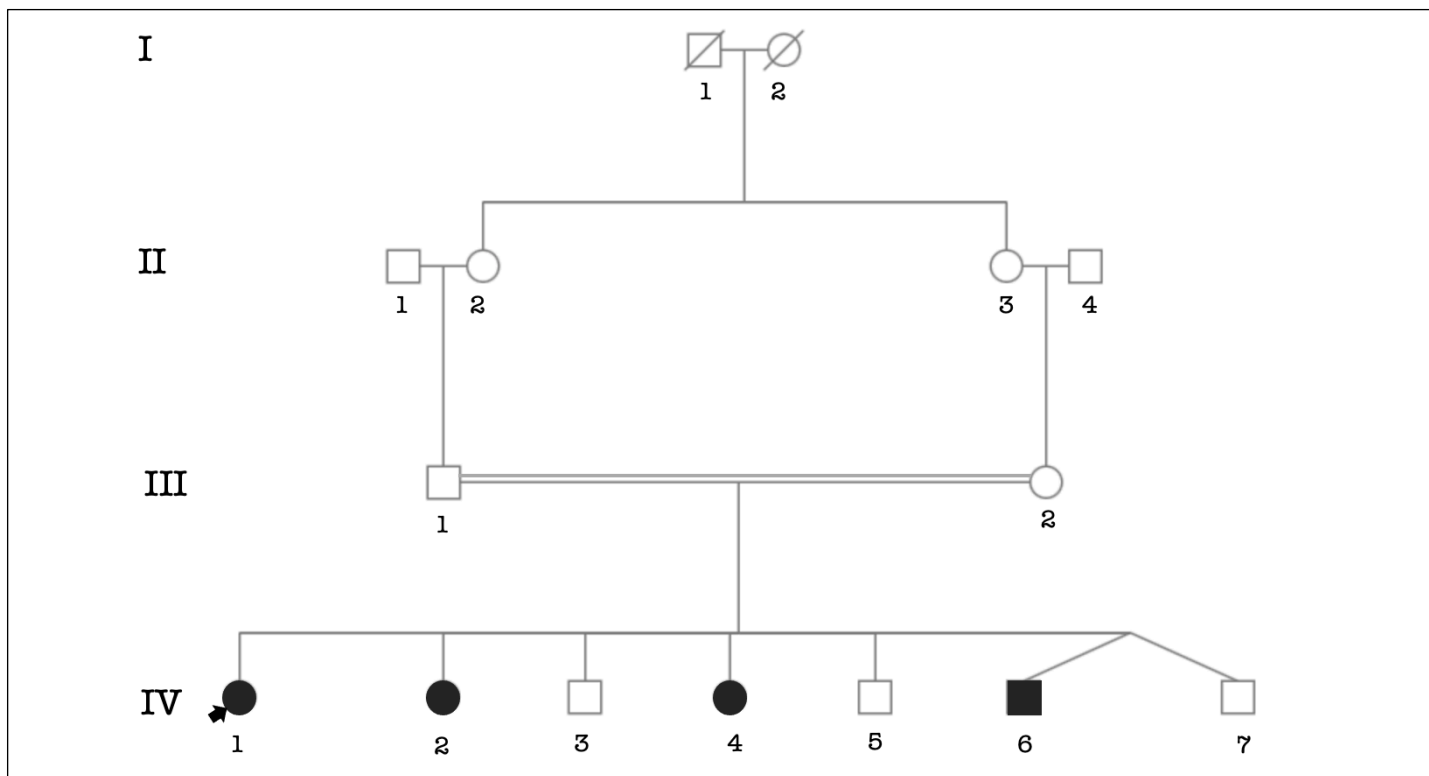

**Family9.** Showing four affected individuals from a consanguineous marriage segregating autosomal recessive non-syndromic hearing impairment.

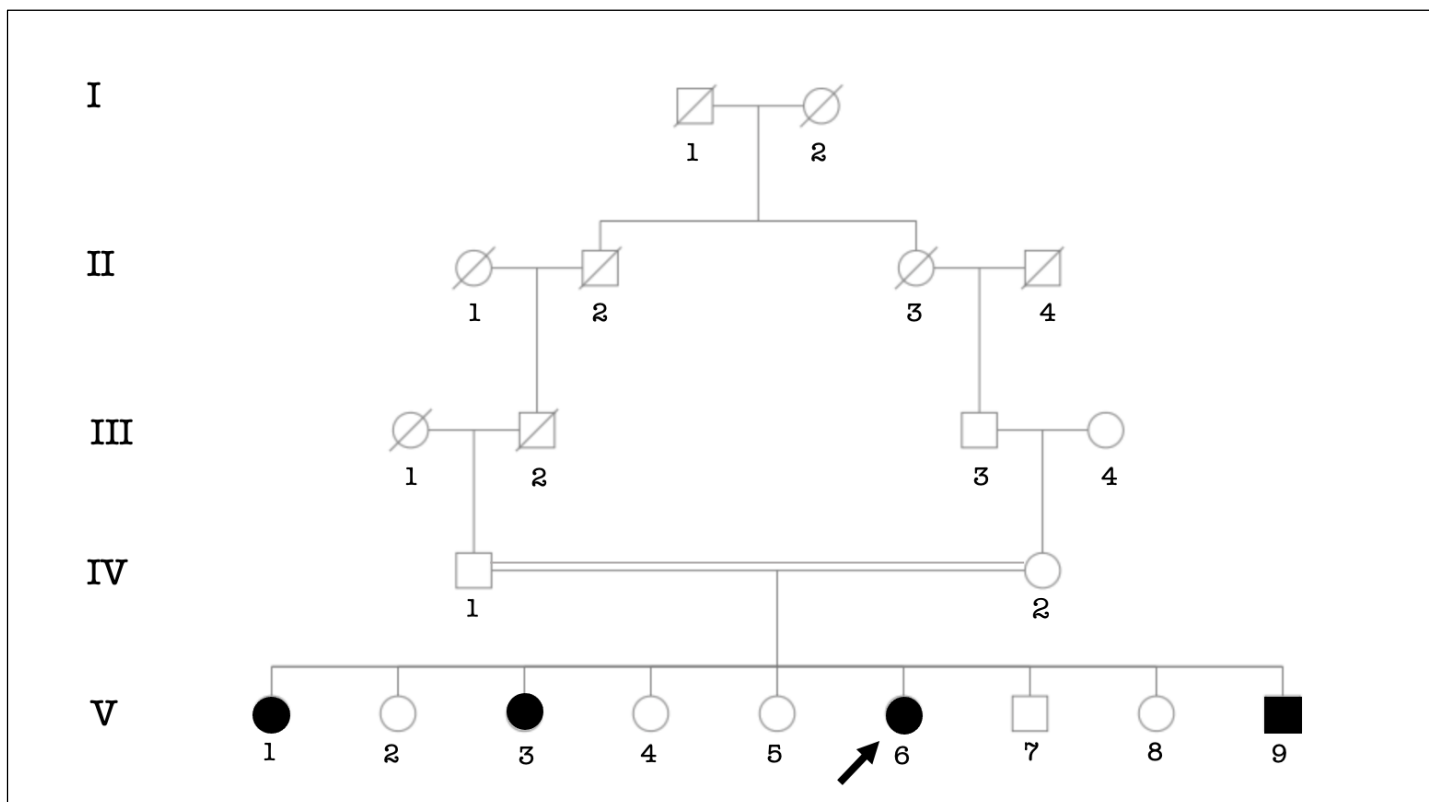

**Family10.** Showing four affected individuals from a consanguineous marriage segregating autosomal recessive non-syndromic hearing impairment

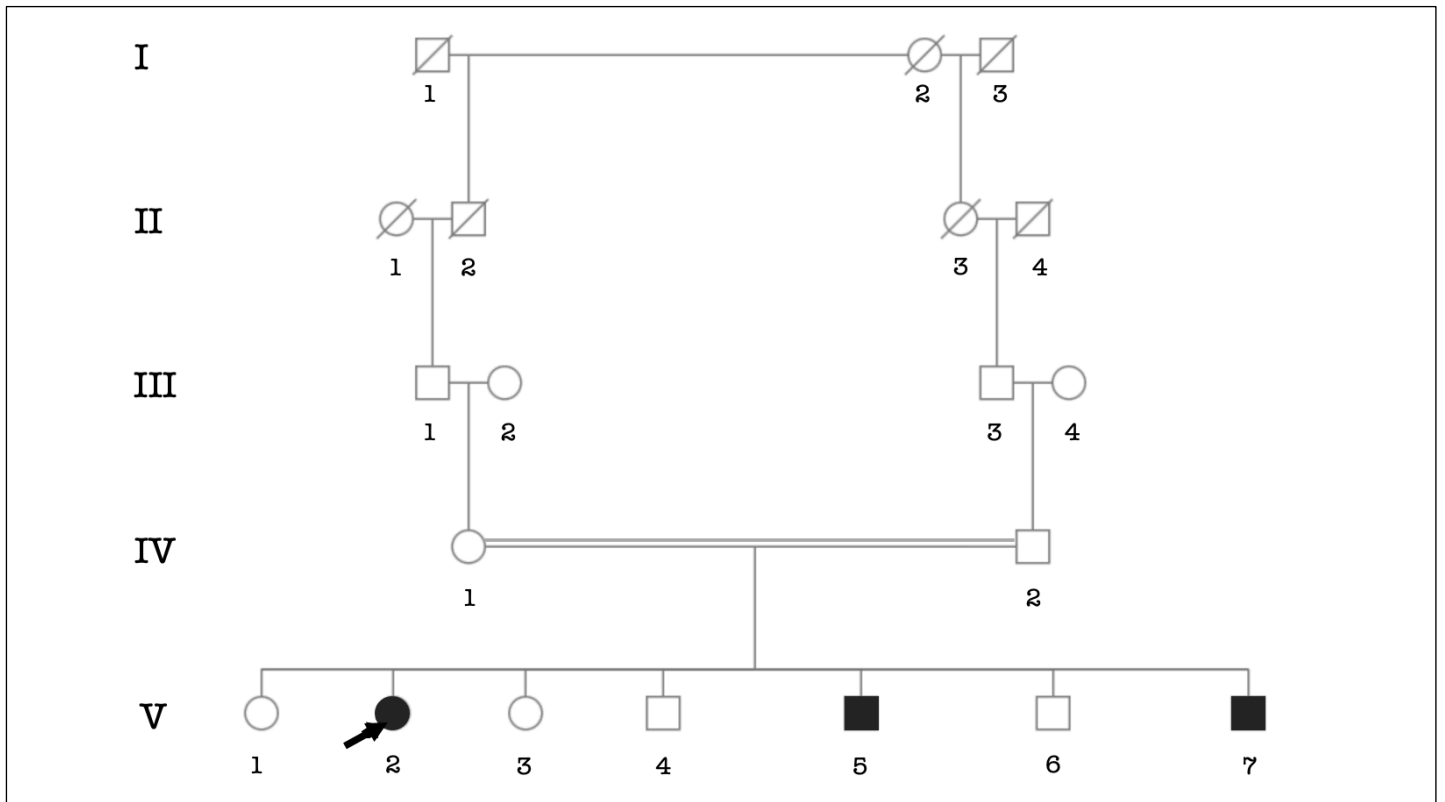

**Figure11.** Showing three affected individuals from a consanguineous marriage segregating autosomal recessive non-syndromic hearing impairment.

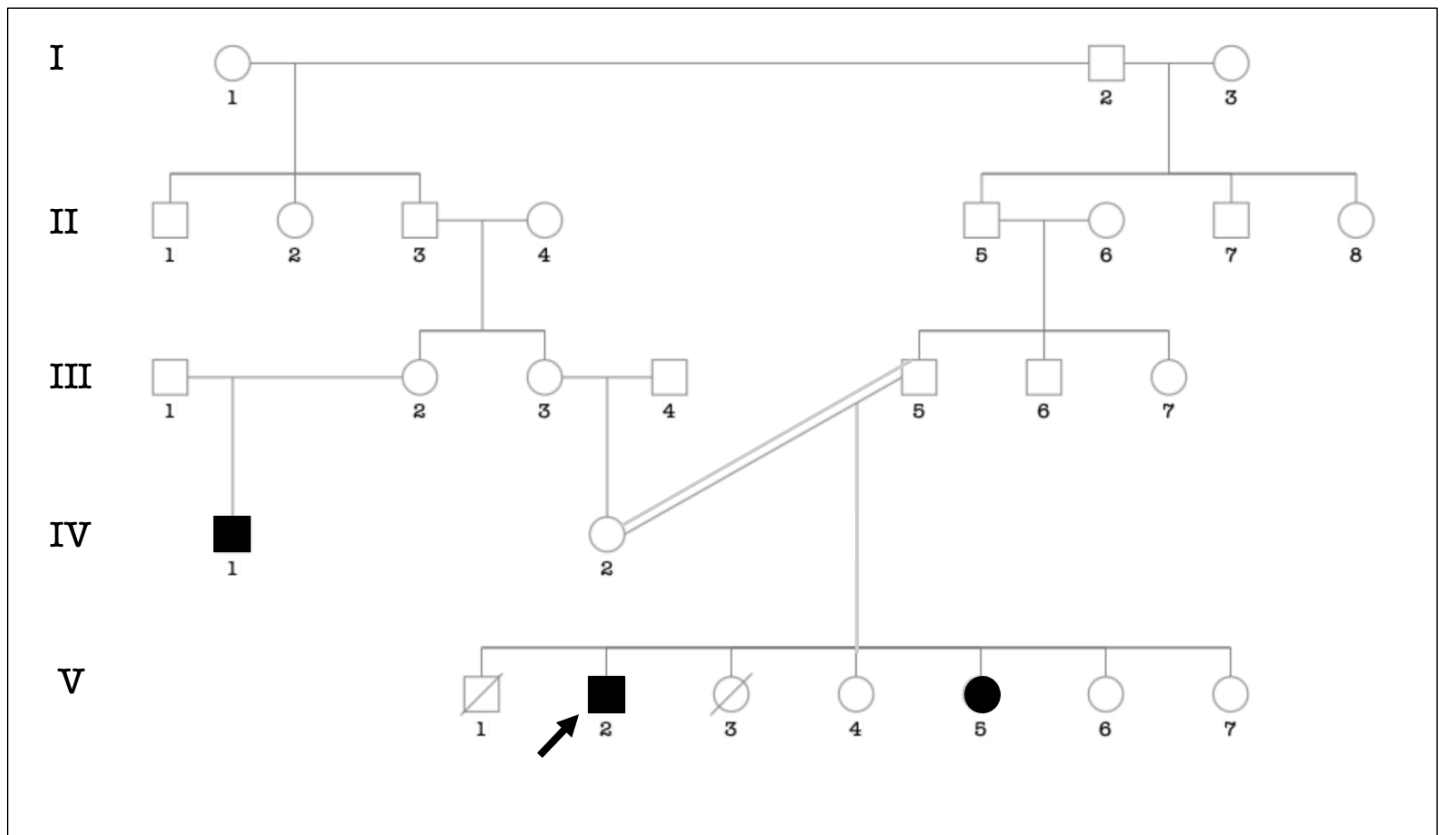

**Family12.** Showing three affected individuals from consanguineous marriages segregating autosomal recessive non-syndromic hearing impairment.

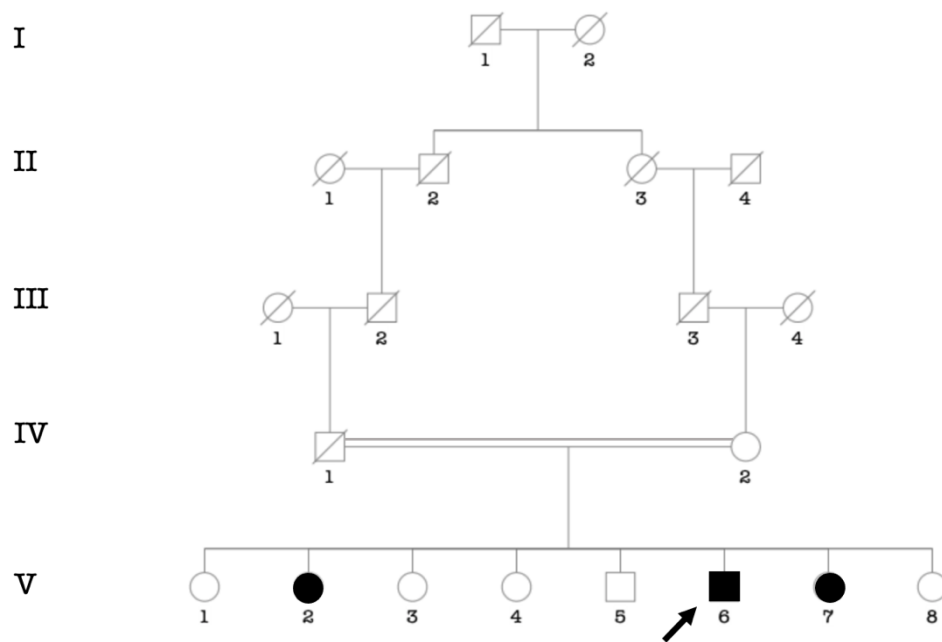

**Family13.** Showing three affected individuals from a consanguineous marriage segregating autosomal recessive non-syndromic hearing impairment.

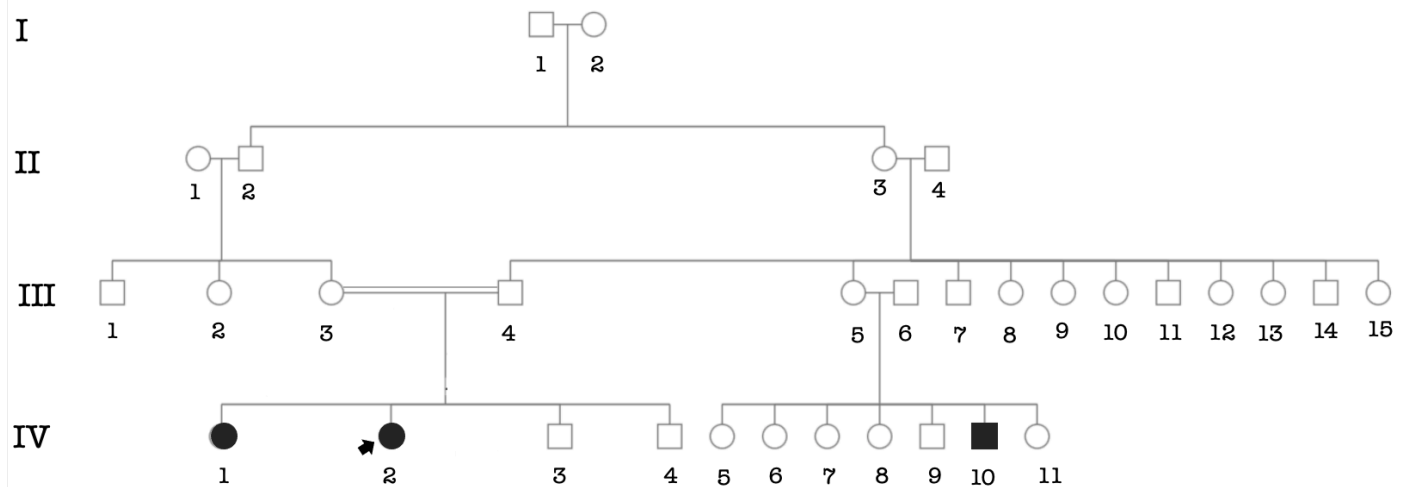

**Family14.** Showing three affected individuals segregating autosomal recessive non-syndromic hearing impairment.



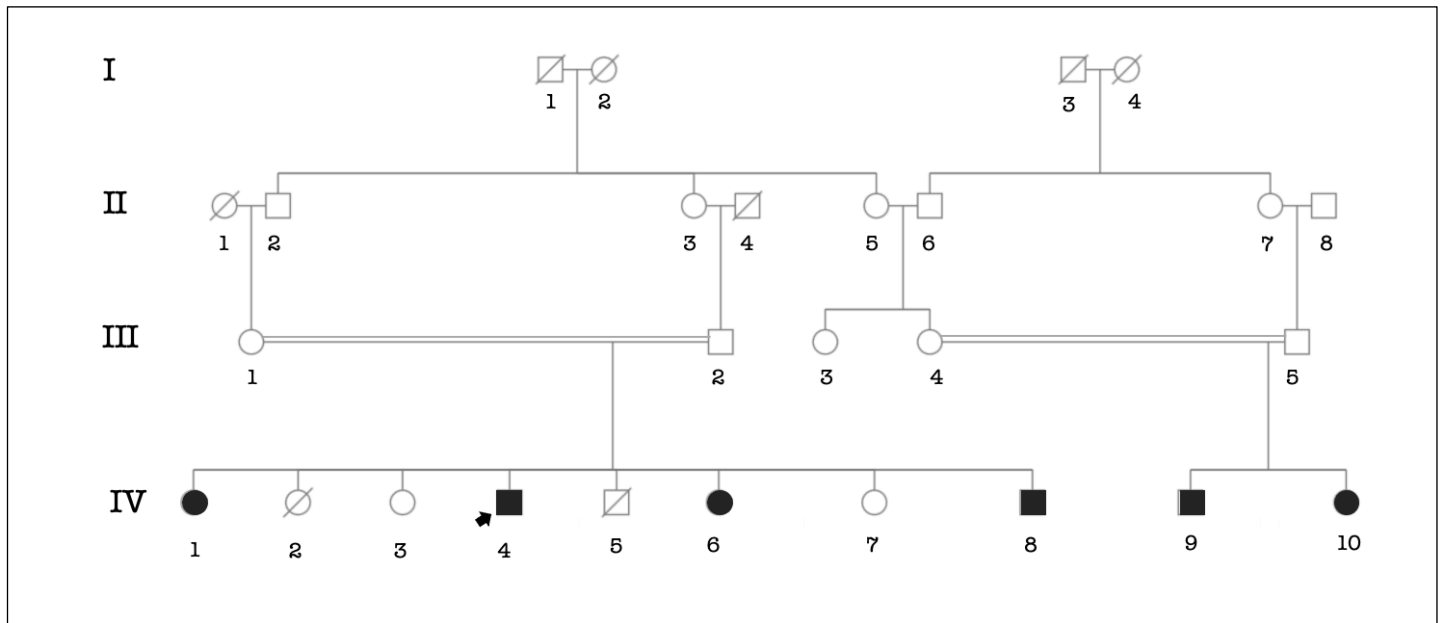

**Family15.** Showing six affected individuals from consanguineous marriages segregating autosomal recessive non-syndromic hearing impairment.

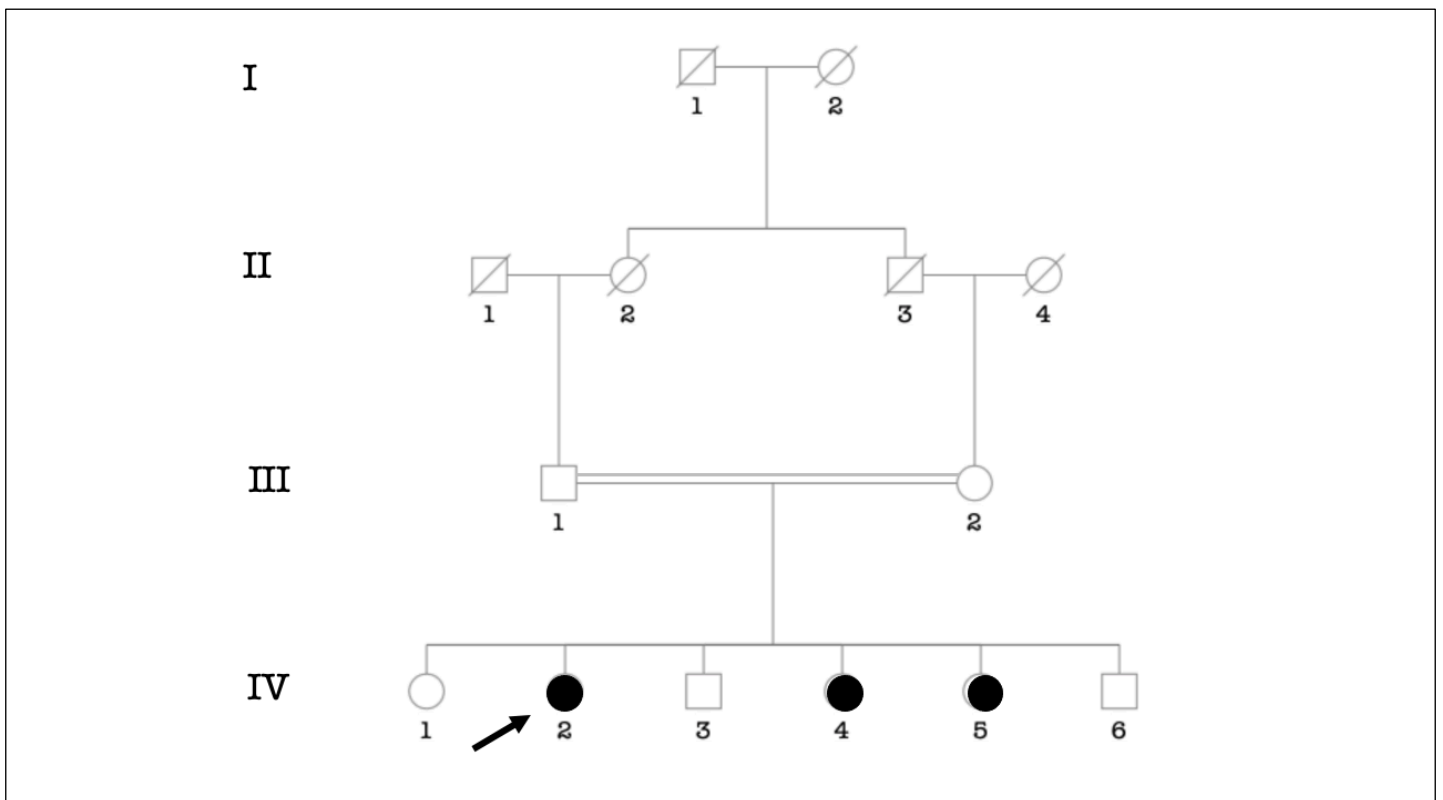

**Family16.** Showing three affected individuals from a consanguineous marriage segregating autosomal recessive non-syndromic hearing impairment.

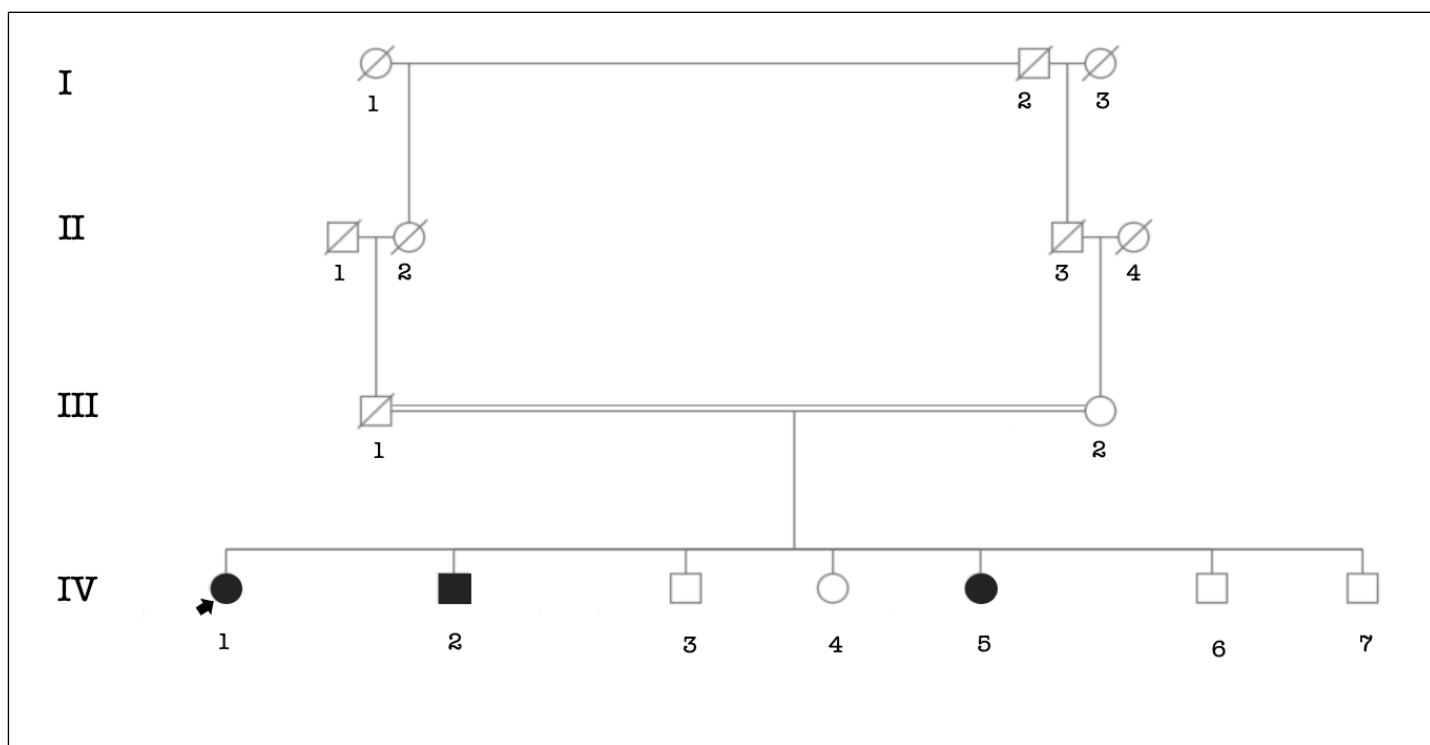

**Family17.** Showing three affected individuals from a consanguineous marriage segregating autosomal recessive non-syndromic hearing impairment.

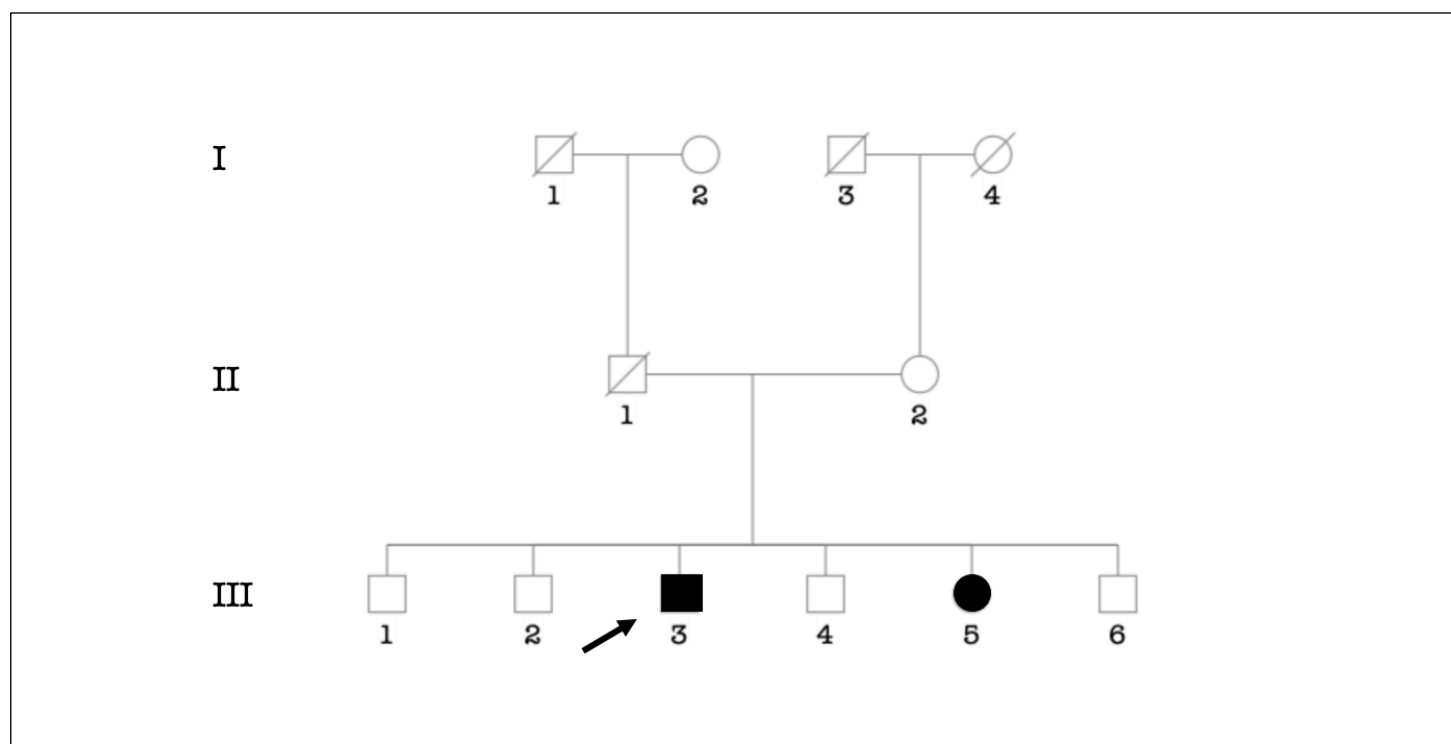

**Family18.** Showing two affected individuals from a non-consanguineous marriage segregating autosomal recessive non-syndromic hearing impairment.

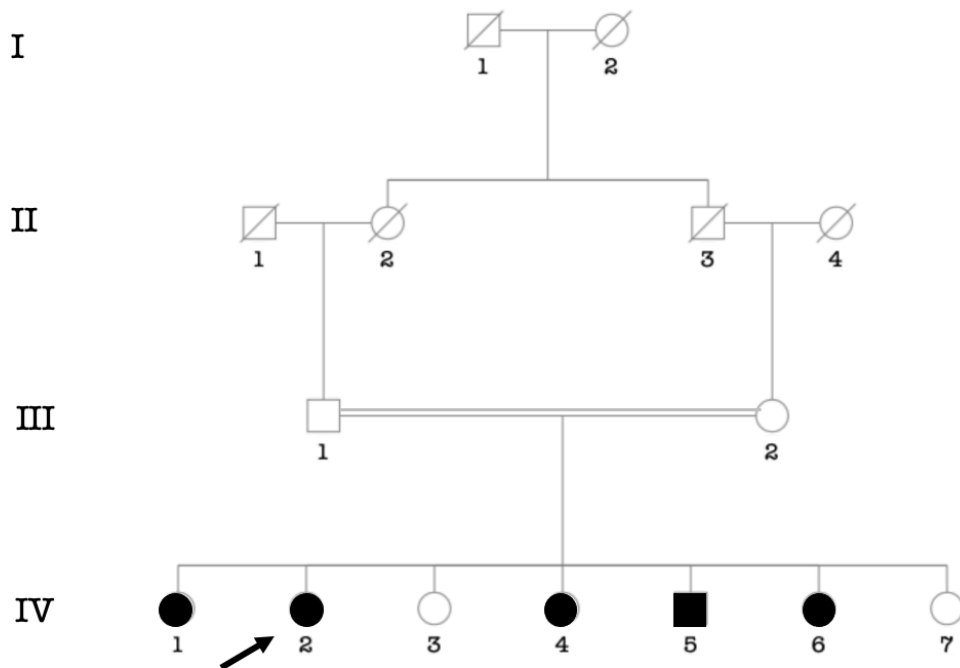

**Family19.** Showing five affected individuals from a consanguineous marriage segregating autosomal recessive non-syndromic hearing impairment.

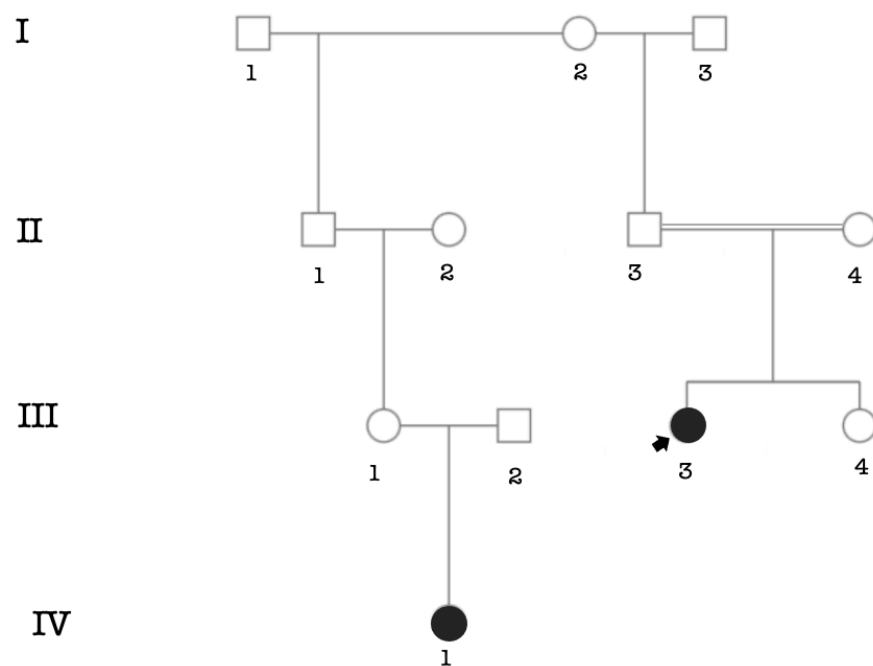

**Family20.** Showing two affected individuals segregating autosomal recessive non-syndromic hearing impairment.

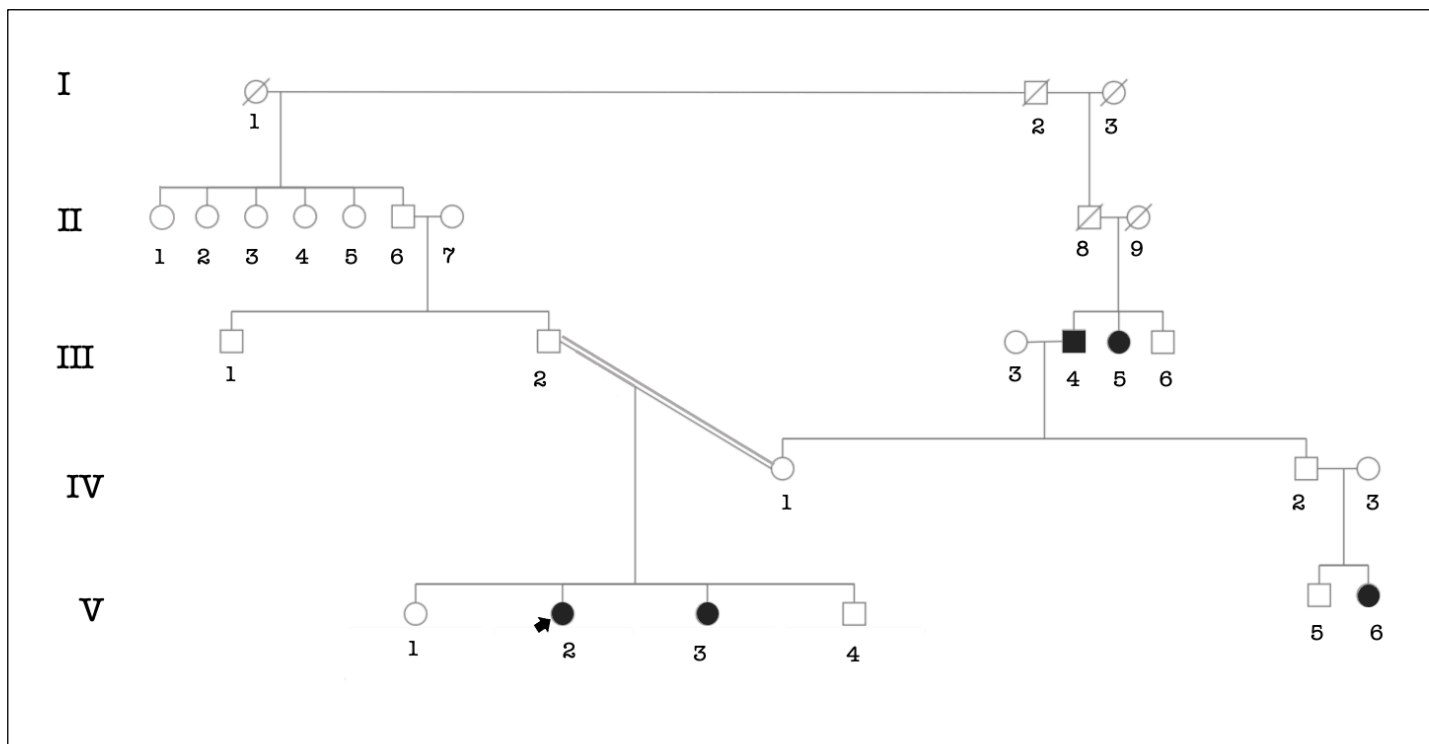

**Family21.** Showing five affected individuals segregating autosomal recessive non-syndromic hearing impairment.

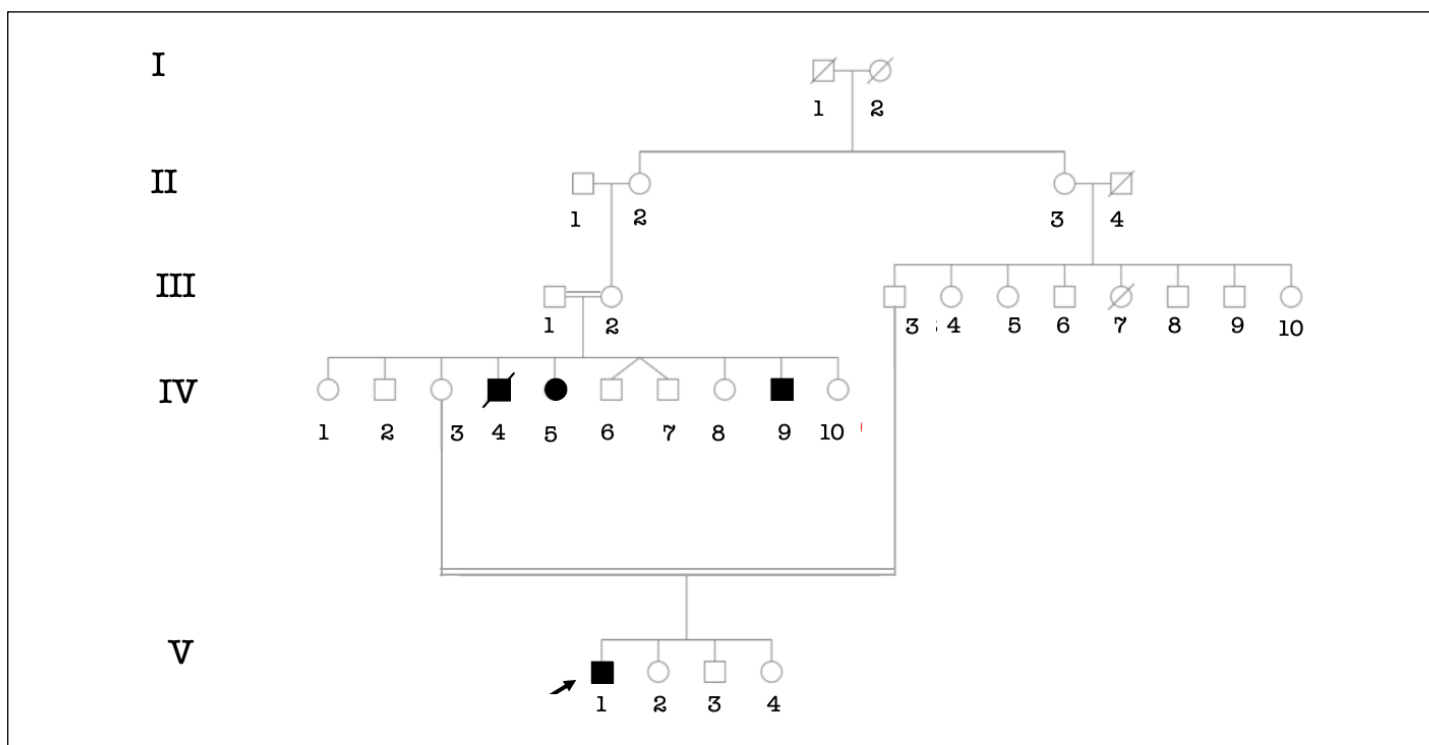

**Family22.** Showing four affected individuals from consanguineous marriages segregating autosomal recessive non-syndromic hearing impairment.

I

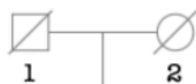

II

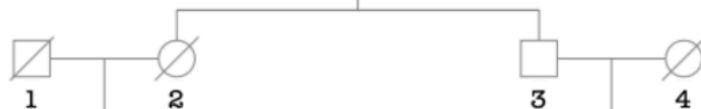

III

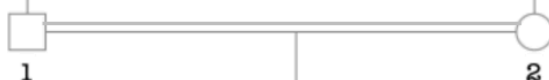

IV

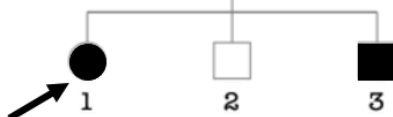

**Family23.** Showing two affected individuals from a consanguineous marriage segregating autosomal recessive non-syndromic hearing impairment

I

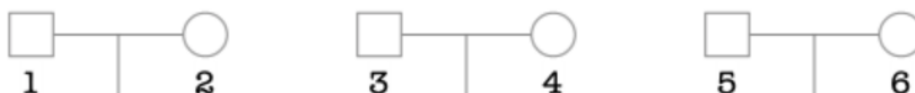

II

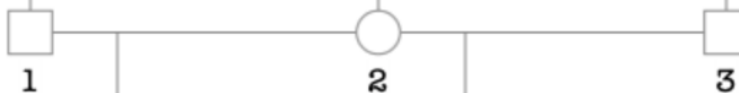

III

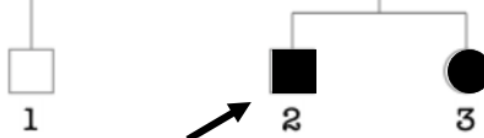

**Family24.** Showing two affected individuals from a non-consanguineous marriage segregating autosomal recessive non-syndromic hearing impairment

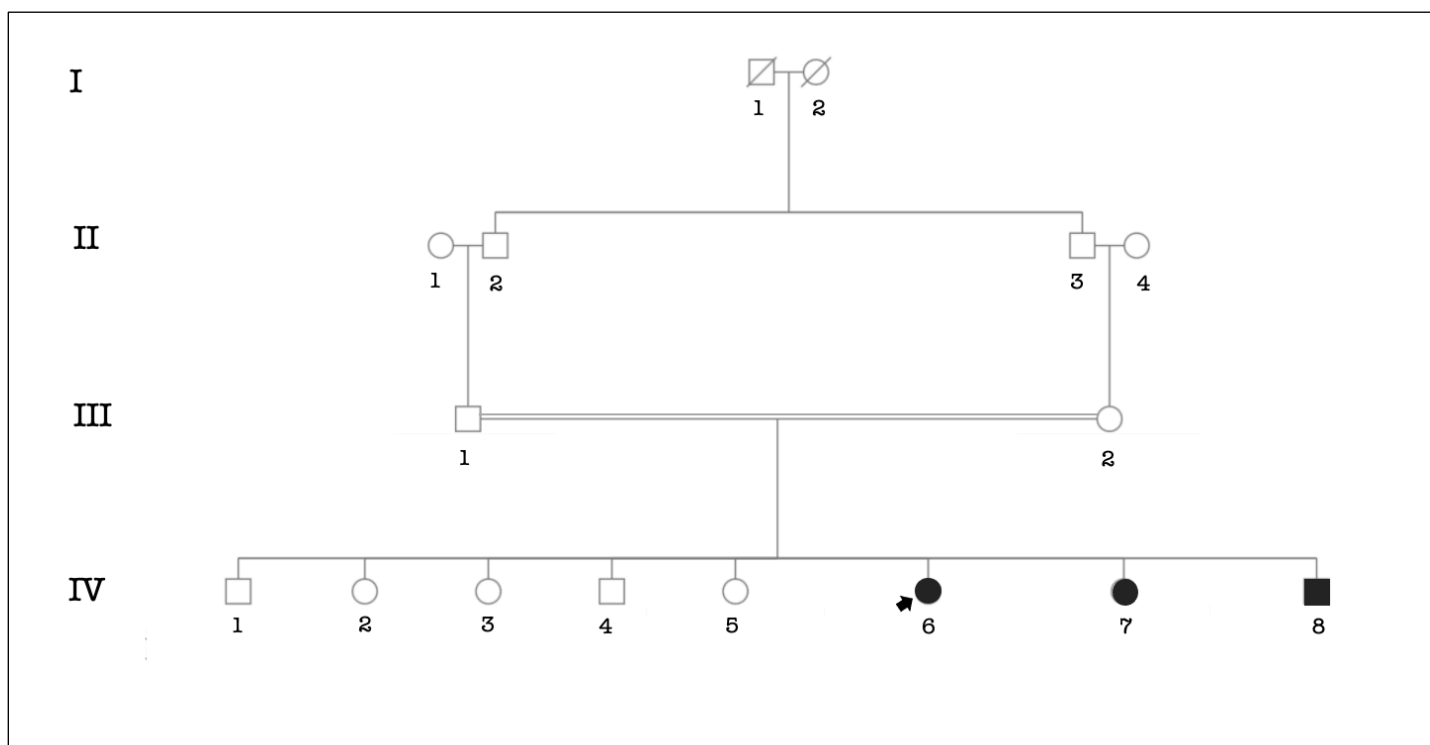

**Family25.** Showing three affected individuals from a consanguineous marriage segregating autosomal recessive non-syndromic hearing impairment.

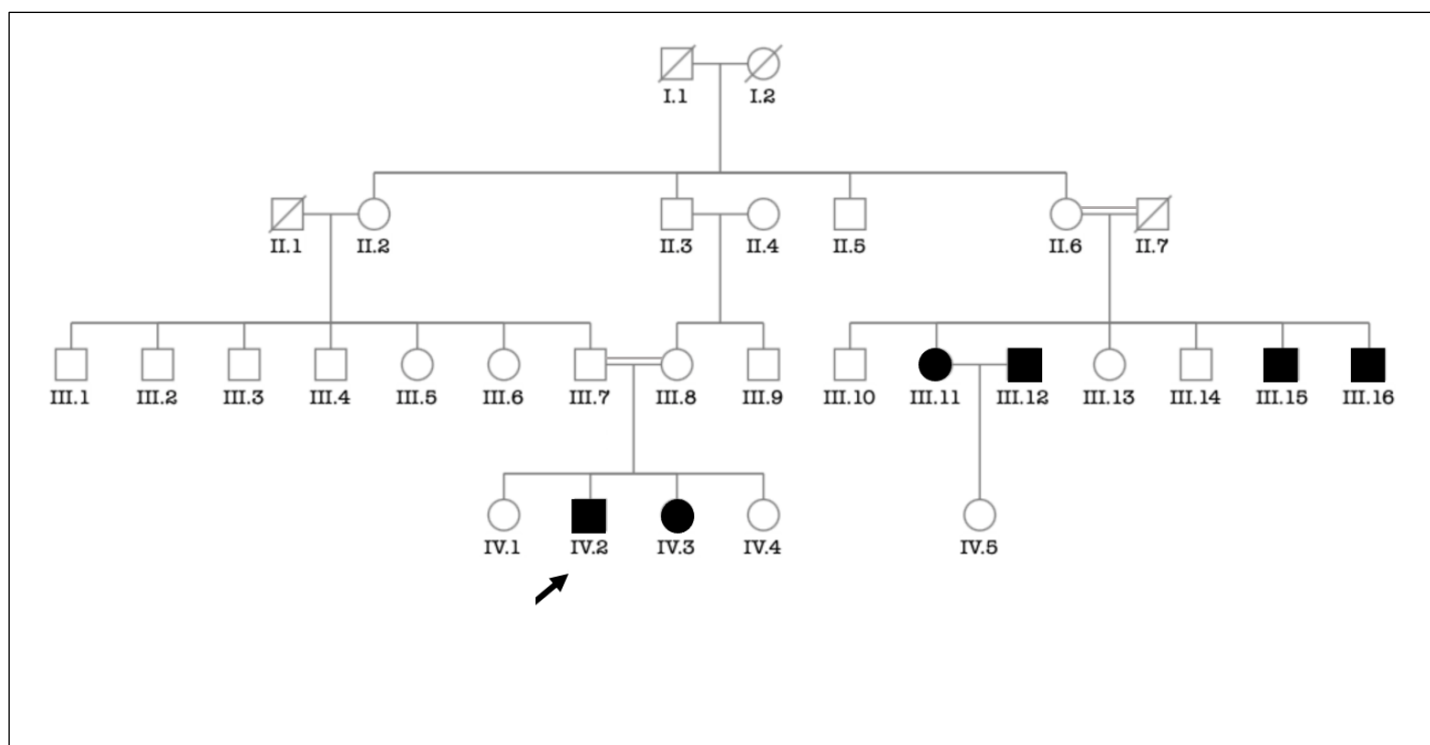

**Family26.** Showing six affected individuals from consanguineous marriages segregating autosomal recessive non-syndromic hearing impairment.

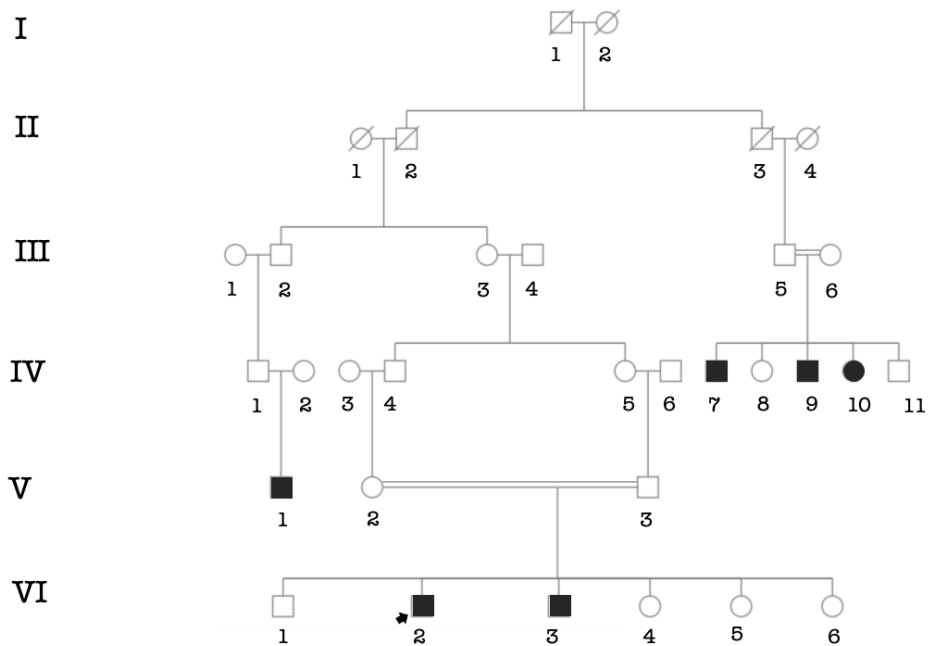

**Family27.** Showing six affected individuals from consanguineous marriage segregating autosomal recessive non-syndromic hearing impairment.

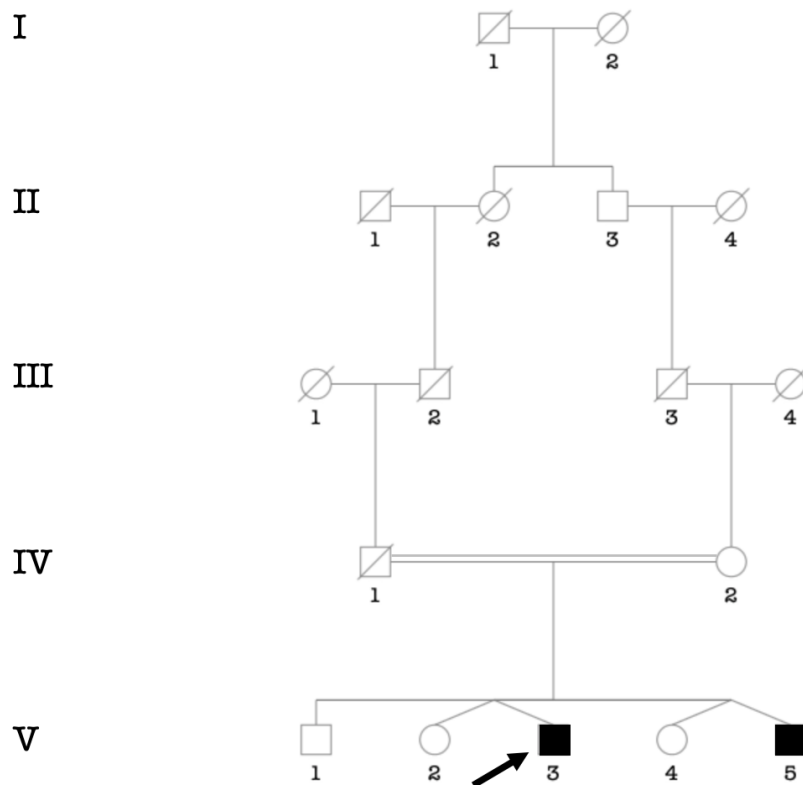

**Family28.** Showing two affected brothers from a consanguineous marriage segregating autosomal recessive non-syndromic hearing impairment

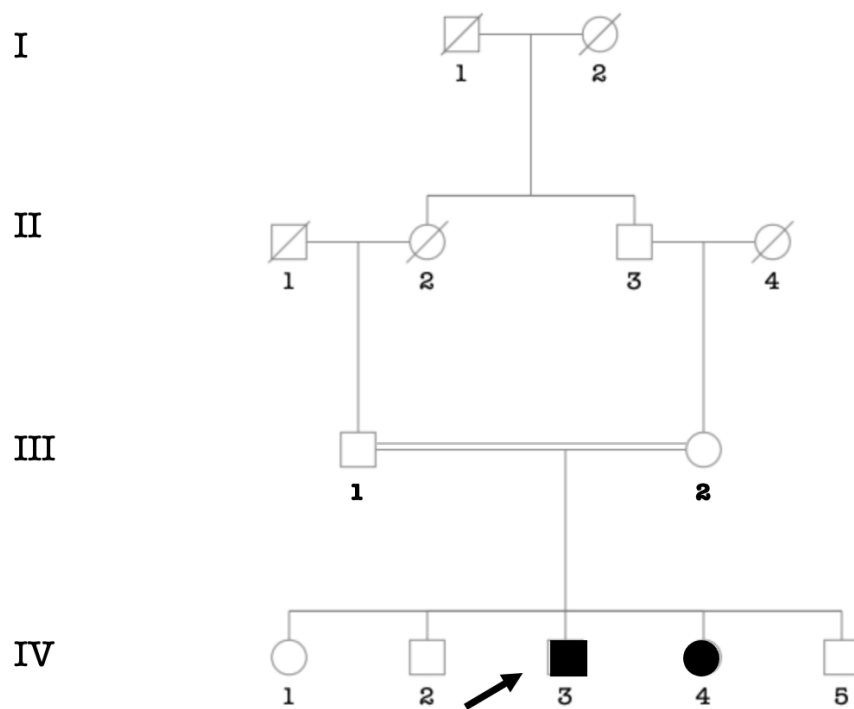

**Family29.** Showing two affected individuals from a consanguineous marriage segregating autosomal recessive non-syndromic hearing impairment.

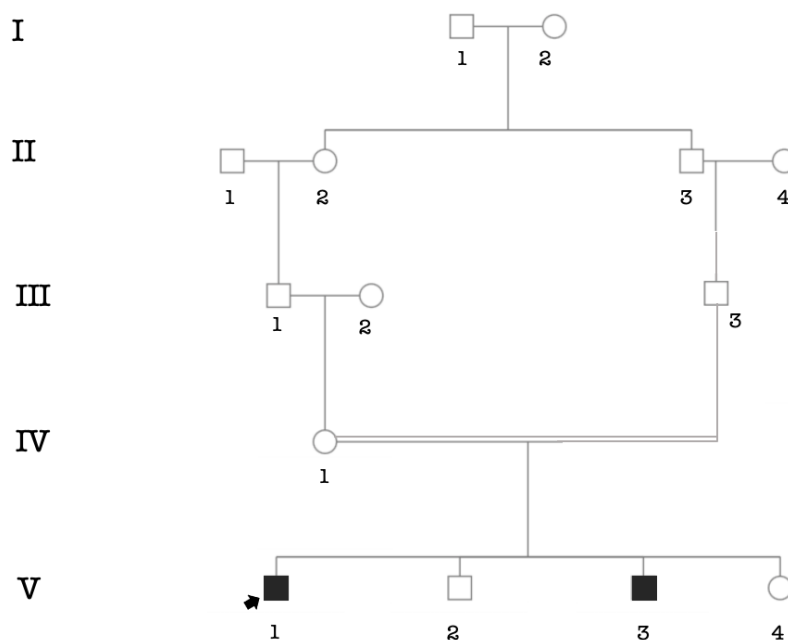

**Family30.** Showing two affected individuals from a consanguineous marriage segregating likely autosomal recessive non-syndromic hearing impairment.



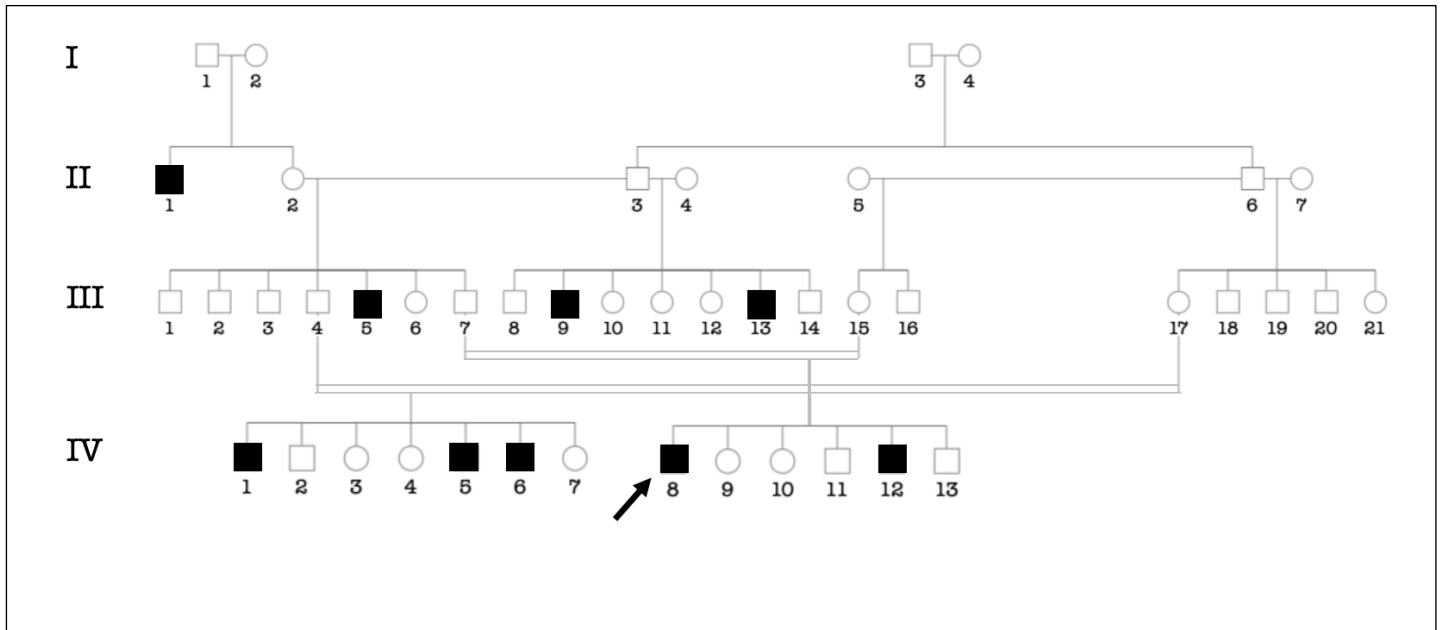

**Family31.** Showing nine affected boys segregating recessive X-linked non-syndromic hearing impairment.

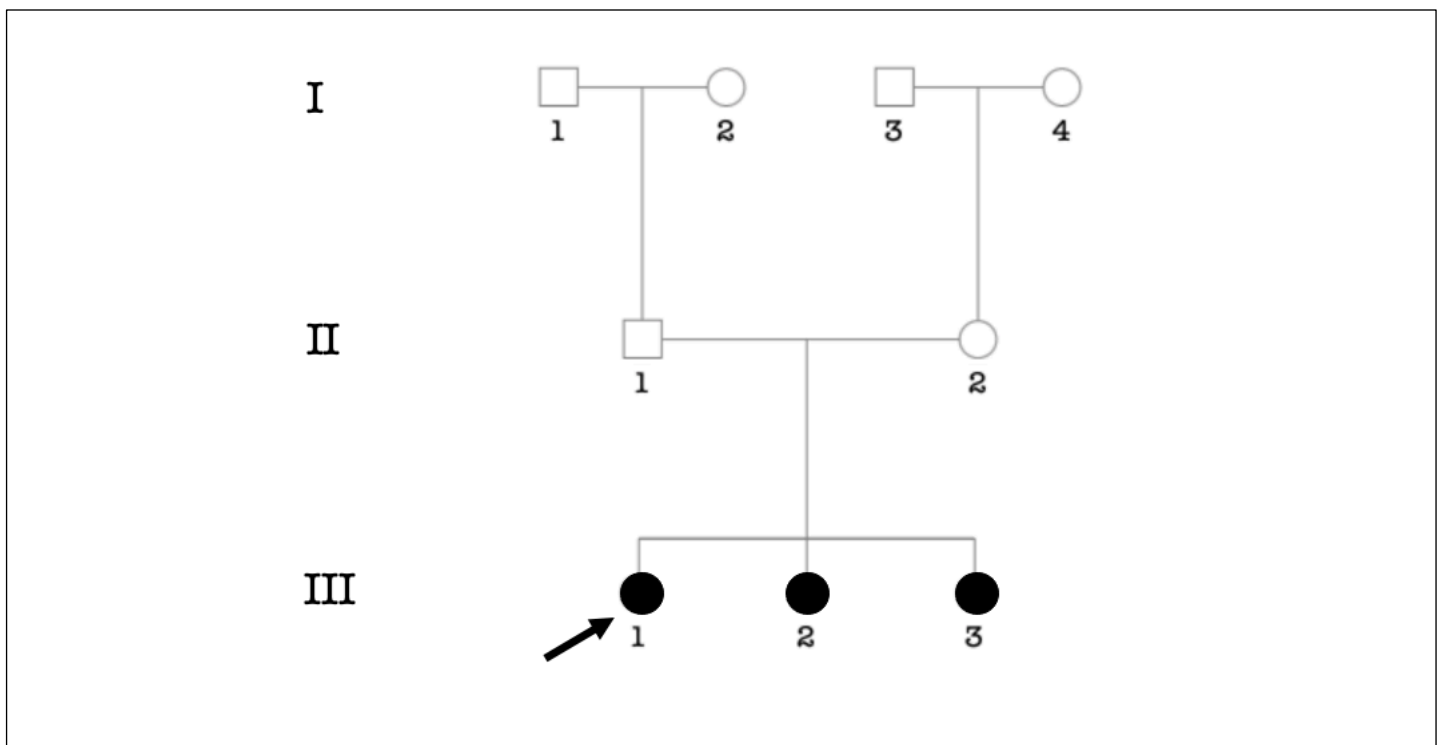

**Family32.** Showing three affected girls from a non-consanguineous marriage segregating autosomal recessive non-syndromic hearing impairment.

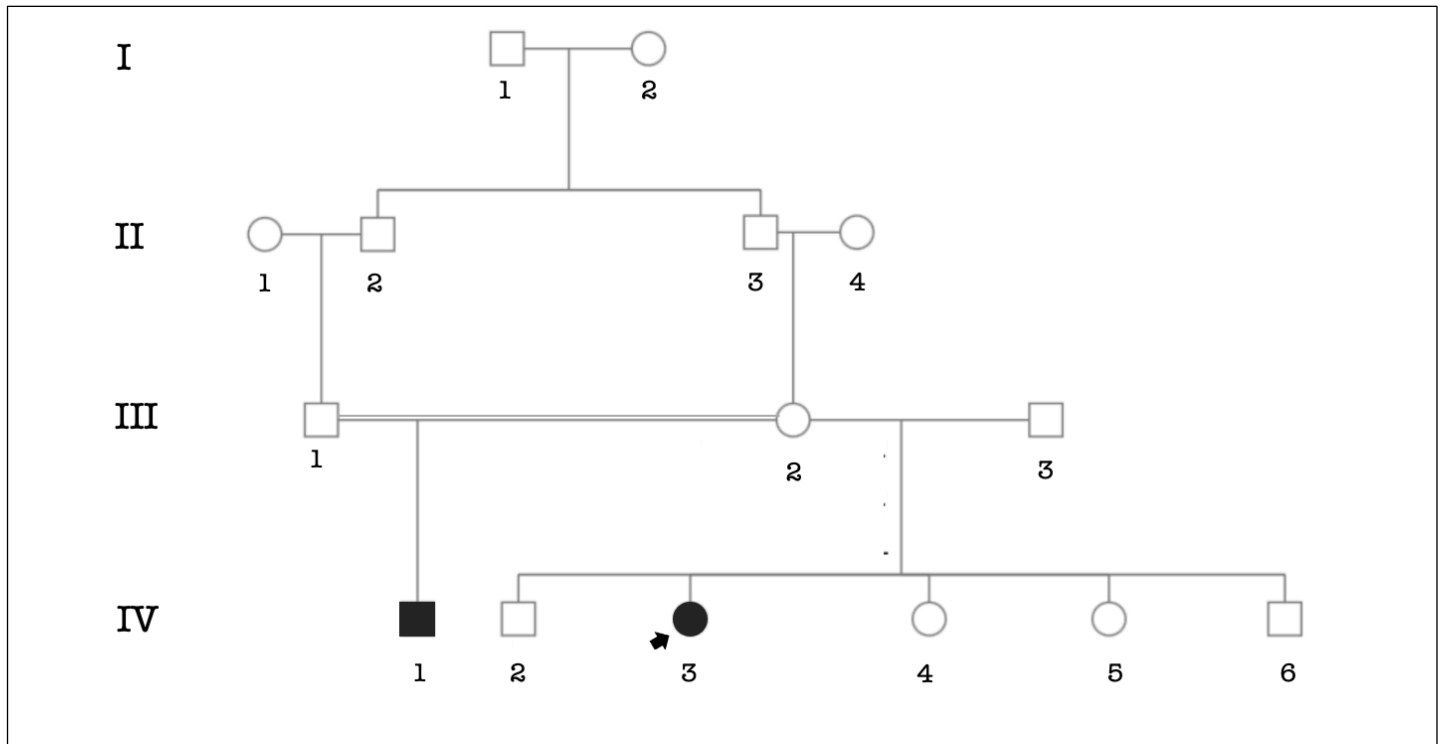

**Family33.** Showing two affected individuals segregating autosomal recessive non-syndromic hearing impairment.

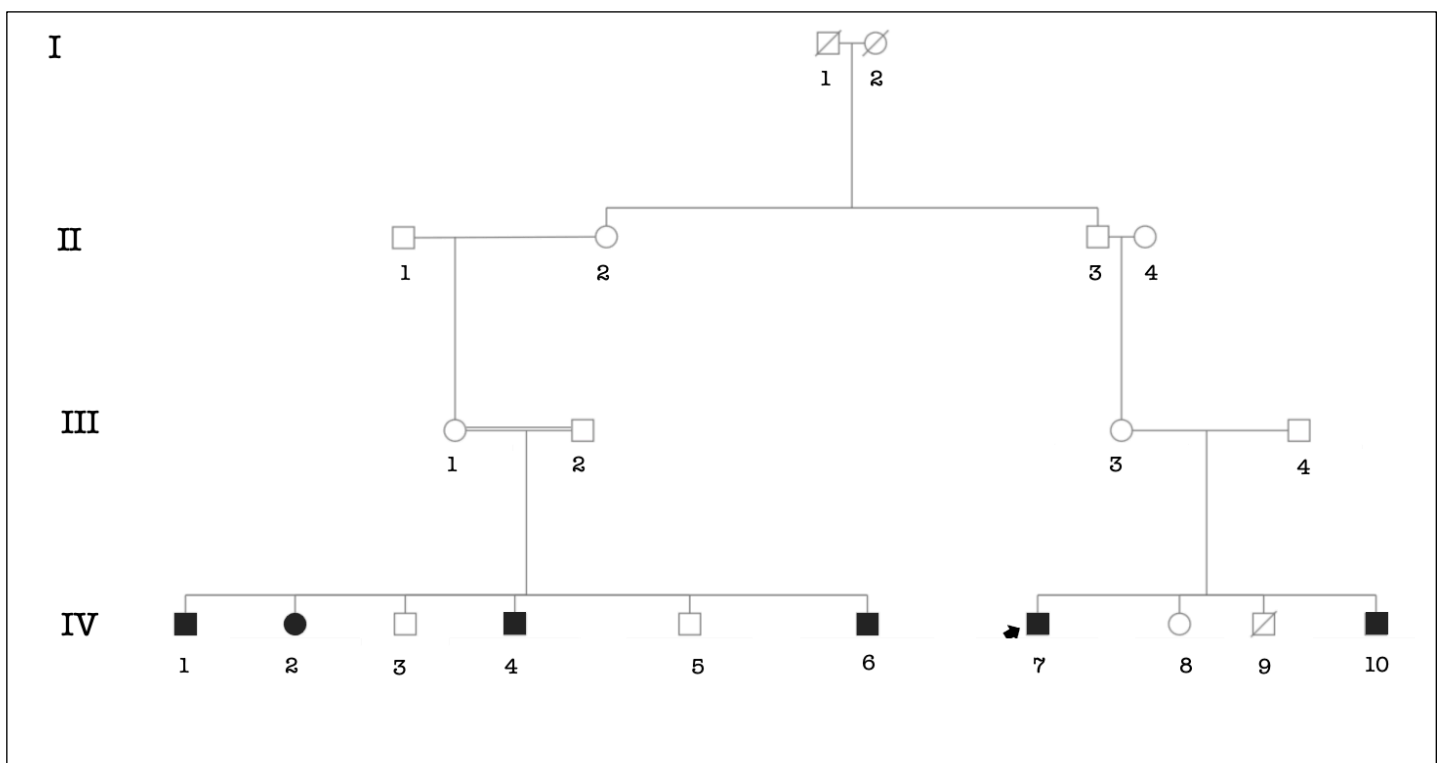

**Family34.** Showing six affected individuals segregating autosomal recessive non-syndromic hearing impairment.

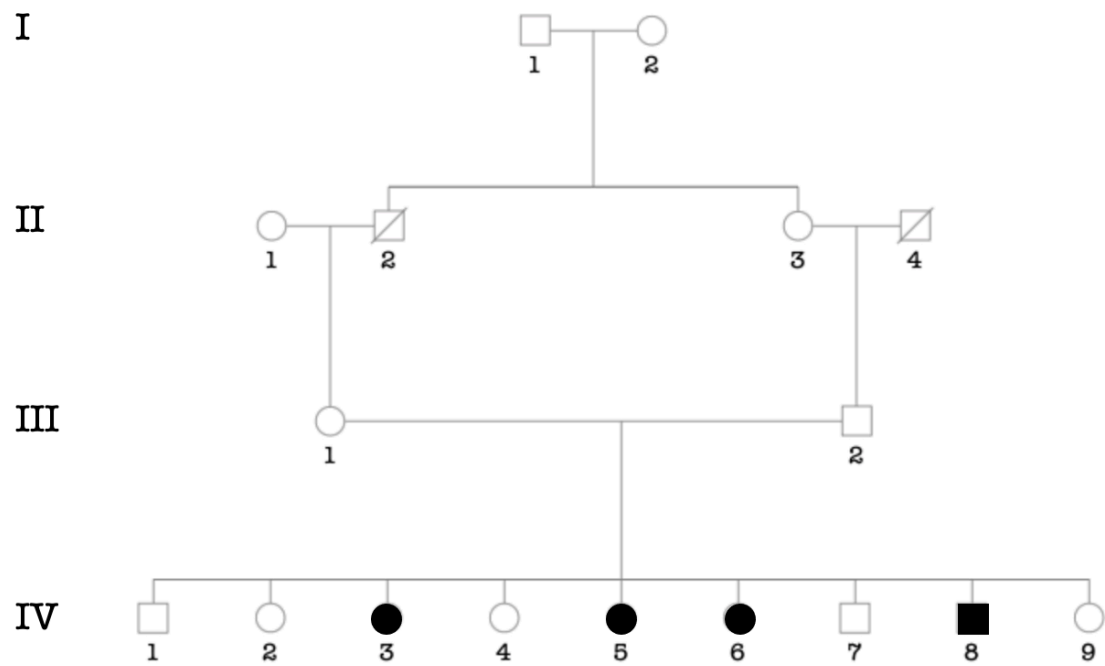

**Family35.** Showing four affected individuals from a consanguineous marriage segregating Pendred syndrome.

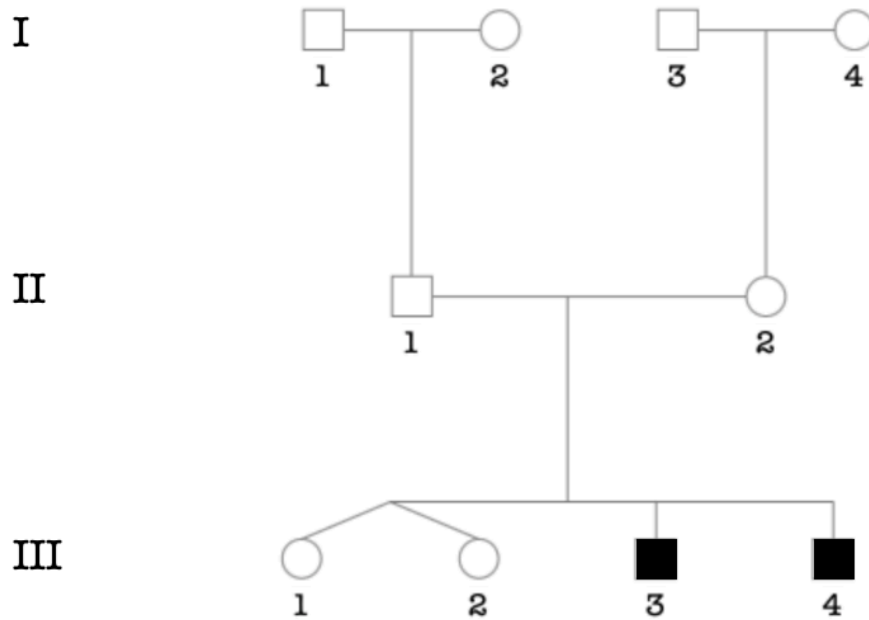

**Family36.** Showing two affected boys from a non-consanguineous marriage segregating Waardenburg syndrome.

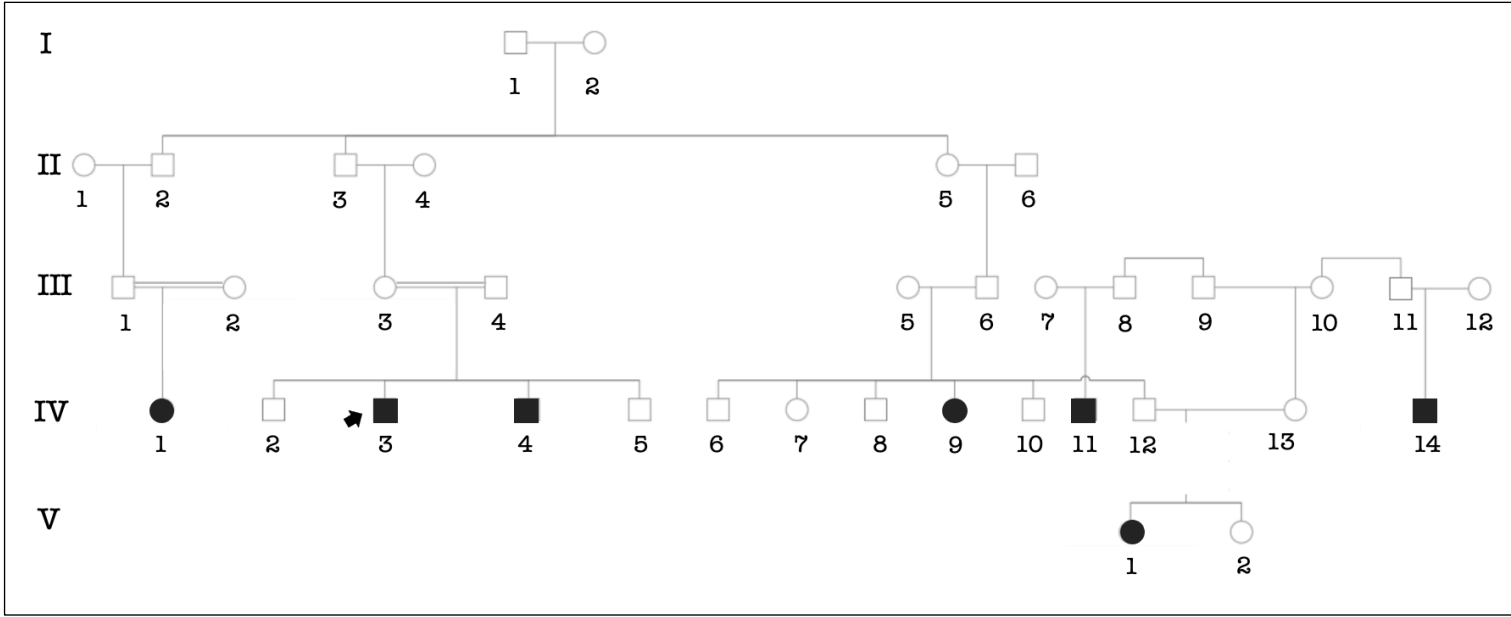

**Family37.** Showing seven affected individuals from consanguineous and non-consanguineous marriages segregating non-syndromic hearing impairment.

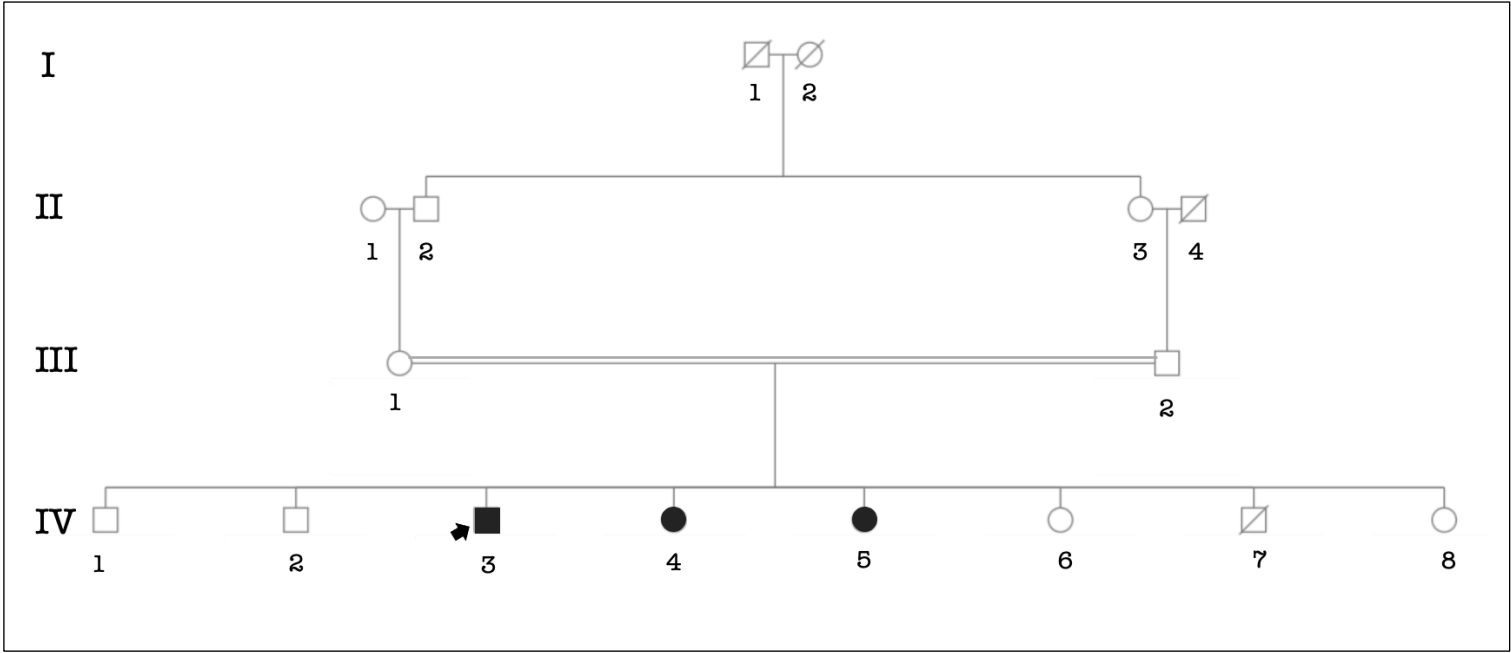

**Family38.** Showing three affected individuals from a consanguineous marriage segregating autosomal recessive non-syndromic hearing impairment.

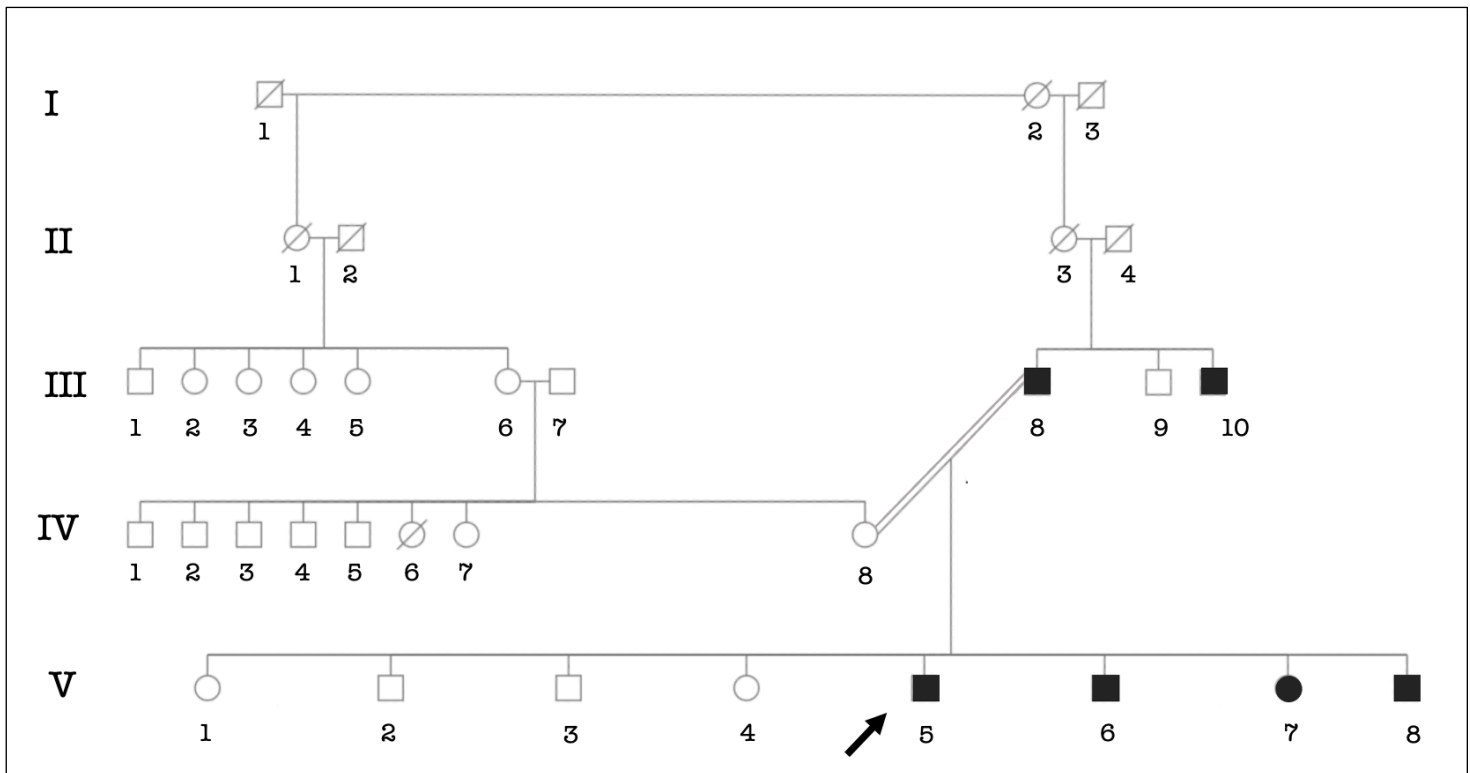

**Family39.** Showing six affected individuals segregating autosomal recessive non-syndromic hearing impairment.

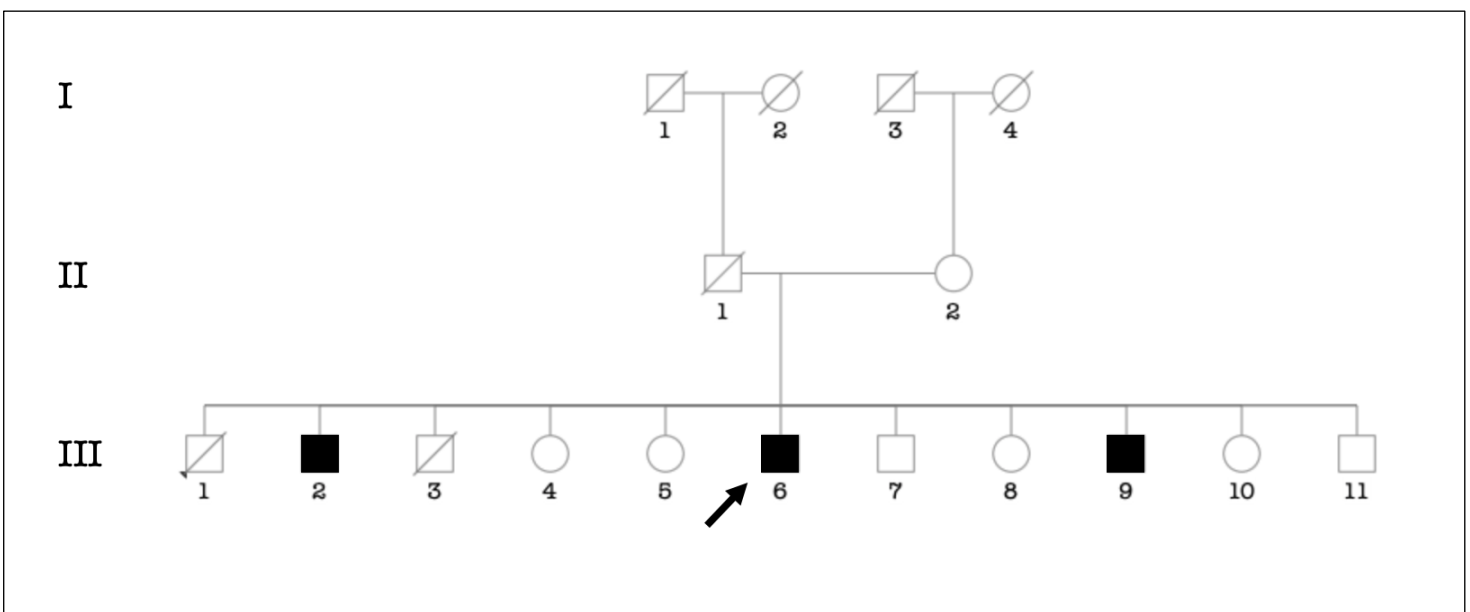

**Family40.** Showing three affected boys from a non-consanguineous marriage segregating likely recessive X-linked non-syndromic hearing impairment.

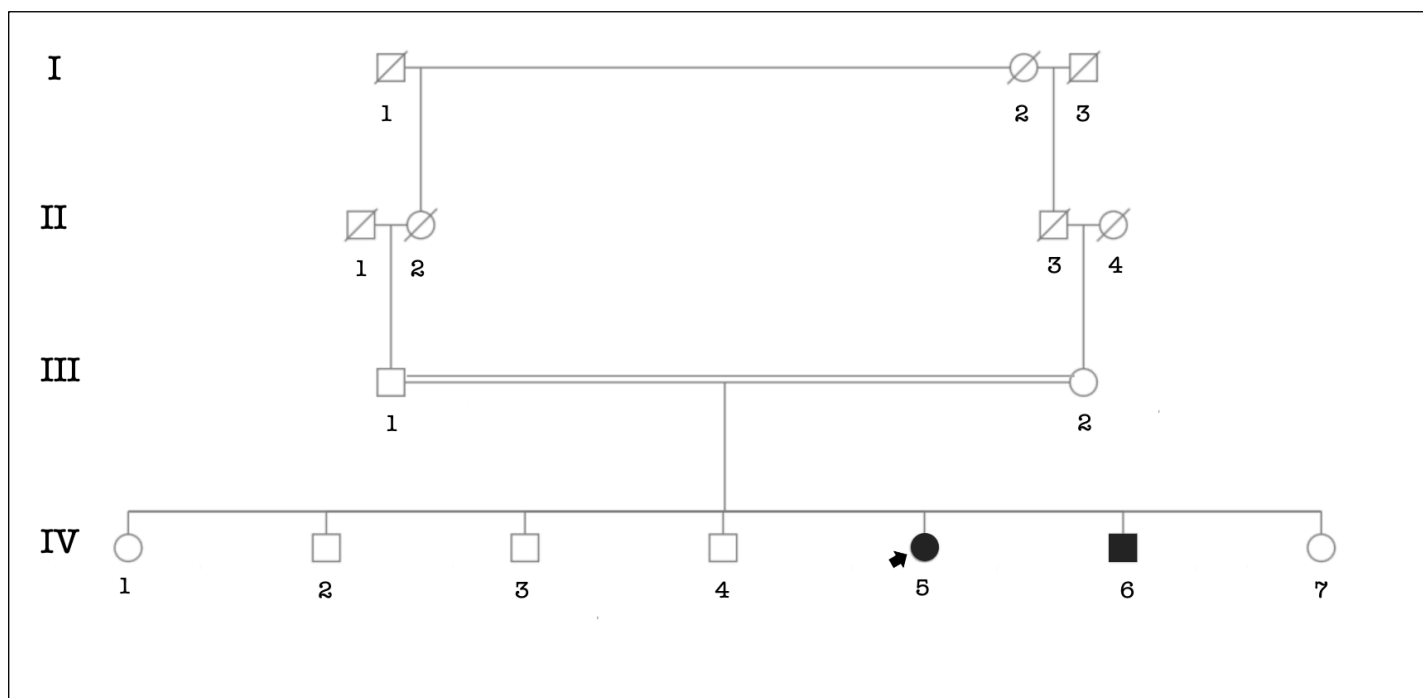

**Family41.** Pedigree showing two affected individuals from a consanguineous marriage segregating autosomal recessive non-syndromic hearing impairment.

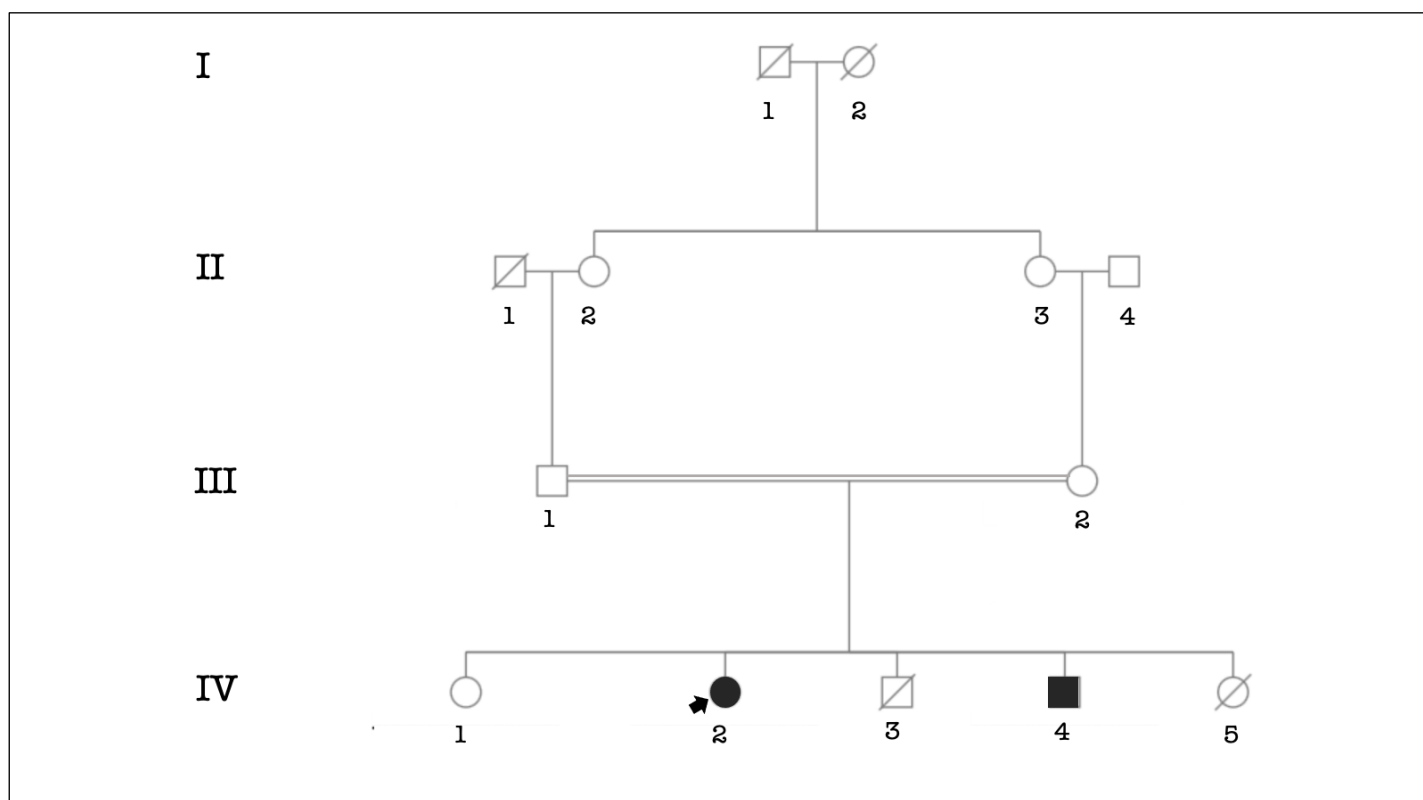

**Family42.** Pedigree showing two affected individuals from a consanguineous marriage segregating autosomal recessive non-syndromic hearing impairment.

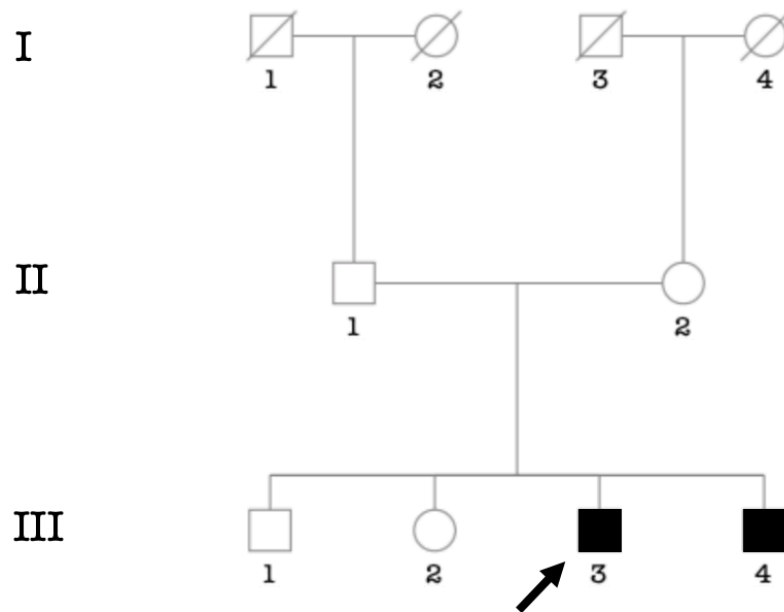

**Family43.** Pedigree showing two affected individuals from a consanguineous marriage segregating autosomal recessive non-syndromic hearing impairment.

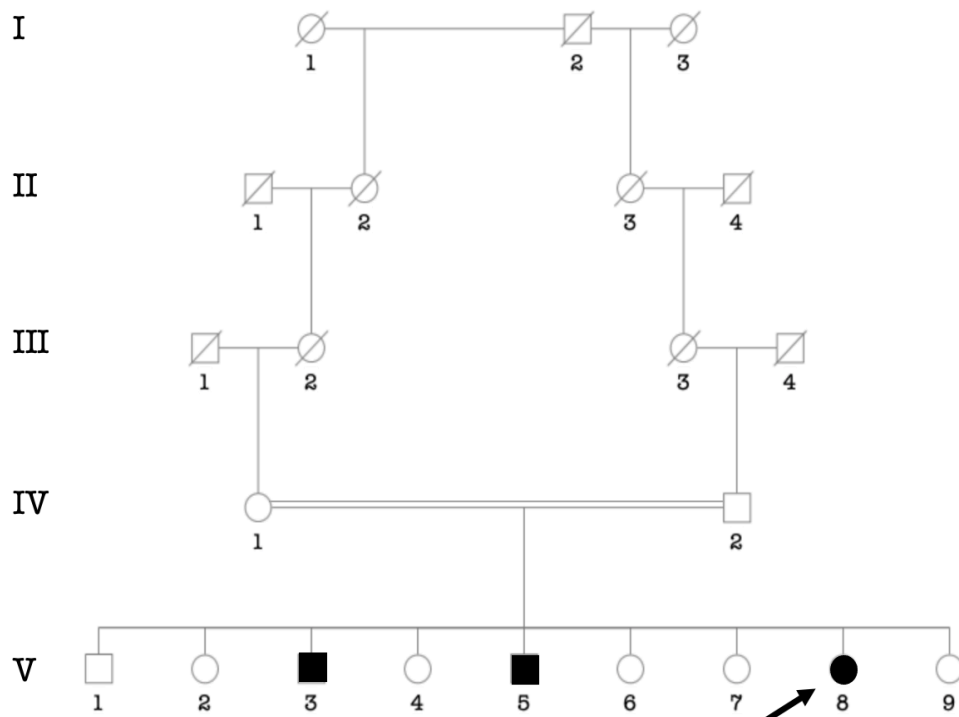

**Family44.** Pedigree showing two affected individuals from a consanguineous marriage segregating Usher syndrome type2.

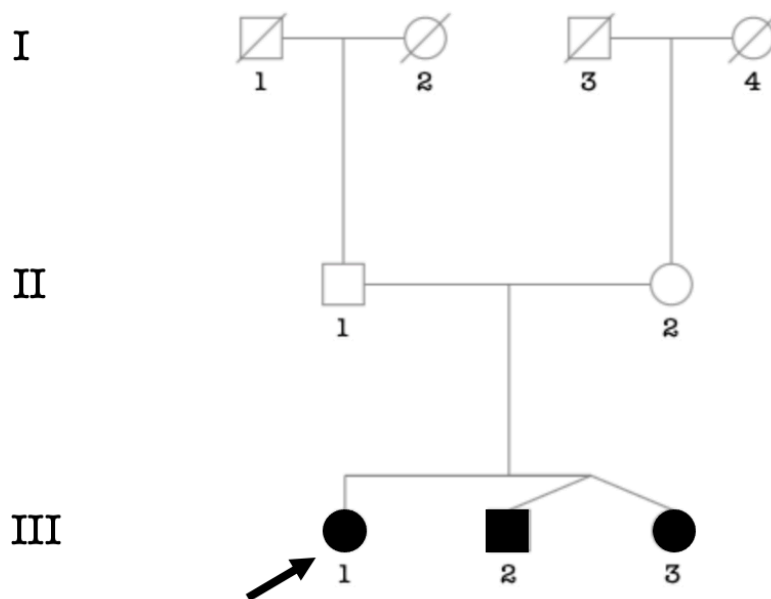

**Family45.** Pedigree showing three affected individuals from a non-consanguineous marriage segregating autosomal recessive non-syndromic hearing impairment.

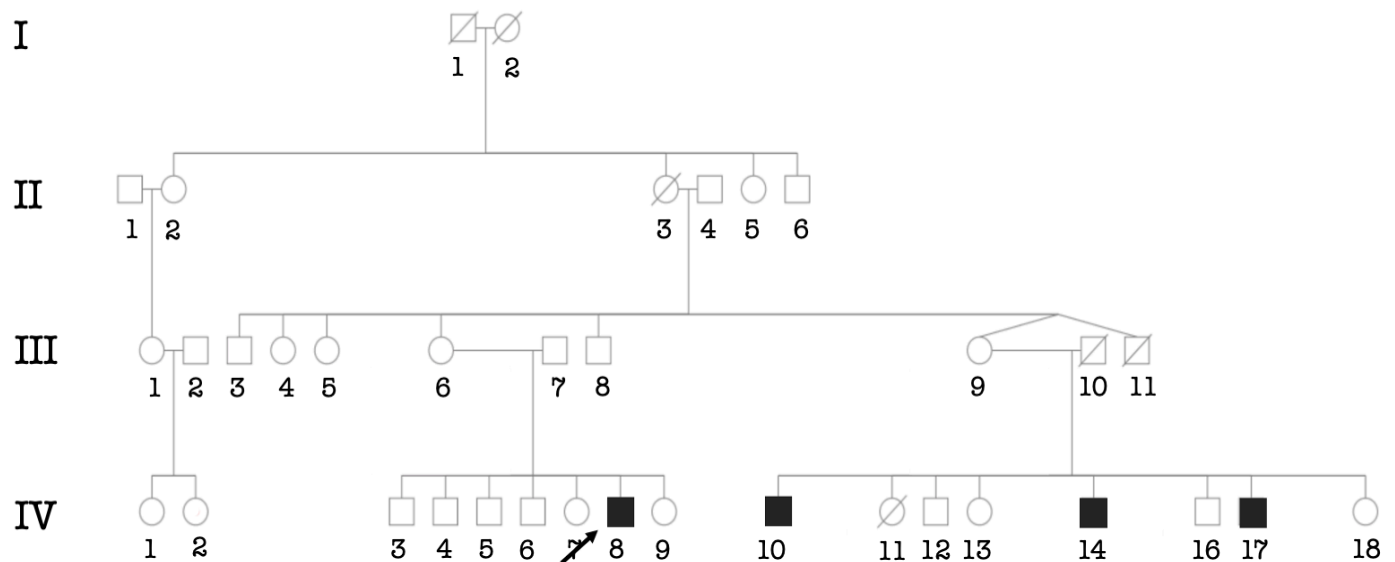

**Family46.** Pedigree showing four affected boys segregating likely recessive autosomal recessive non-syndromic hearing impairment.



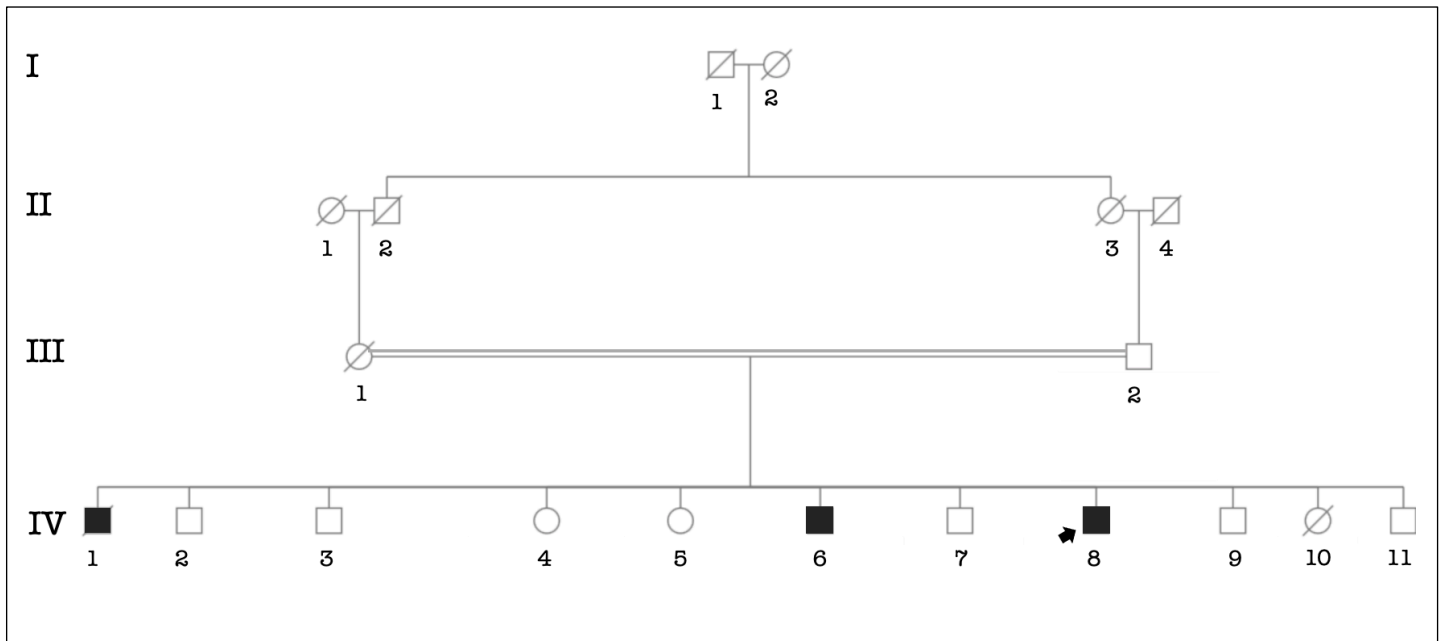

**Family47.** Pedigree showing three affected individuals from a consanguineous marriage segregating autosomal recessive non-syndromic hearing impairment.

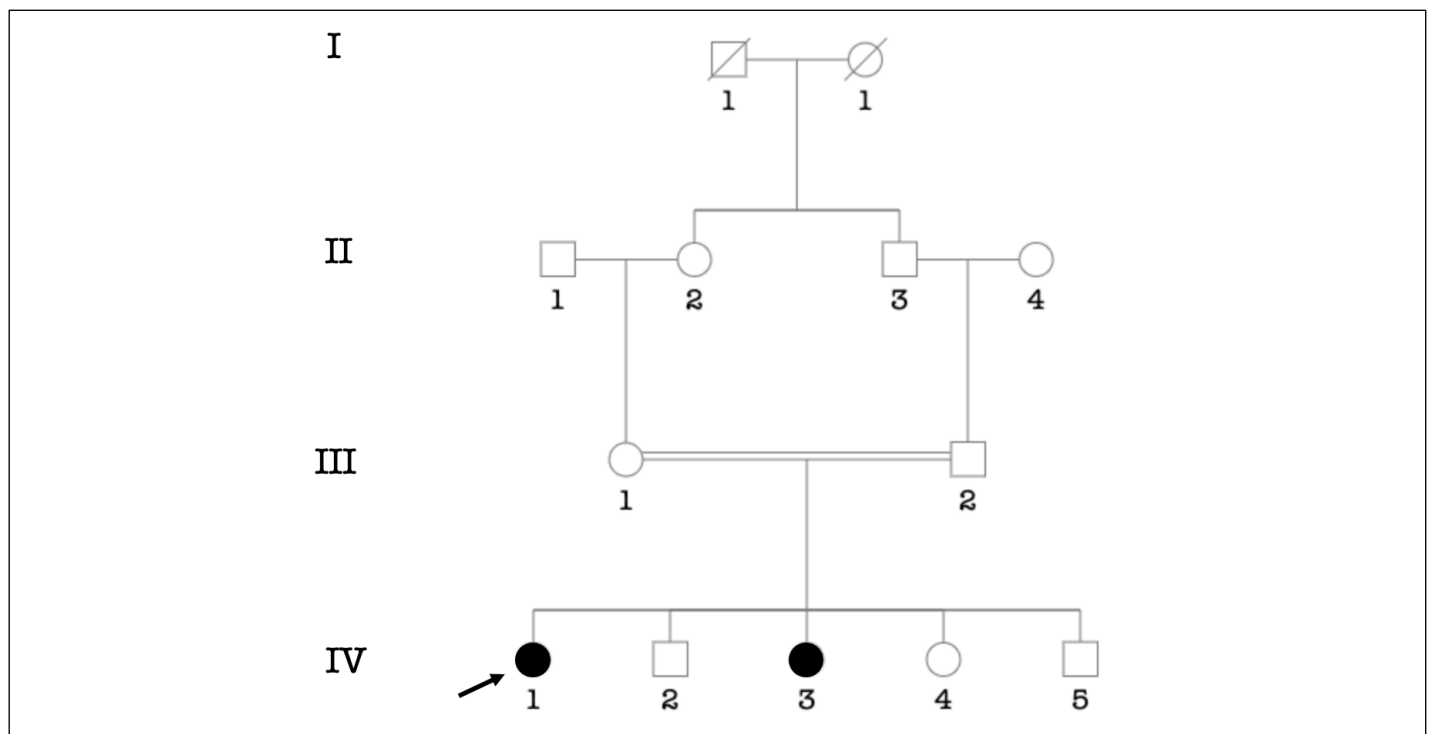

**Family48.** Pedigree showing two affected girls from a consanguineous marriage segregating autosomal recessive non-syndromic hearing impairment

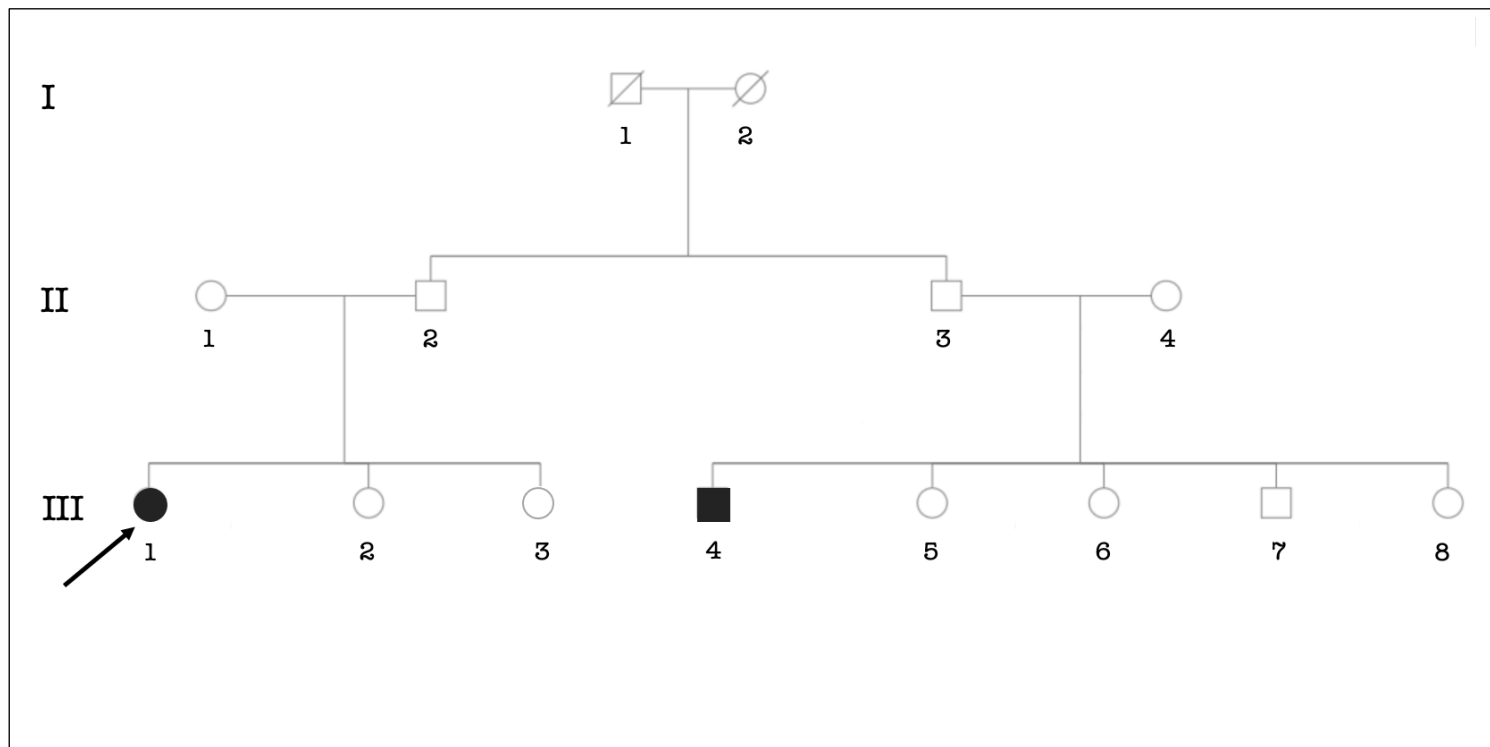

**Family49.** Pedigree showing two affected individuals from a non-consanguineous marriage segregating autosomal recessive non-syndromic hearing impairment

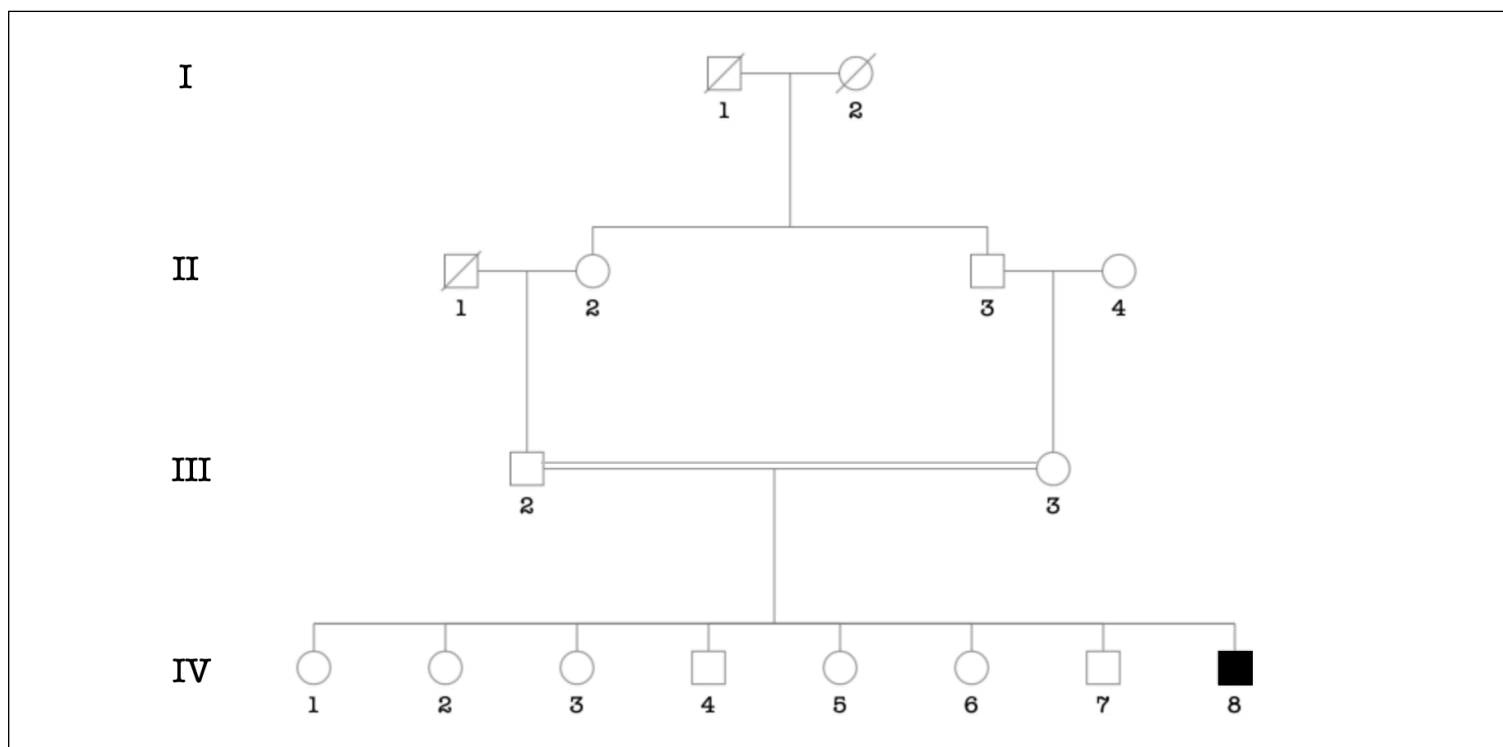

**Family50.** Pedigree showing a proband with Waardenburg Syndrome type2.

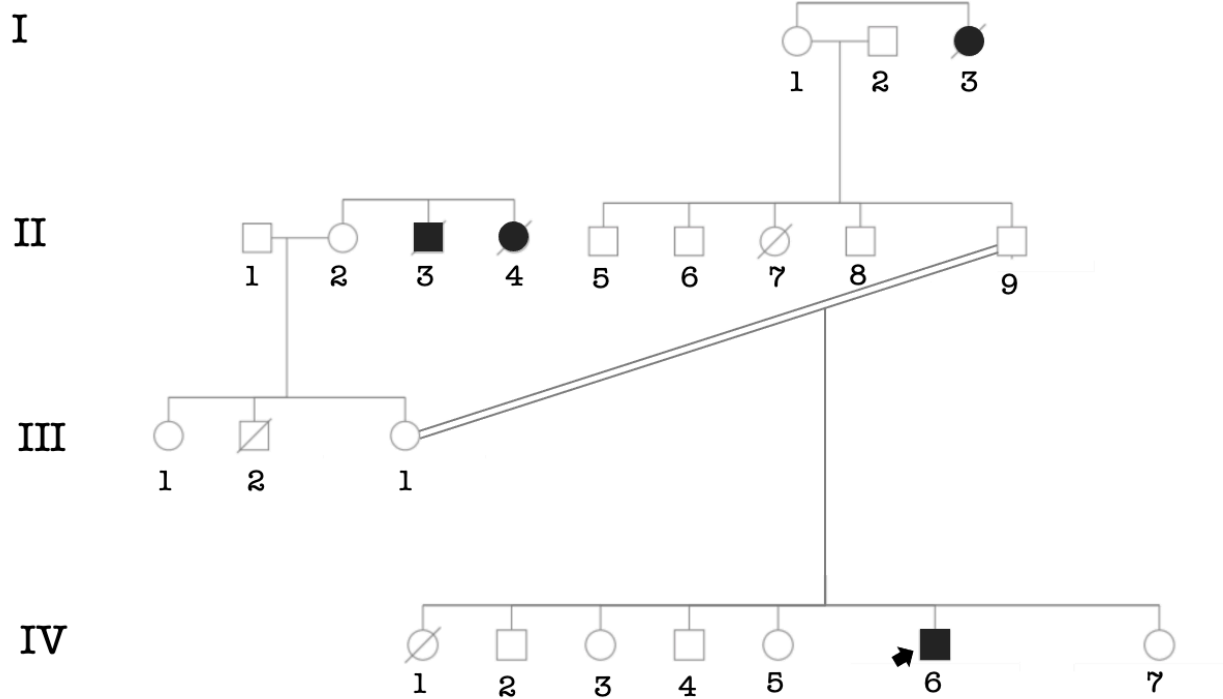

**Family51.** Pedigree showing four affected individuals segregating autosomal recessive non-syndromic hearing impairment

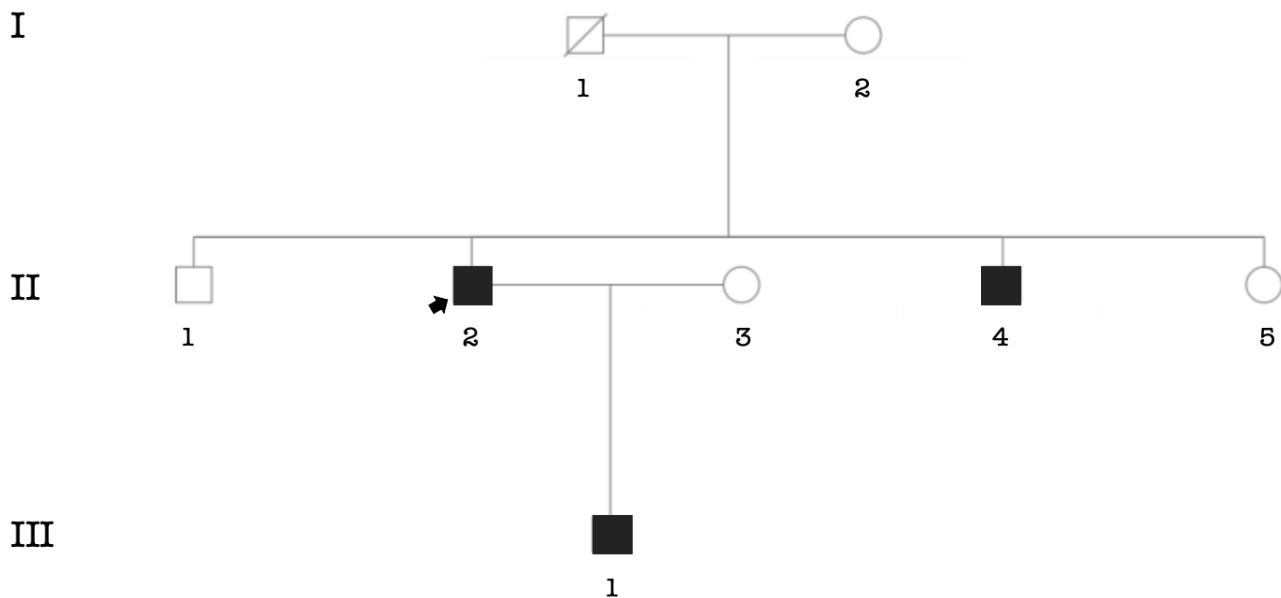

**Family52.** Pedigree showing three affected individuals segregating Waardenburg syndrome type 2.



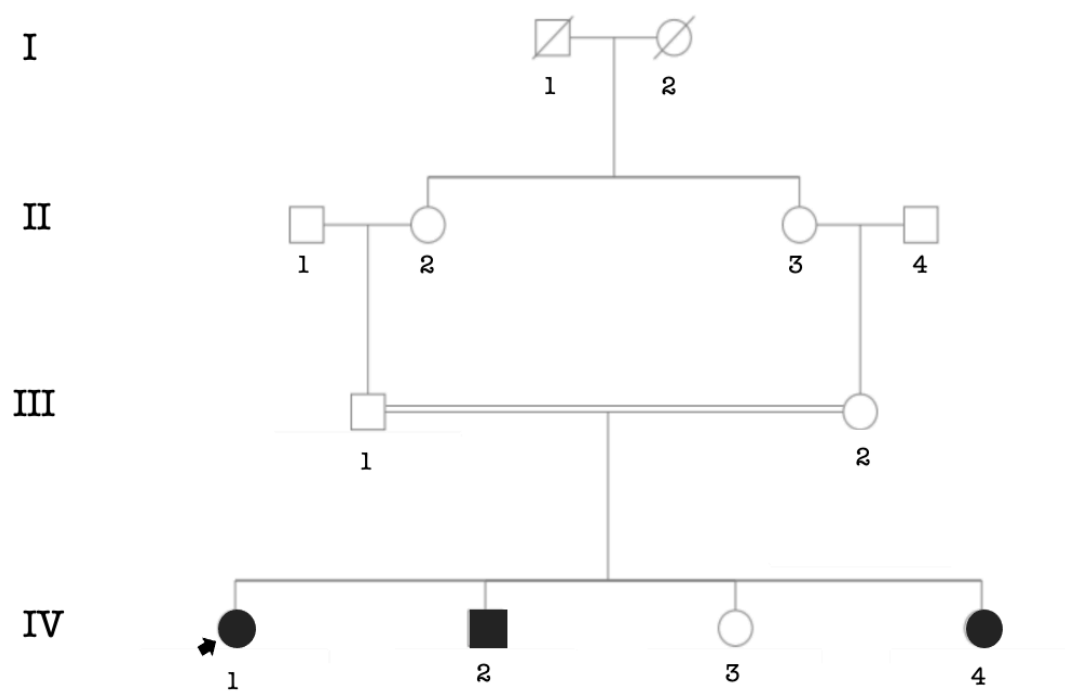

**Family55.** Pedigree showing three affected individuals from a consanguineous marriage segregating autosomal recessive non-syndromic hearing impairment

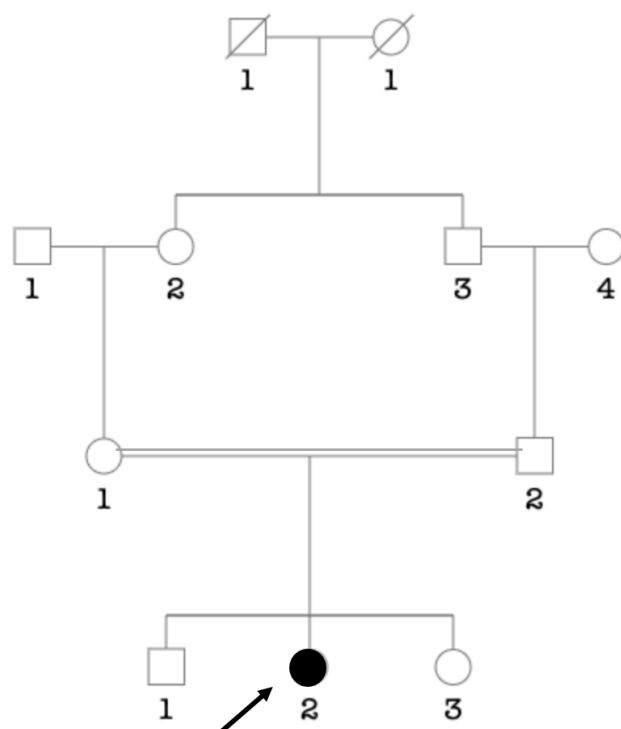

**Family56.** Pedigree showing a proband indicates by an arrow with non-syndromic hearing impairment

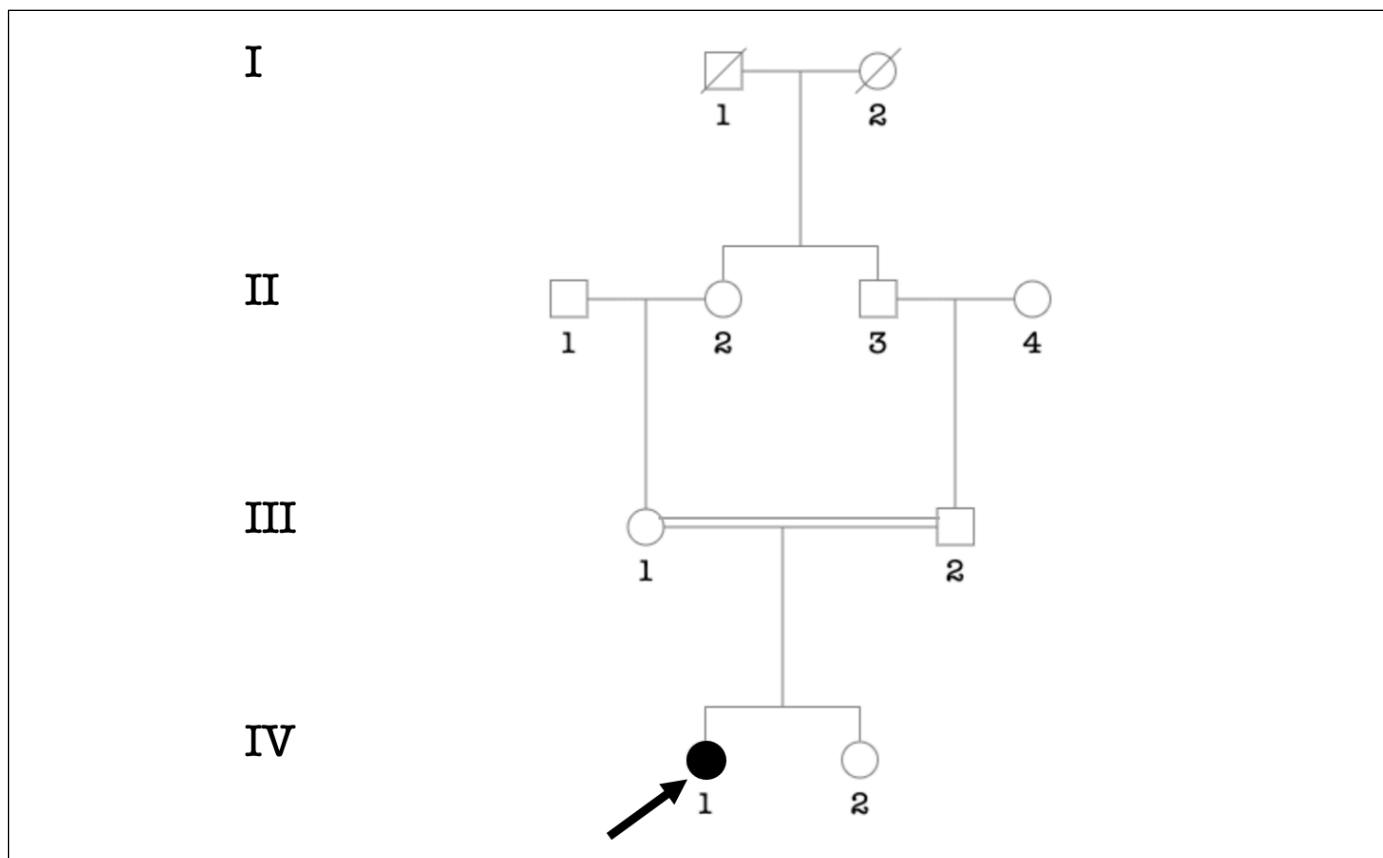

**Family57.** Pedigree showing a proband indicates by an arrow with non-syndromic hearing impairment

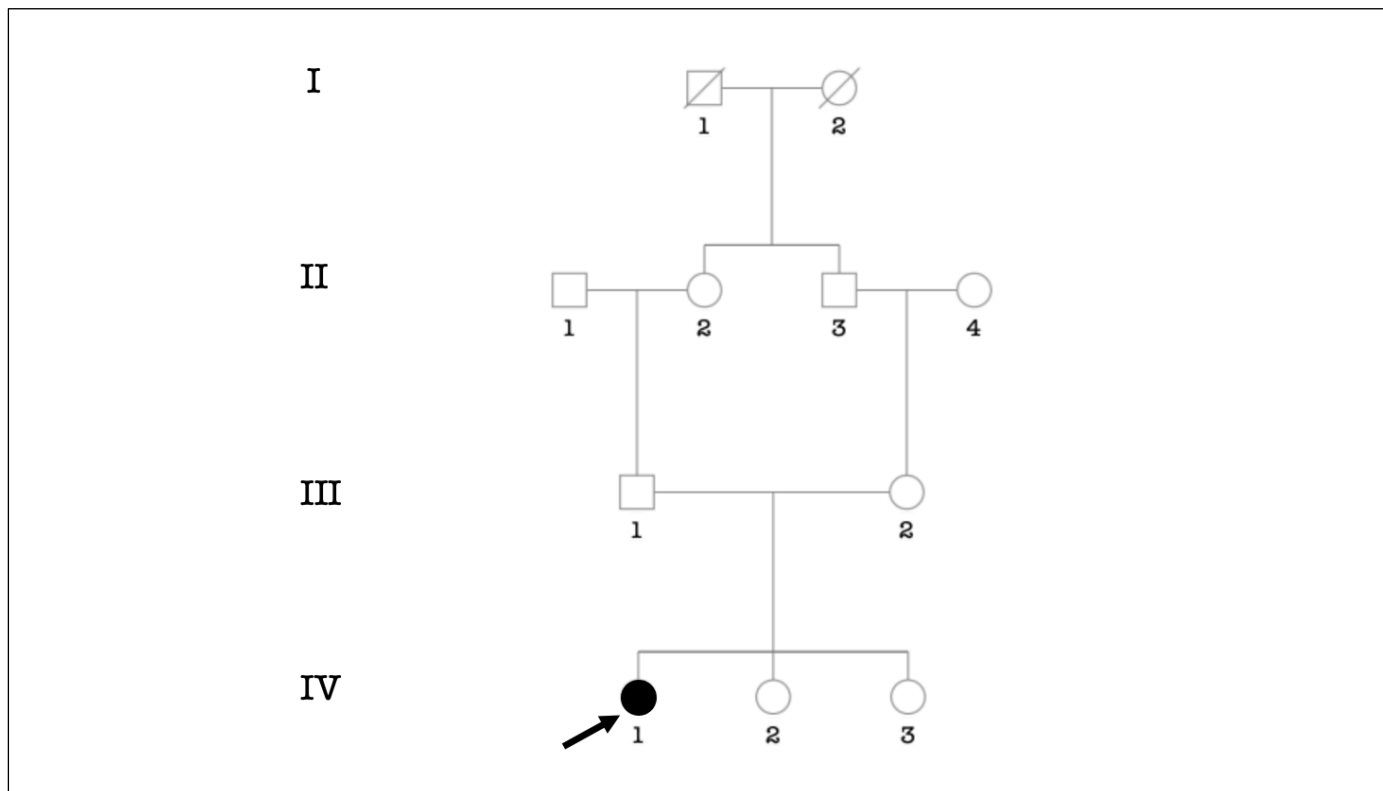

**Family58.** Pedigree showing a proband indicates by an arrow with non-syndromic hearing impairment

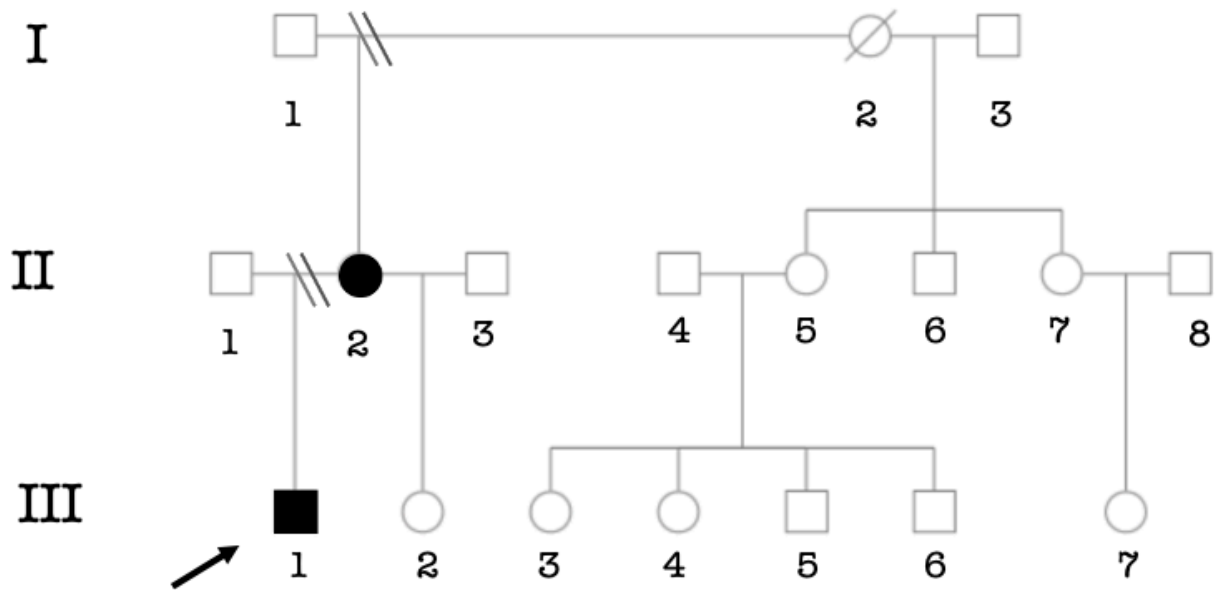

**Family59.** Pedigree showing two affected individuals segregating autosomal dominant non-syndromic hearing impairment

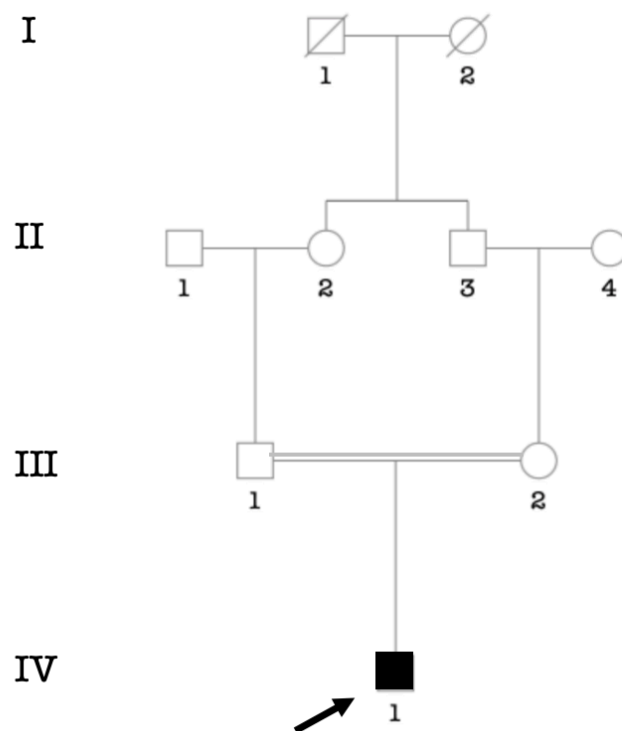

**Family60.** Pedigree showing a proband indicates by an arrow with non-syndromic hearing impairment

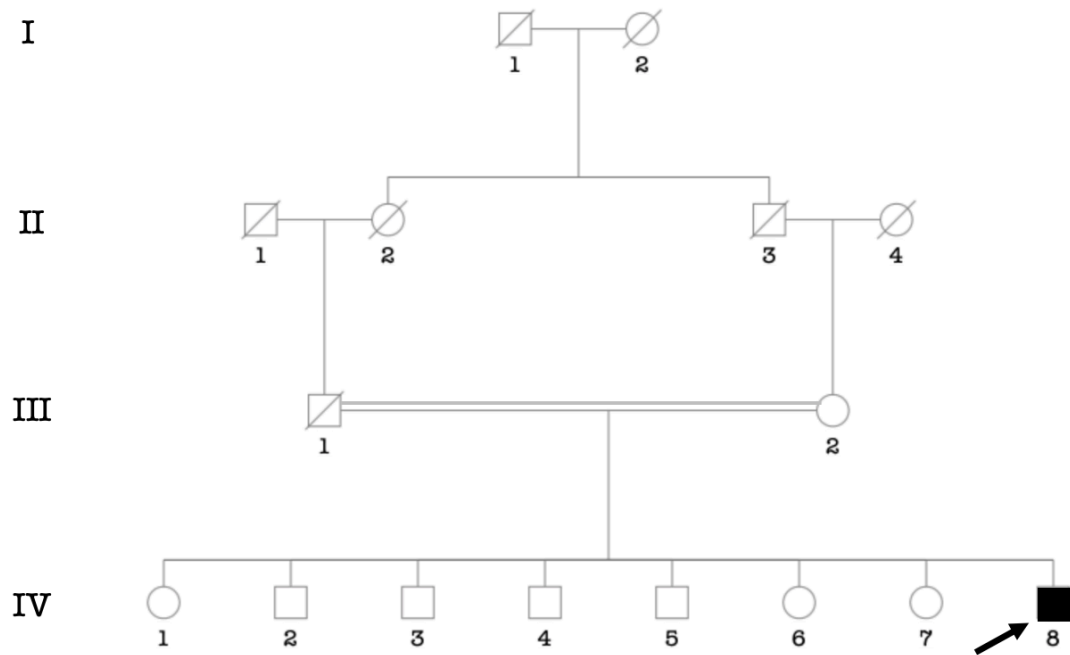

**Family61.** Pedigree showing a proband indicates by an arrow with non-syndromic hearing impairment

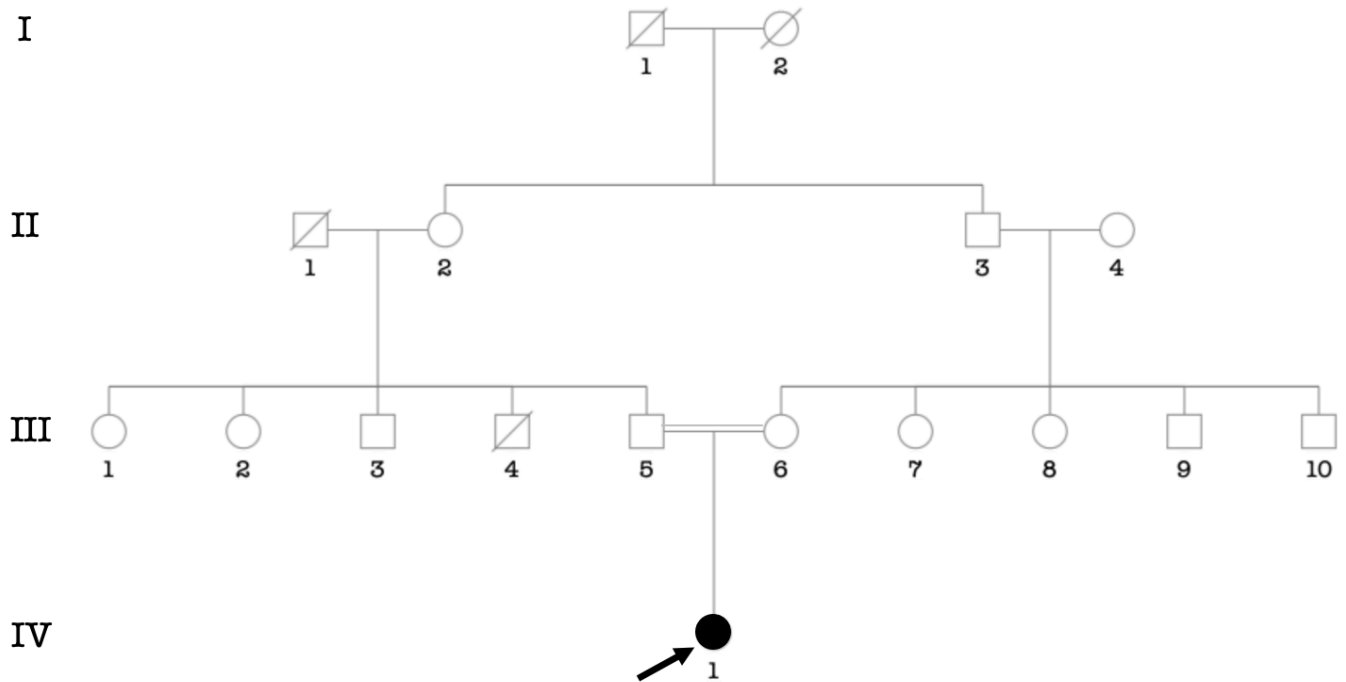

**Family62.** Pedigree showing a proband indicates by an arrow from a consanguineous marriage with non-syndromic hearing impairment



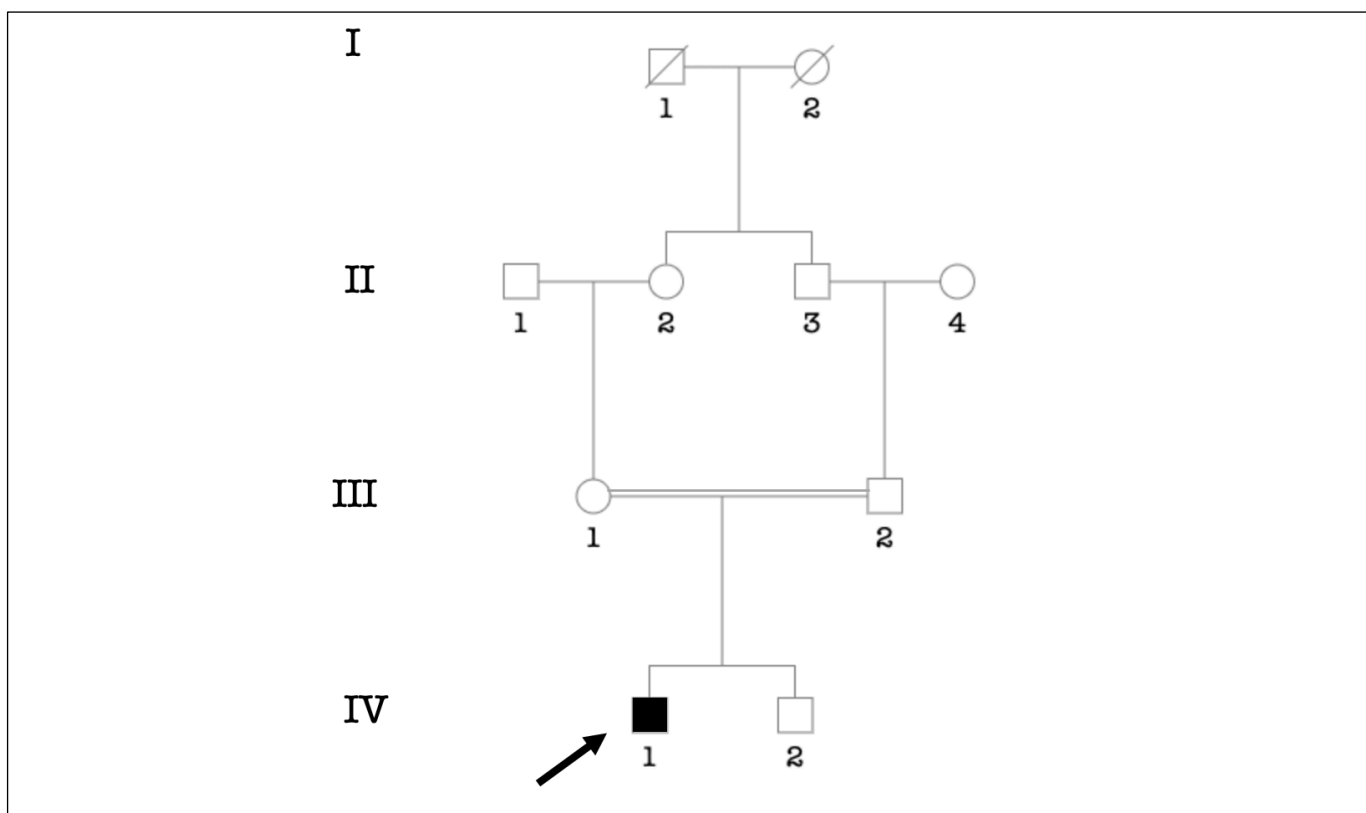

**Family63.** Pedigree showing a proband indicates by an arrow with non-syndromic hearing impairment

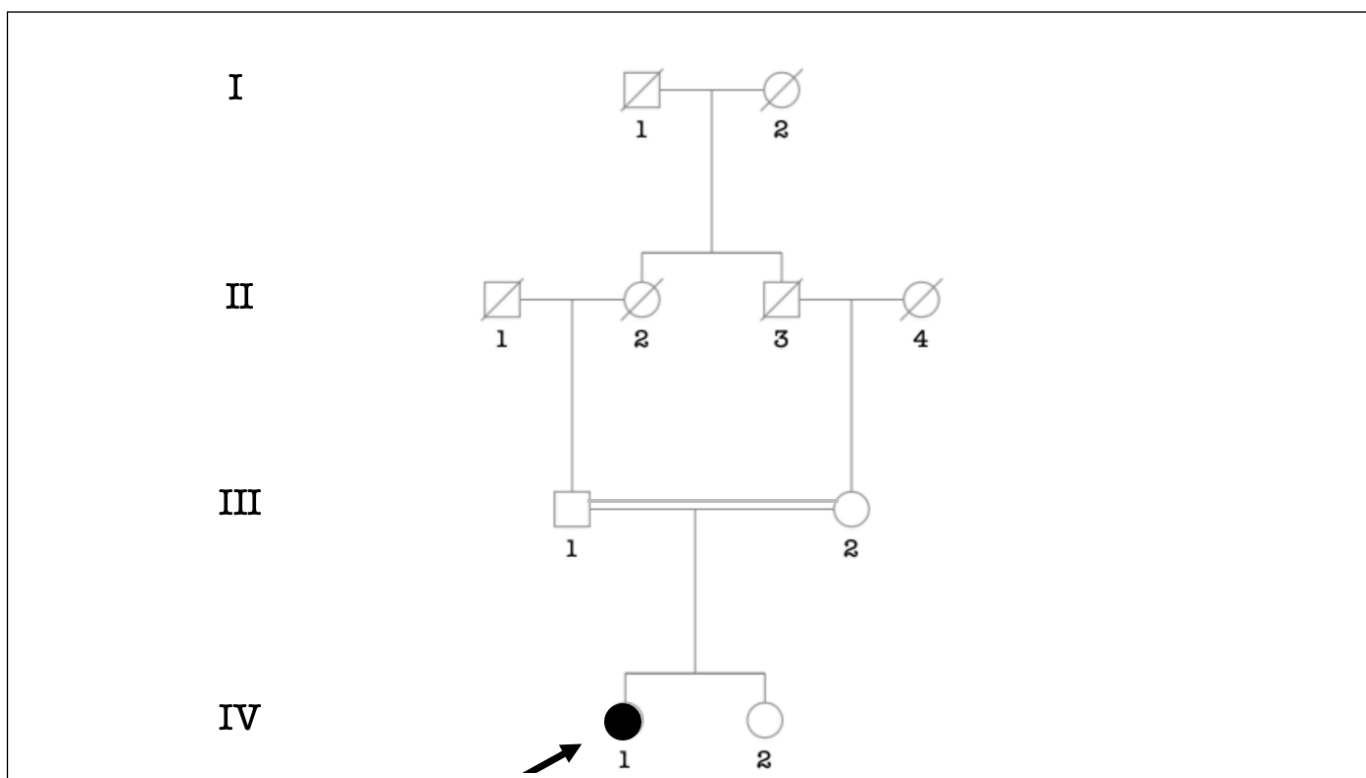

**Family64.** Pedigree showing a proband indicates by an arrow with non-syndromic hearing impairment

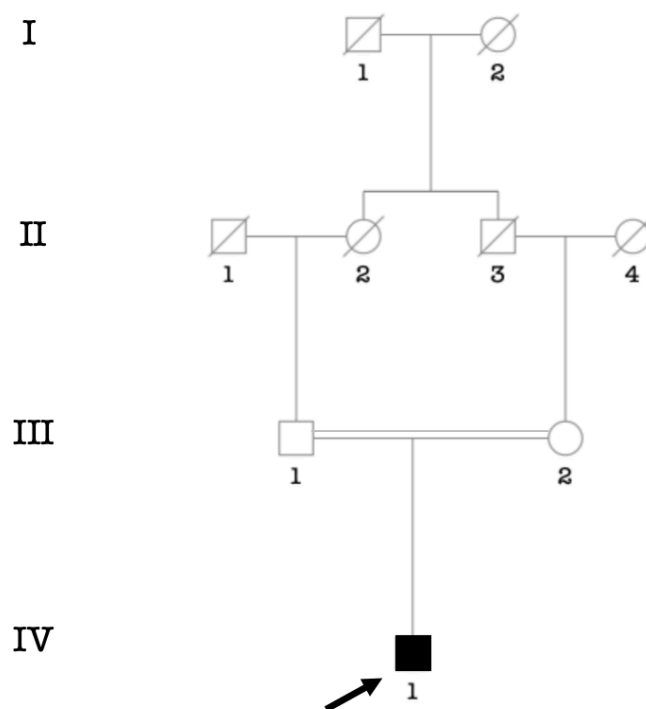

**Family65.** Pedigree showing a proband indicates by an arrow with non-syndromic hearing impairment

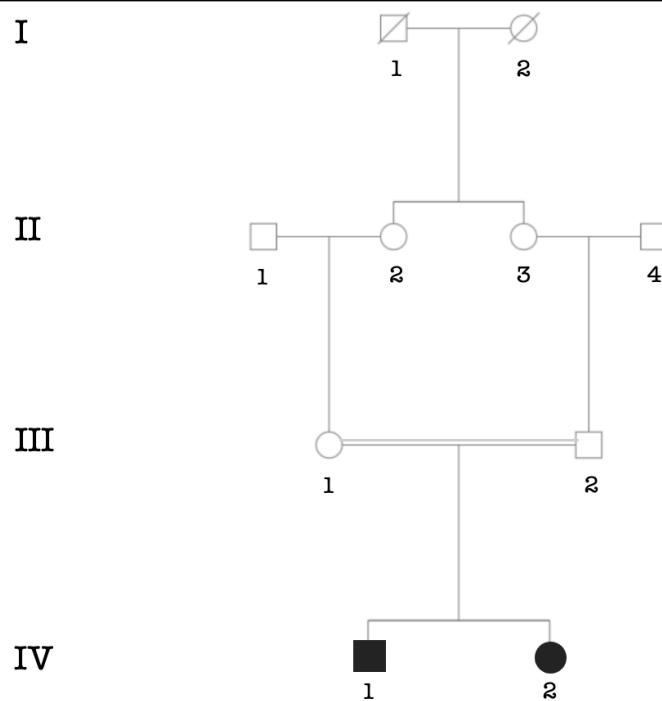

**Family66.** Showing two affected individuals from a consanguineous marriage segregating autosomal recessive non-syndromic hearing impairment.

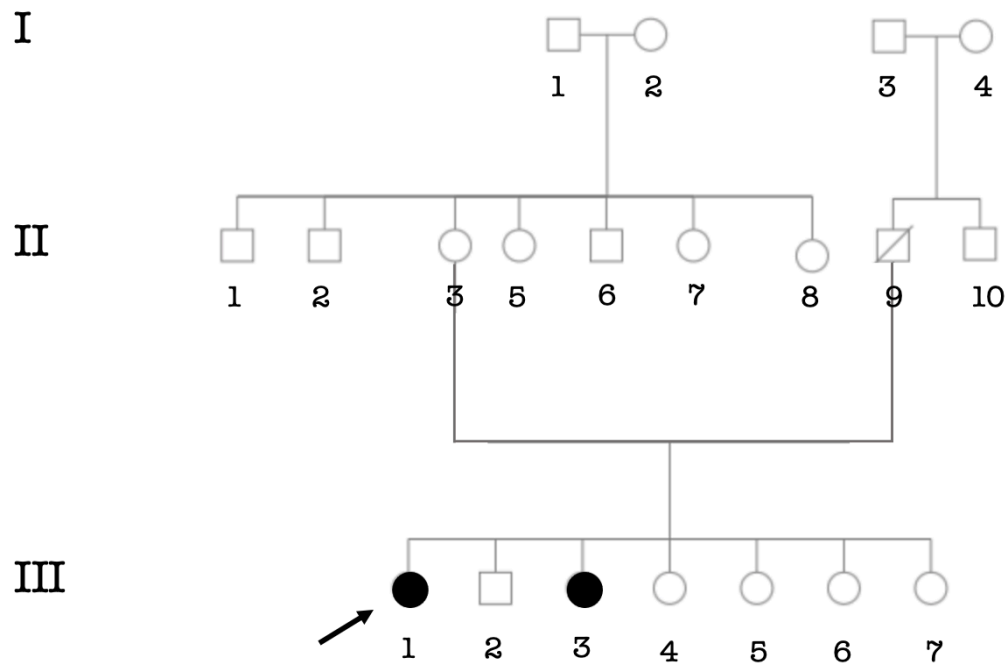

**Family67.** Showing two affected individuals from a non-consanguineous marriage segregating an autosomal recessive non-specific syndrome

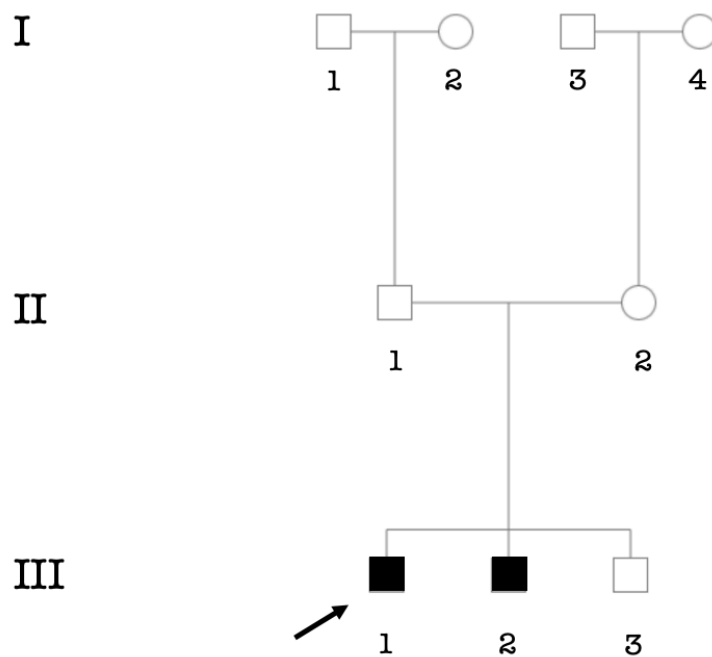

**Family68.** Showing two affected individuals from a non-consanguineous marriage segregating likely autosomal recessive non-syndromic hearing impairment.

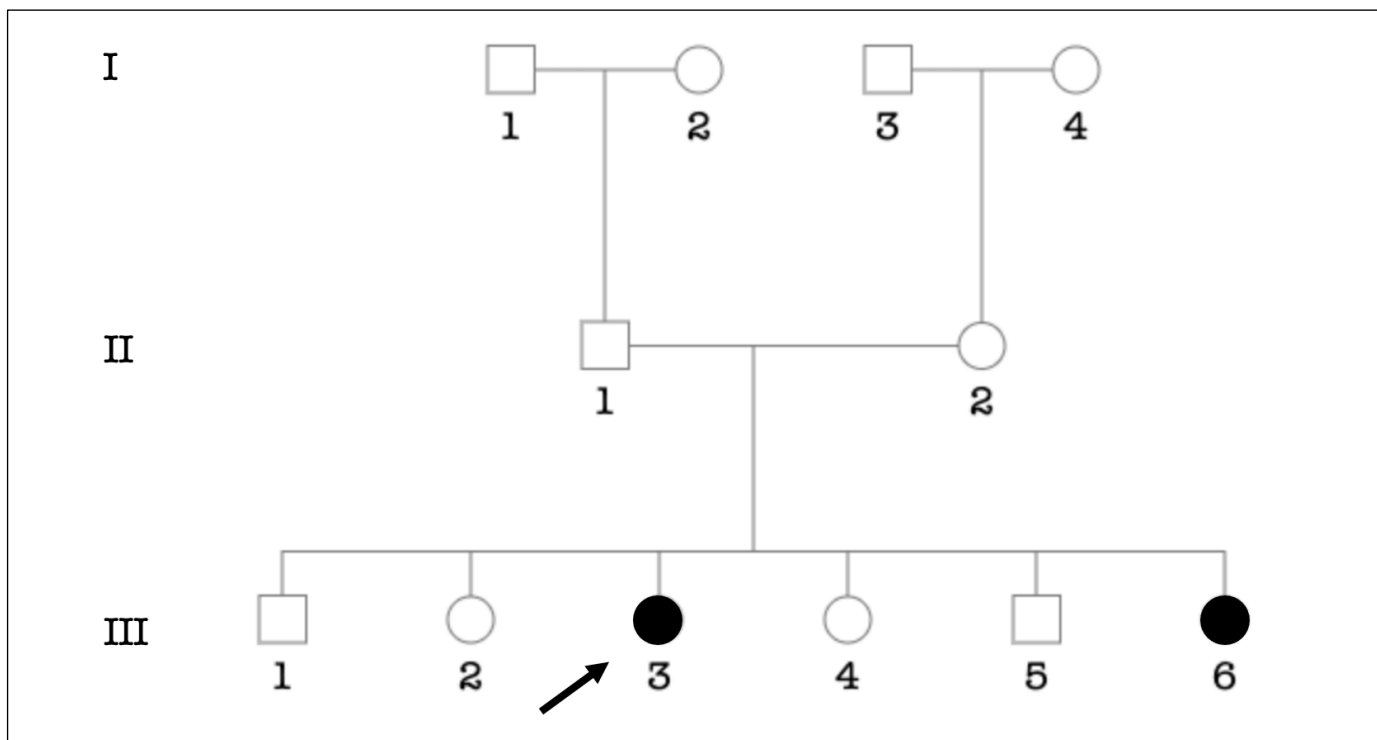

**Family69.** Pedigree showing two affected girls from a non-consanguineous marriage segregating autosomal recessive non-syndromic hearing impairment

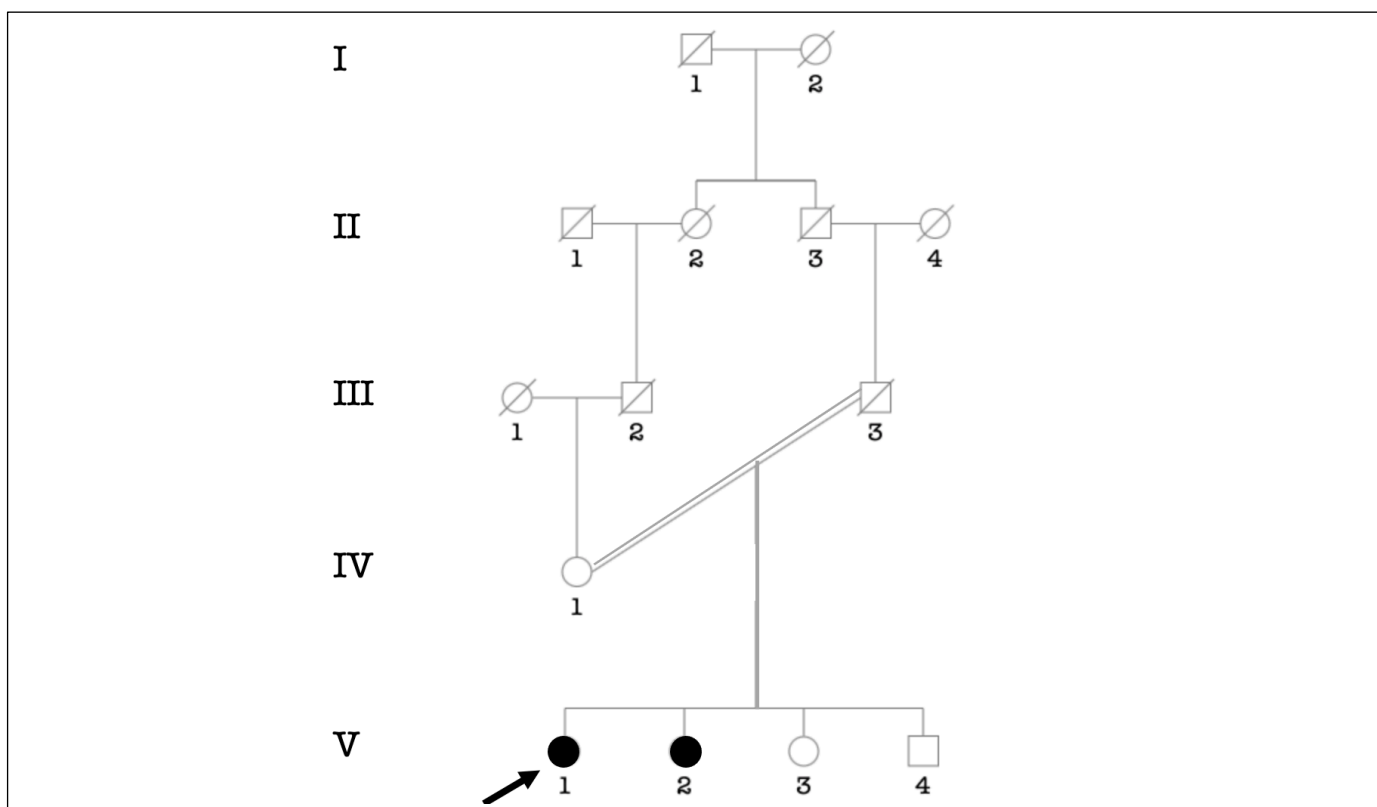

**Family70.** Pedigree showing two affected girls from a consanguineous marriage segregating autosomal recessive non-syndromic hearing impairment

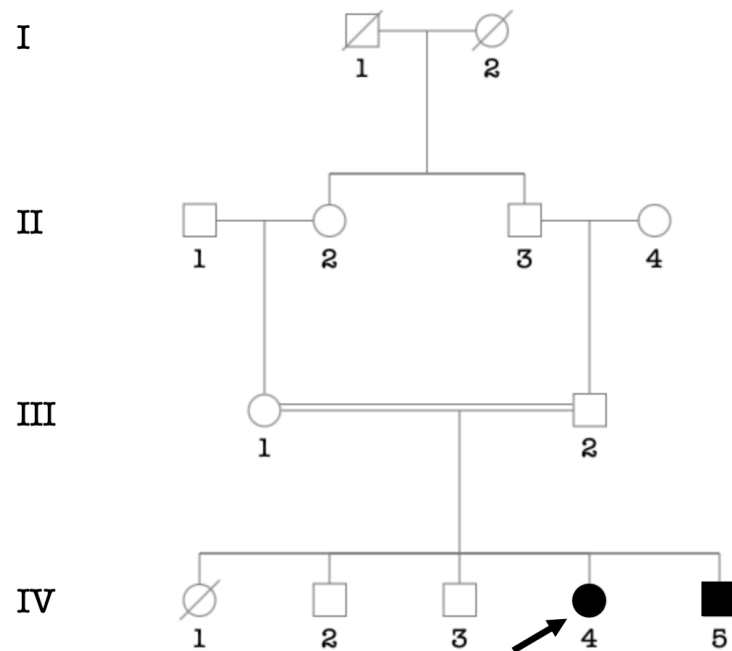

**Family71.** Pedigree showing two affected individuals from a consanguineous marriage segregating autosomal recessive non-syndromic hearing impairment

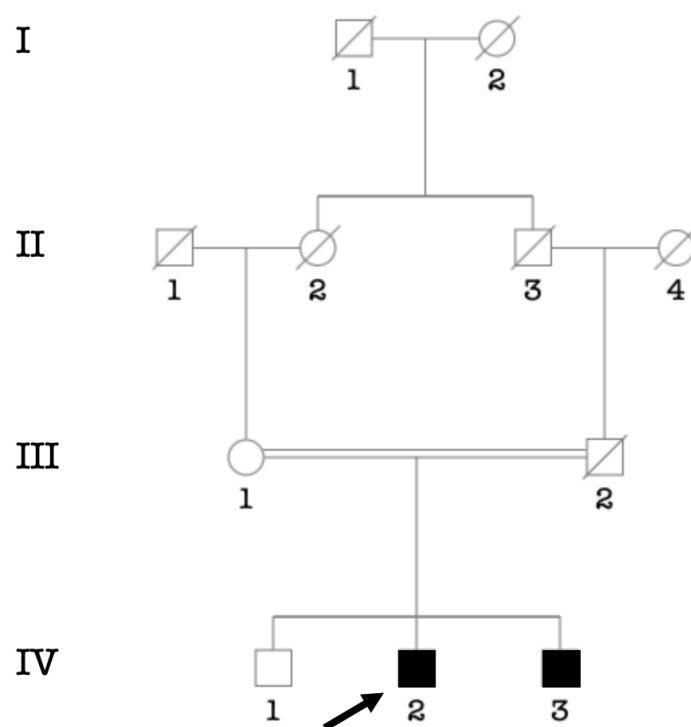

**Family72.** Pedigree showing two affected boys from a consanguineous marriage segregating autosomal recessive non-syndromic hearing impairment

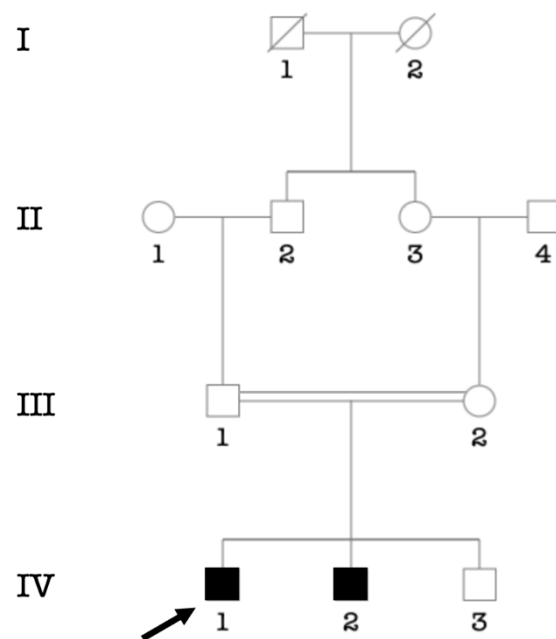

**Family73.** Pedigree showing two affected boys from a consanguineous marriage segregating autosomal recessive non-syndromic hearing impairment

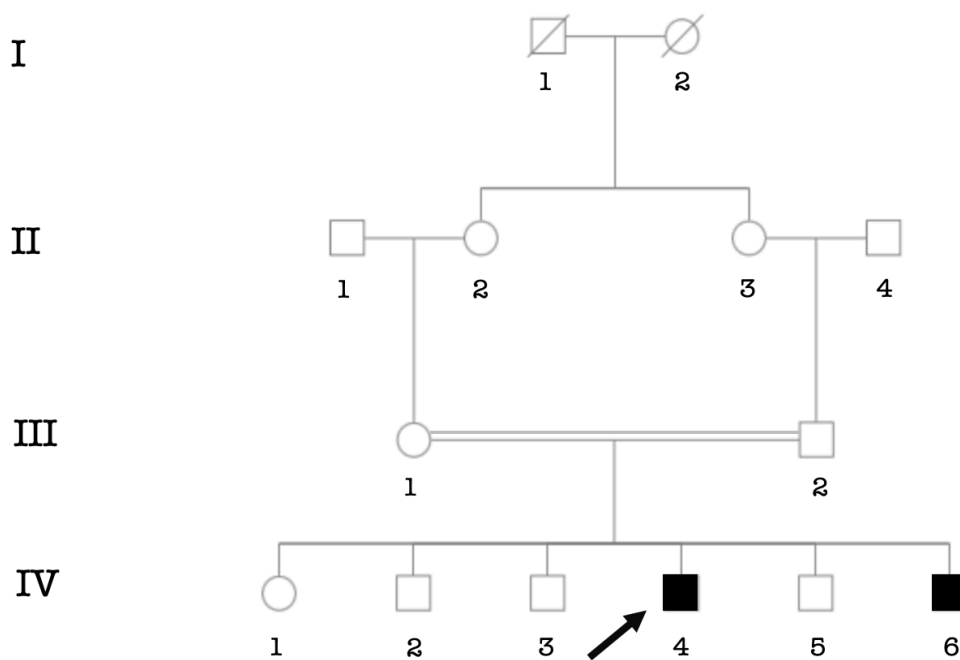

**Family74.** Pedigree showing two affected boys from a consanguineous marriage segregating autosomal recessive non-syndromic hearing impairment

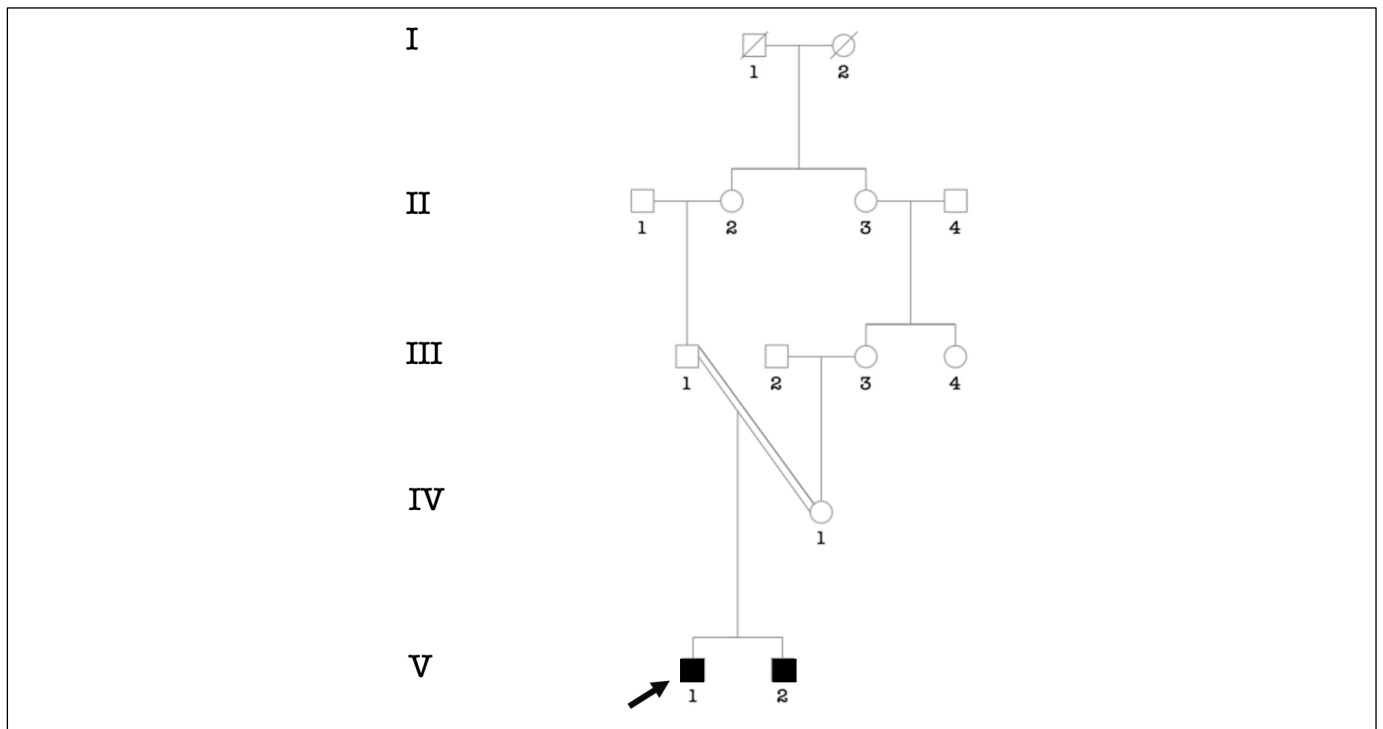

**Family75.** Pedigree showing two affected individuals from a consanguineous marriage segregating autosomal recessive non-syndromic hearing impairment.

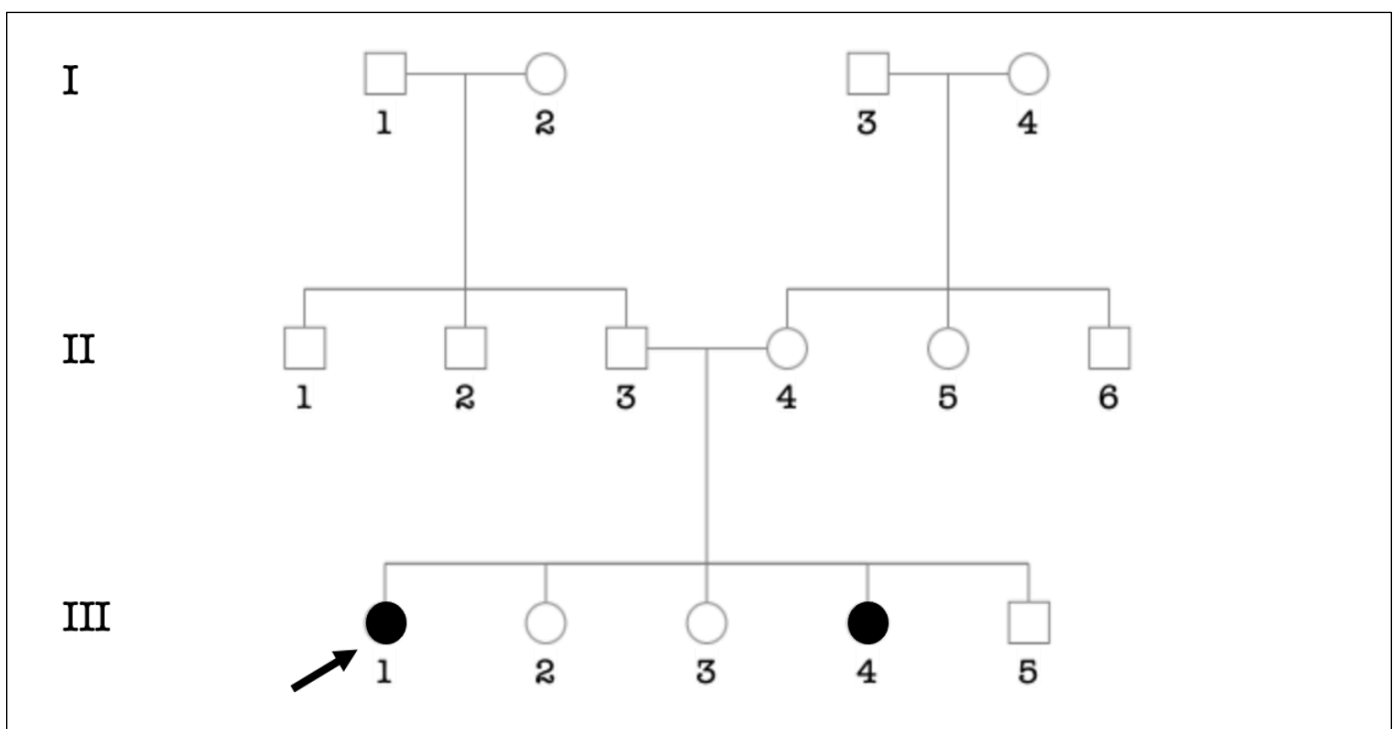

**Family76.** Pedigree showing two affected girls segregating autosomal recessive non-syndromic hearing impairment.

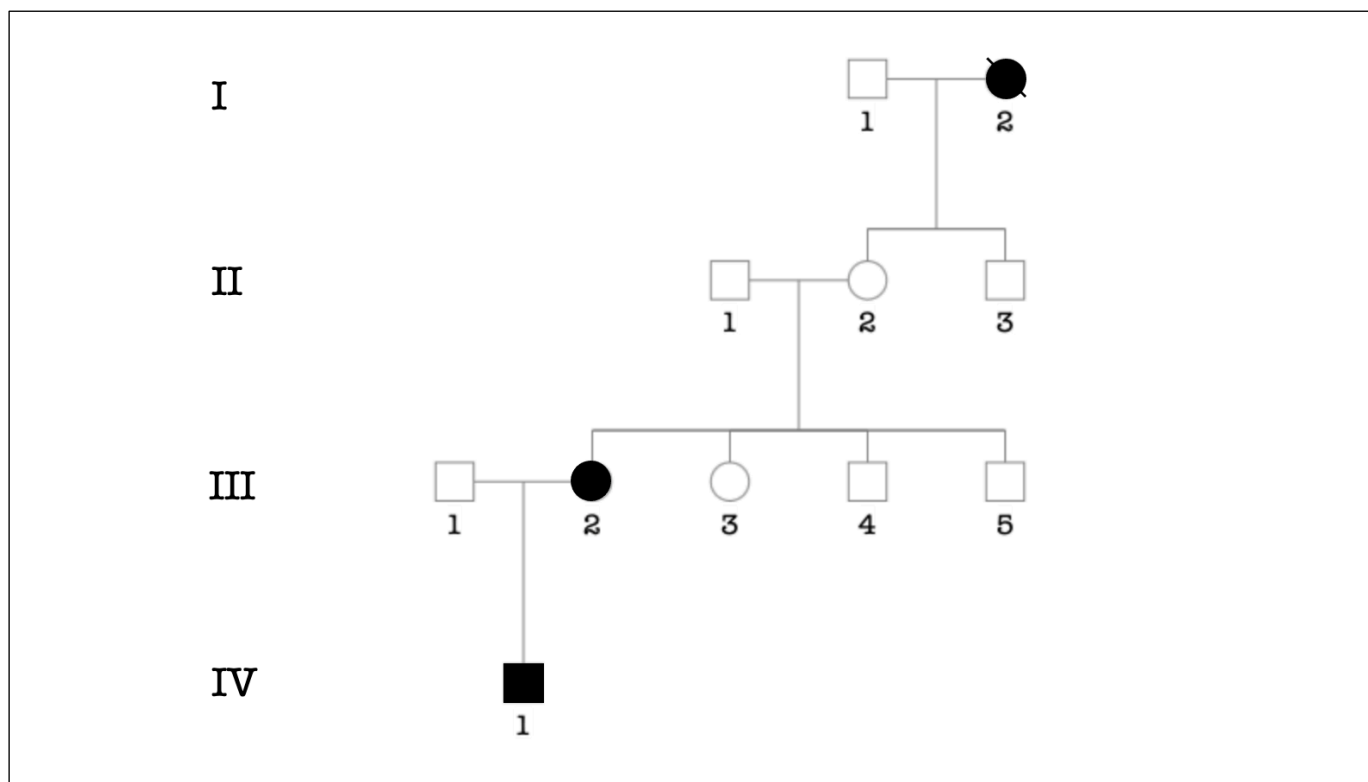

**Family77.** Pedigree showing three affected individuals segregating autosomal dominant non-syndromic hearing impairment

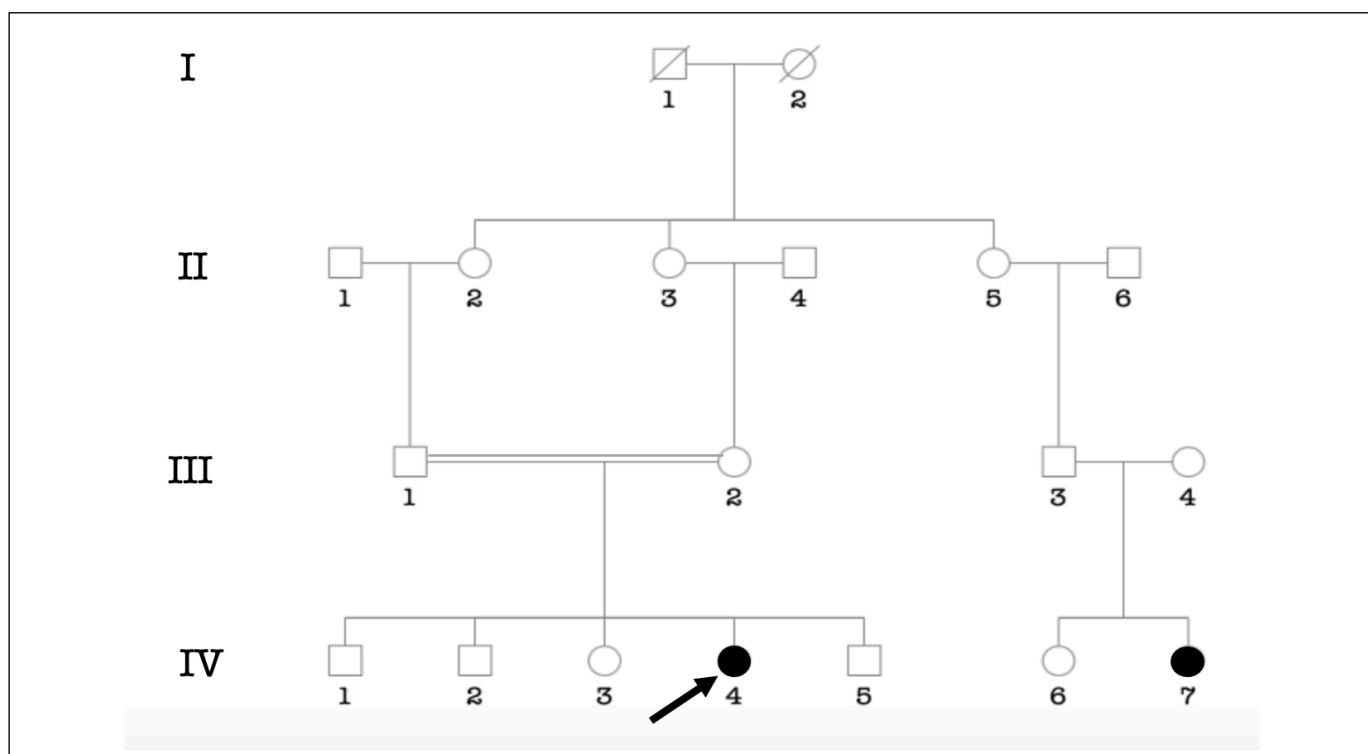

**Family78.** Pedigree showing two affected girls segregating autosomal recessive non-syndromic hearing impairment



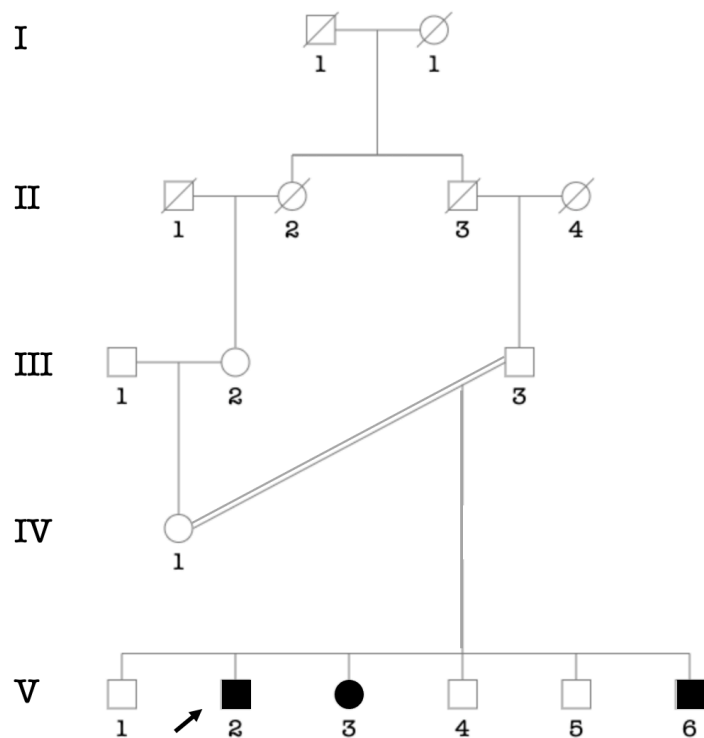

**Family79.** Pedigree showing three affected individuals from a consanguineous marriage segregating autosomal recessive non-syndromic hearing impairment

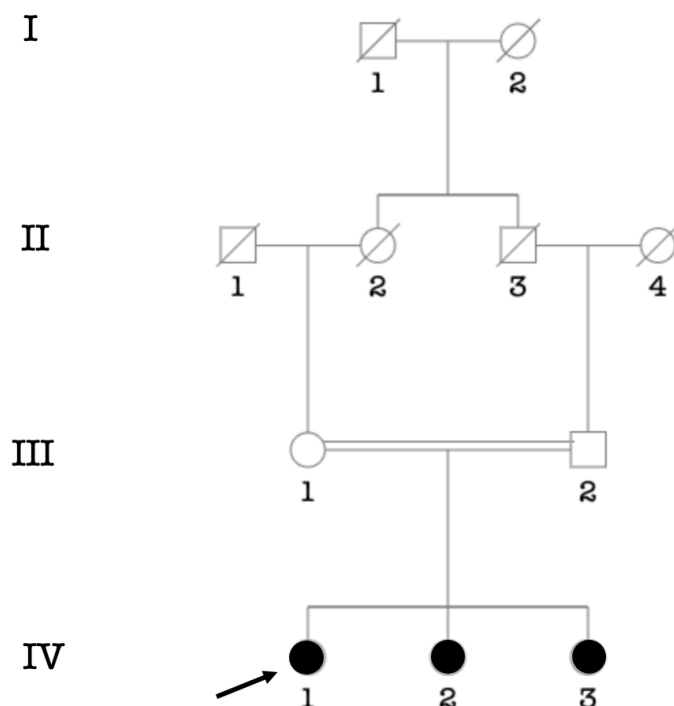

**Family80.** Pedigree showing three affected individuals from a consanguineous marriage segregating autosomal recessive non-syndromic hearing impairment

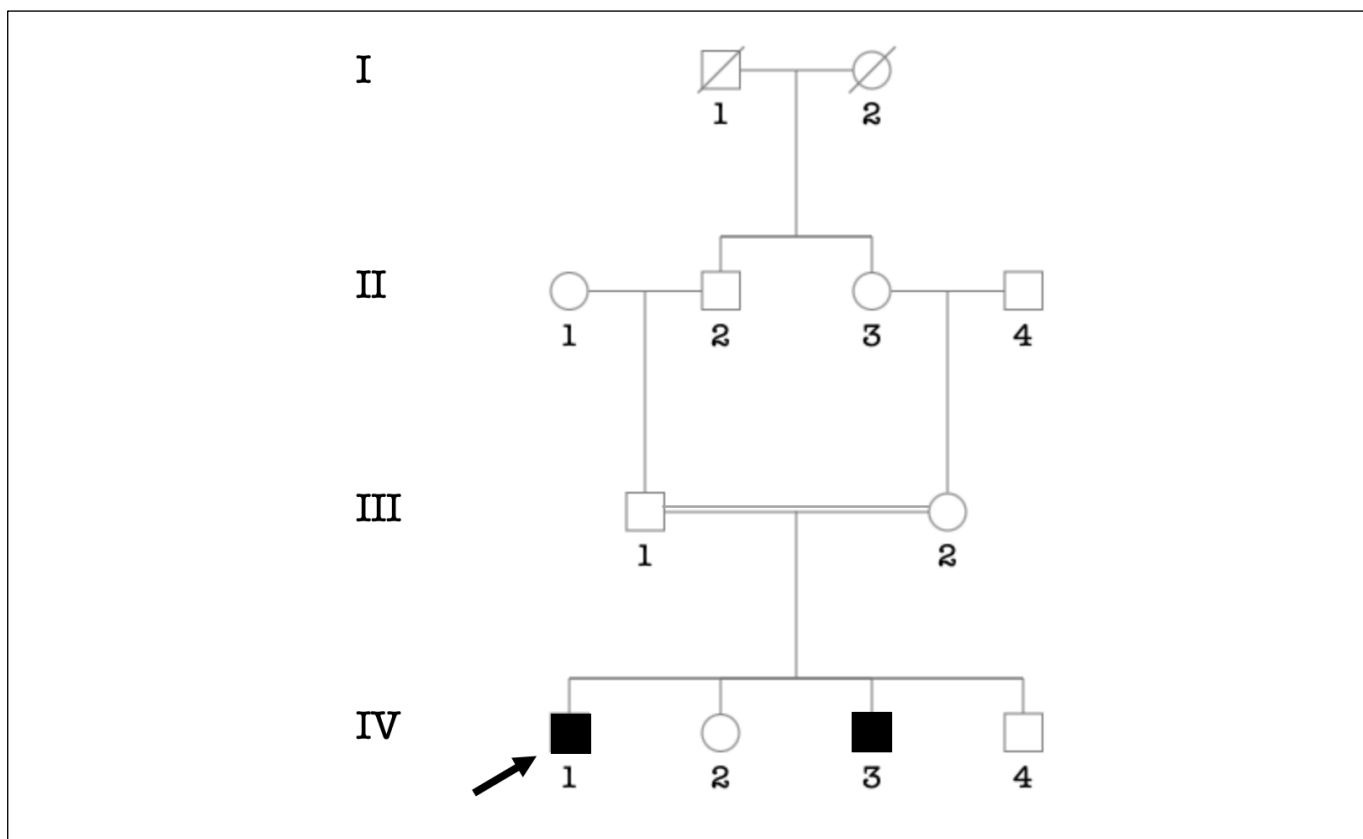

**Family81.** Pedigree showing two affected boys from a consanguineous marriage segregating autosomal recessive non-syndromic hearing impairment

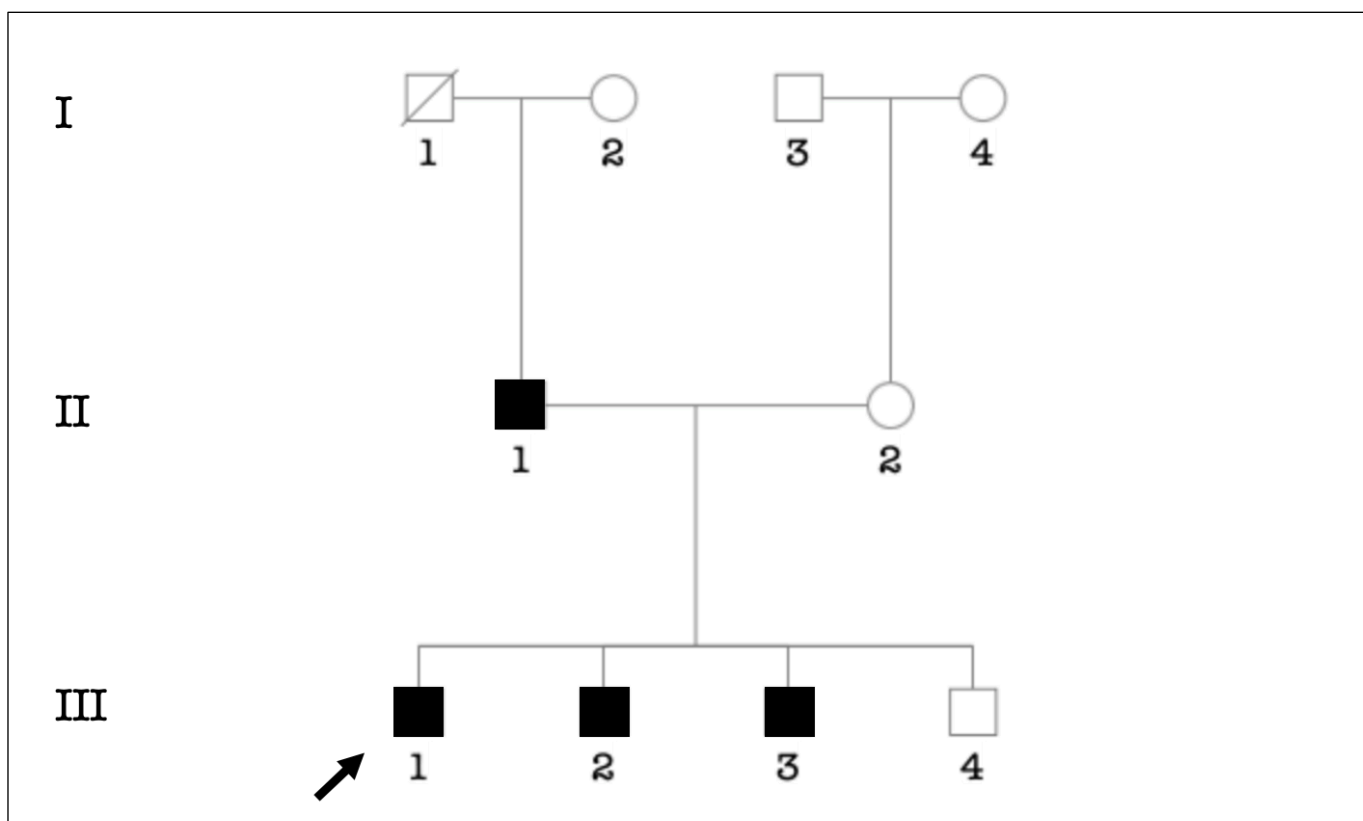

**Family82.** Pedigree showing four affected individuals segregating autosomal recessive non-syndromic hearing impairment

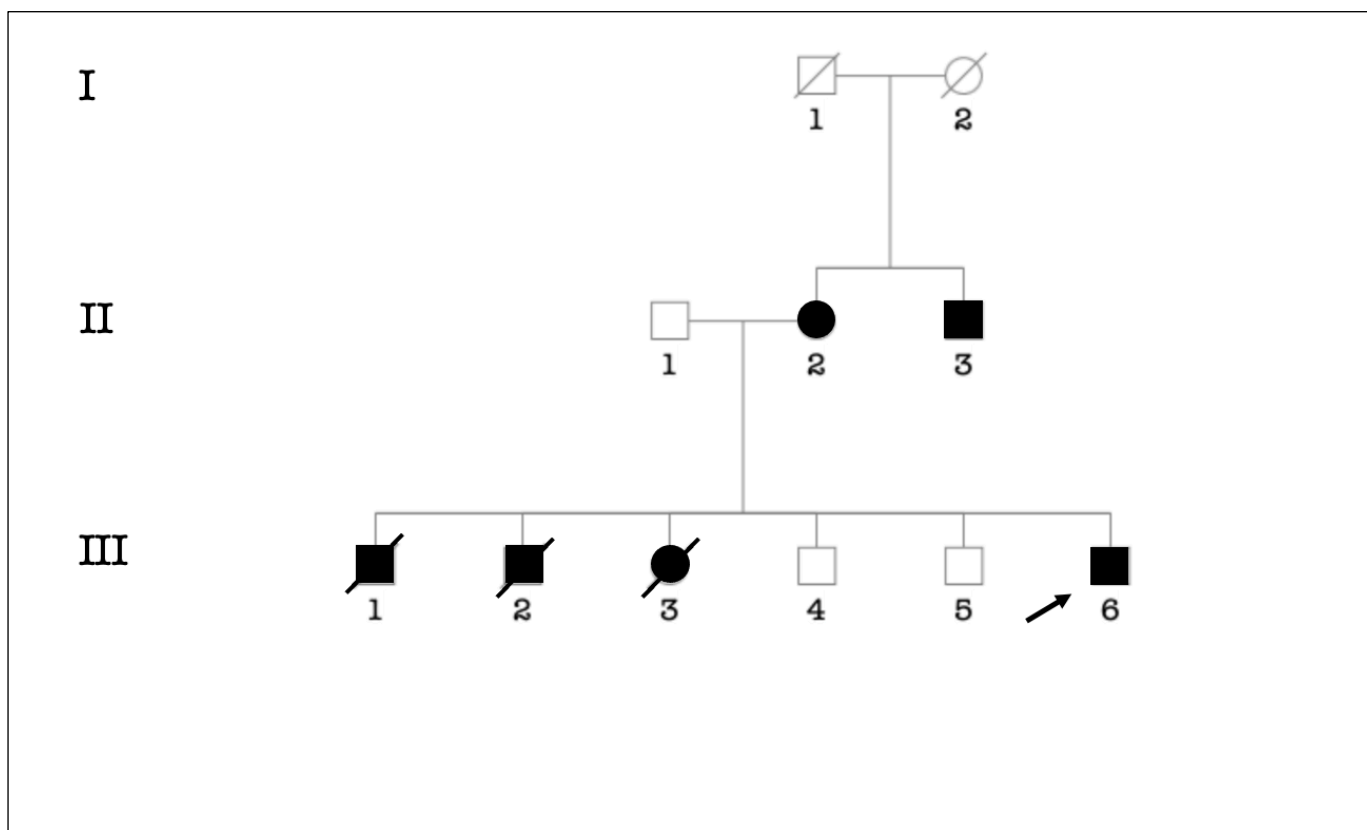

**Family83.** Pedigree showing six affected individuals segregating Alport syndrome, (Dominant X-linked).

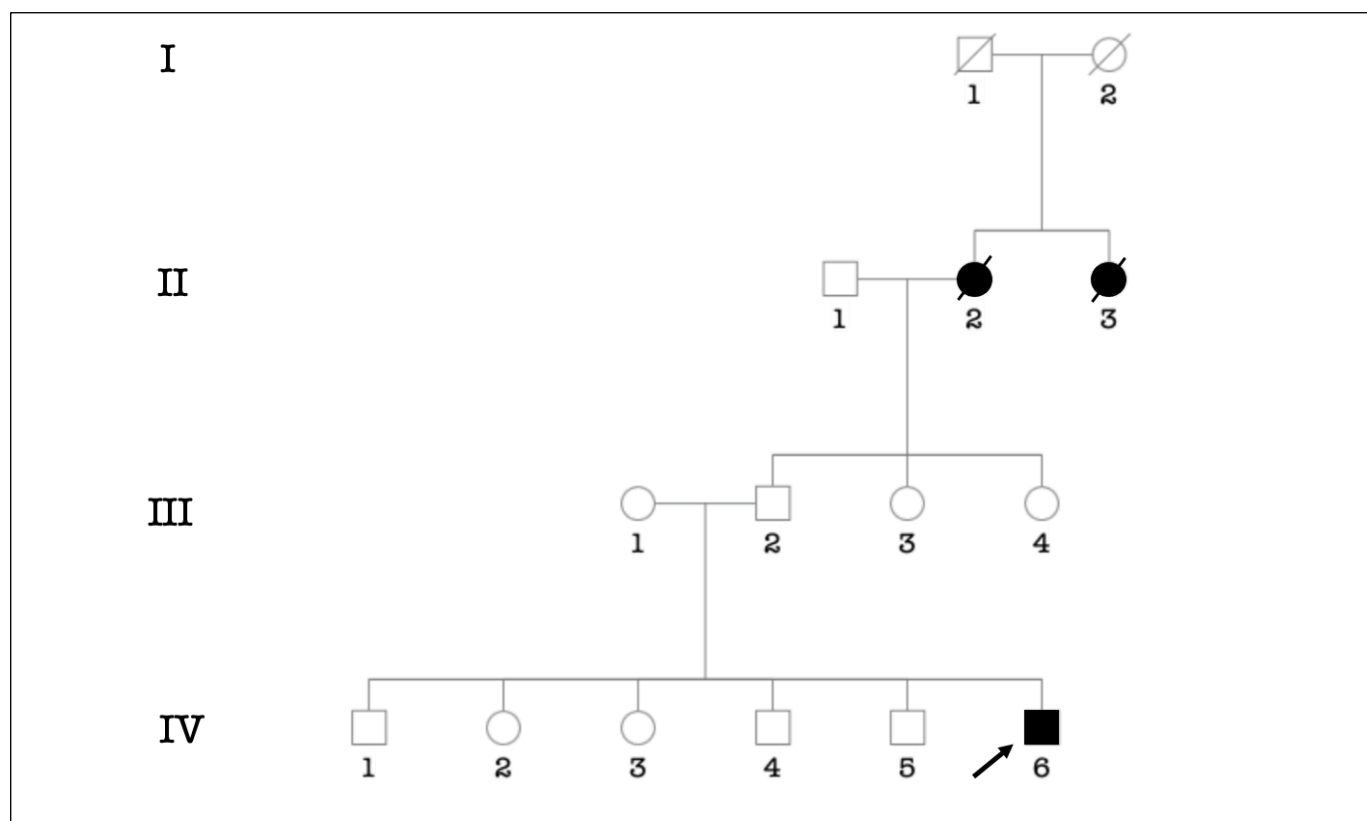

**Family84.** Pedigree showing a proband indicates by an arrow with non-syndromic hearing impairment

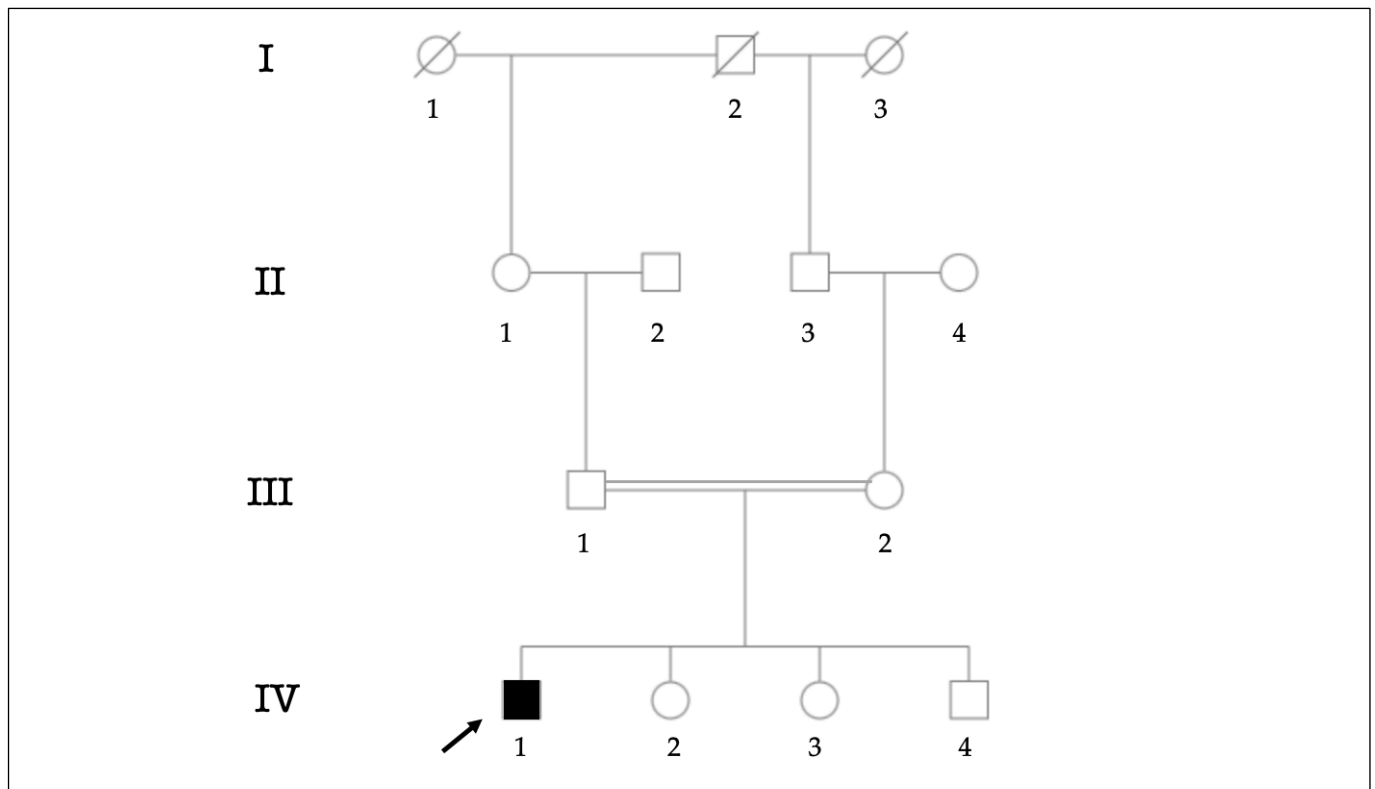

**Family85.** Pedigree showing a proband indicates by an arrow with non-syndromic hearing impairment

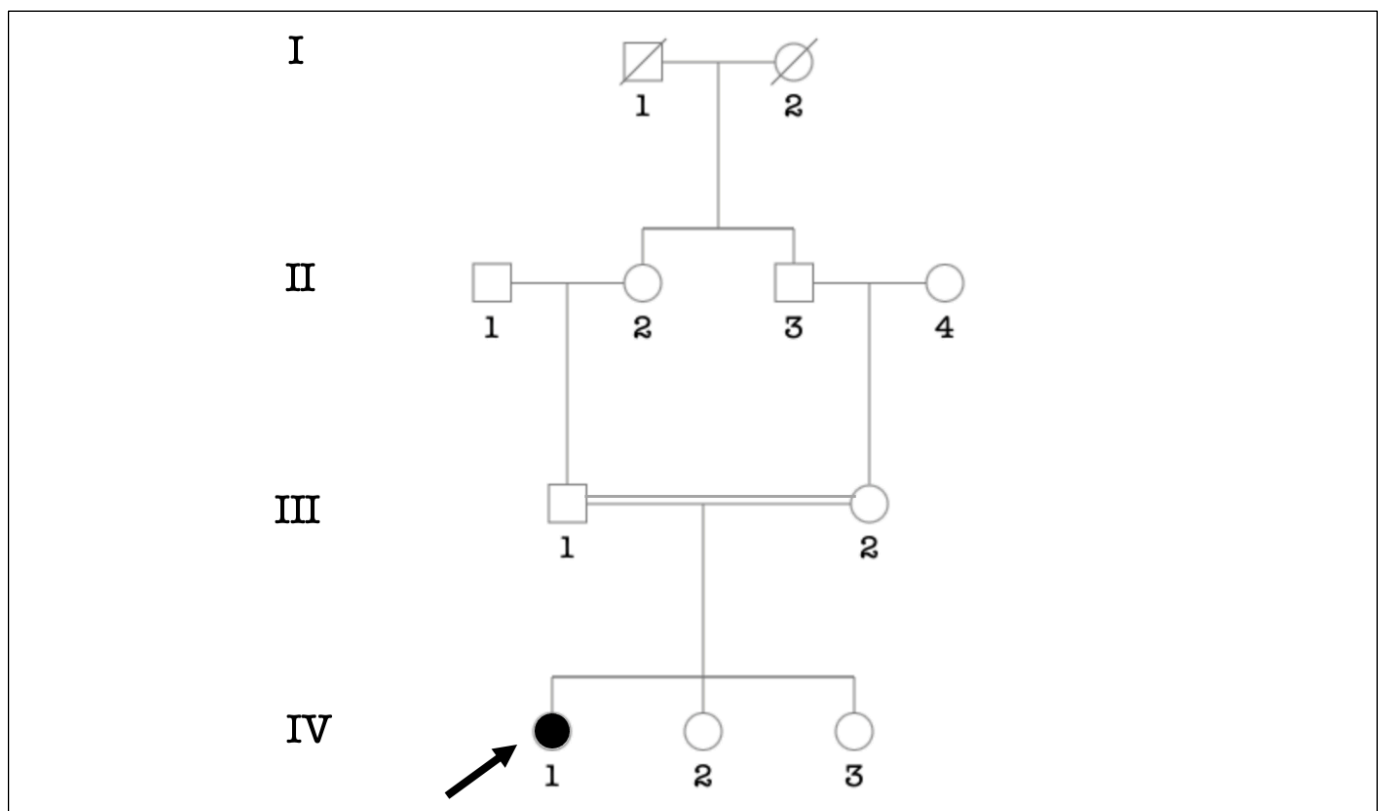

**Family86.** Pedigree showing a proband indicates by an arrow with non-syndromic hearing impairment

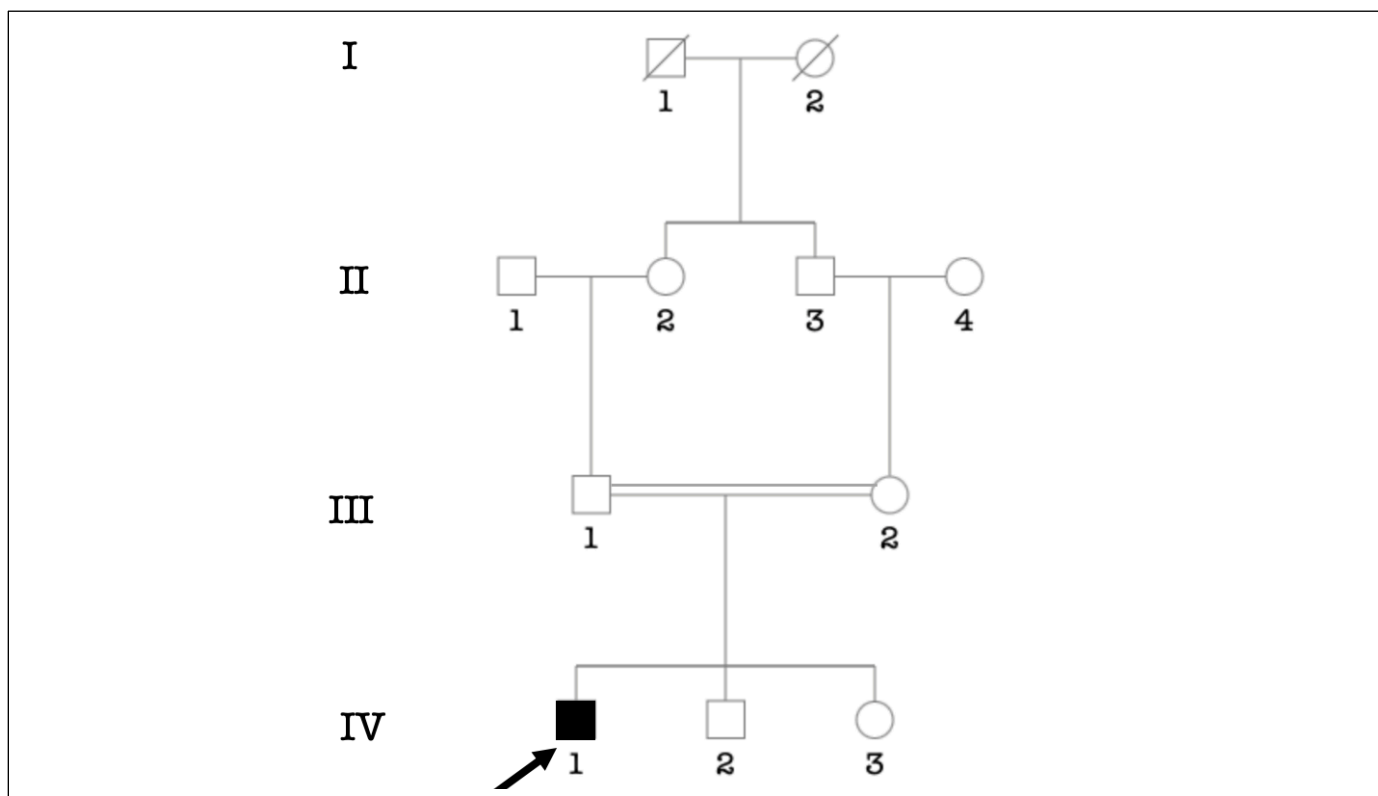

**Family87.** Pedigree showing a proband indicates by an arrow with non-syndromic hearing impairment

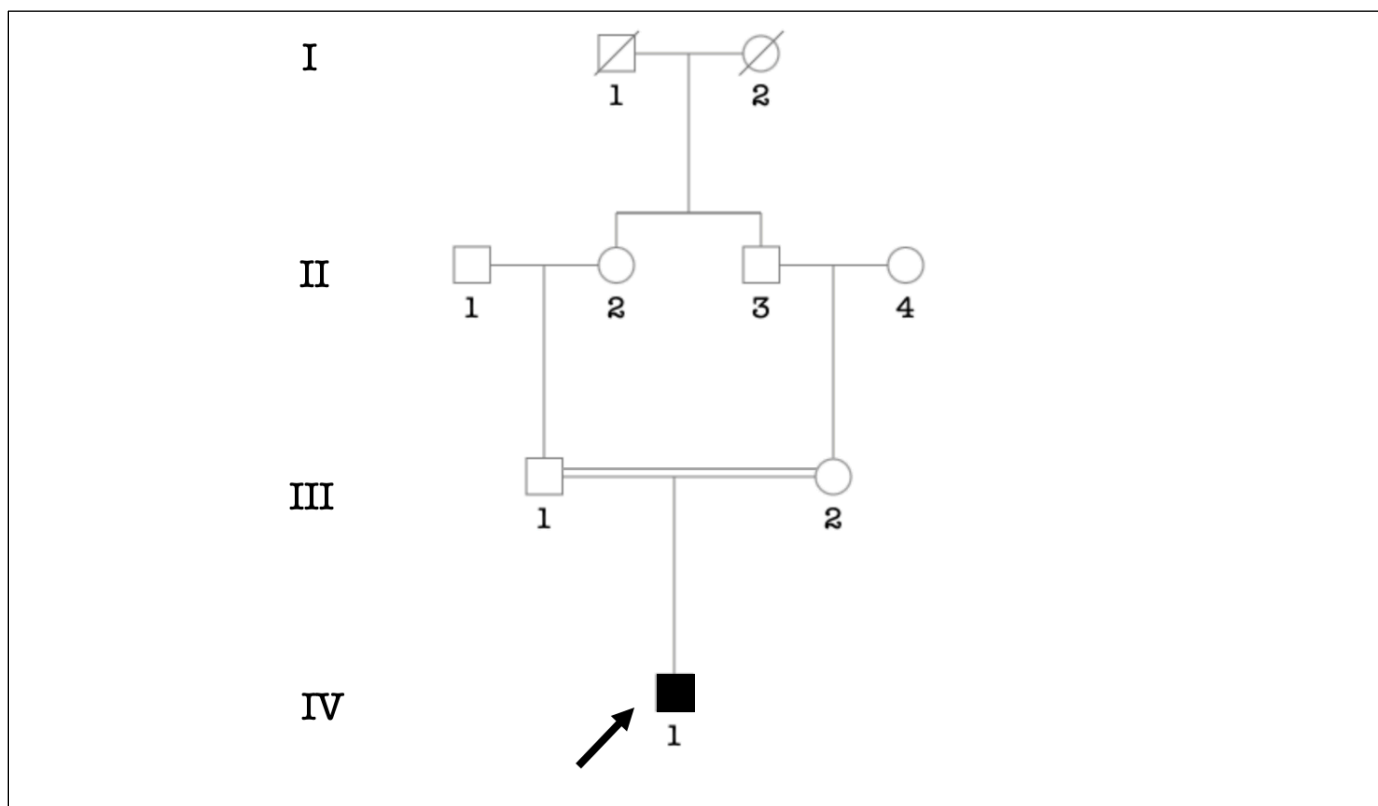

**Family88.** Pedigree showing a proband indicates by an arrow with non-syndromic hearing impairment

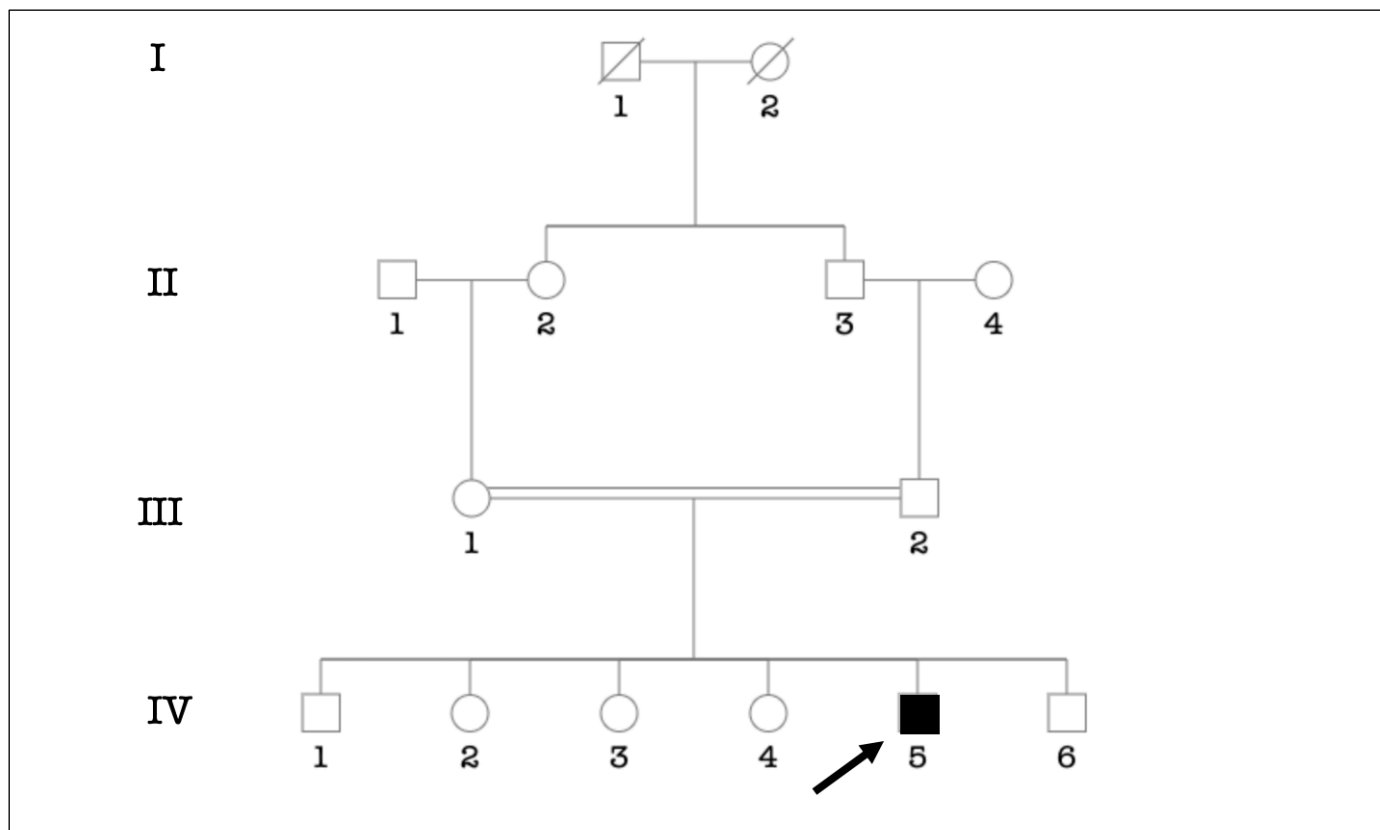

**Family89.** Pedigree showing a proband indicates by an arrow with non-syndromic hearing impairment

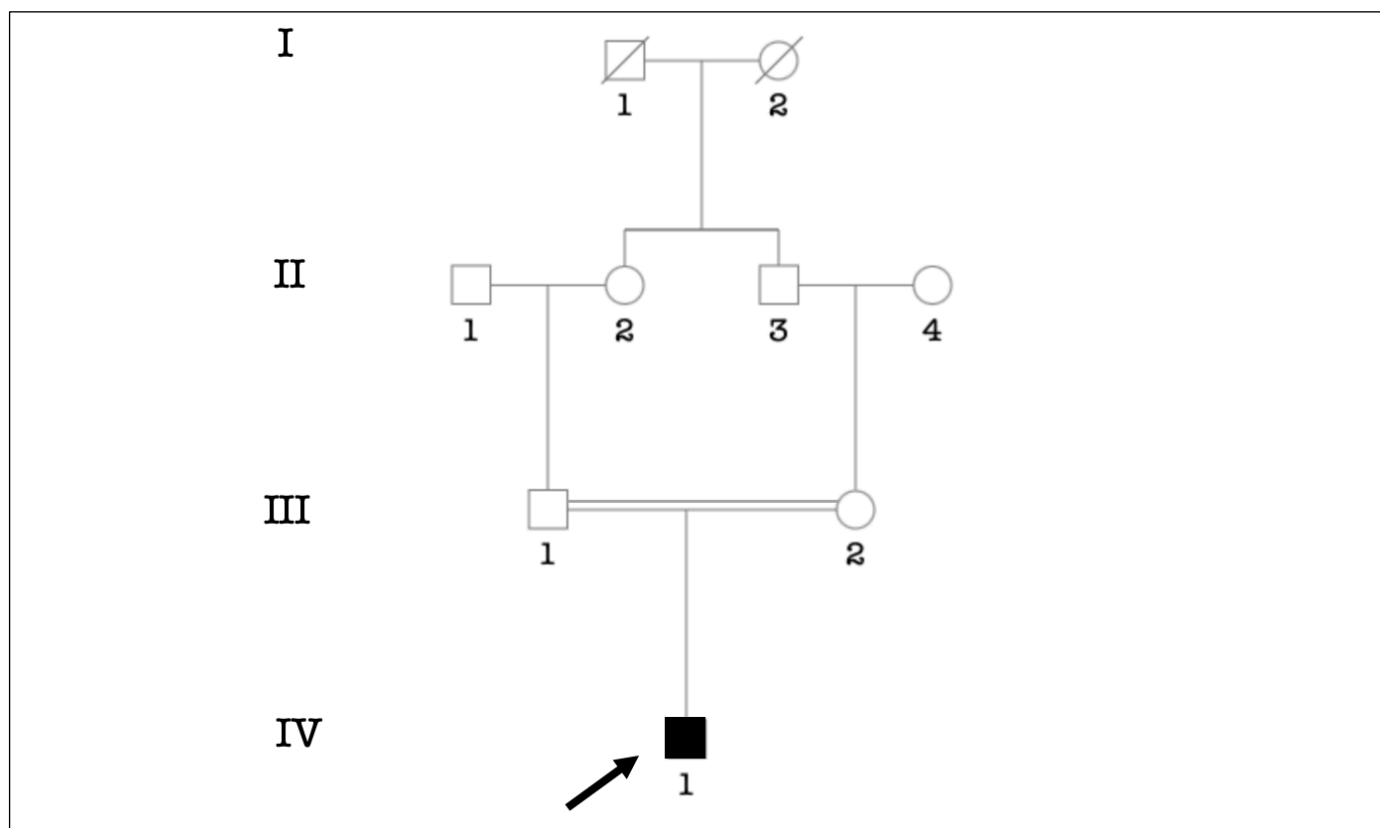

**Family90.** Pedigree showing a proband indicates by an arrow with non-syndromic hearing impairment

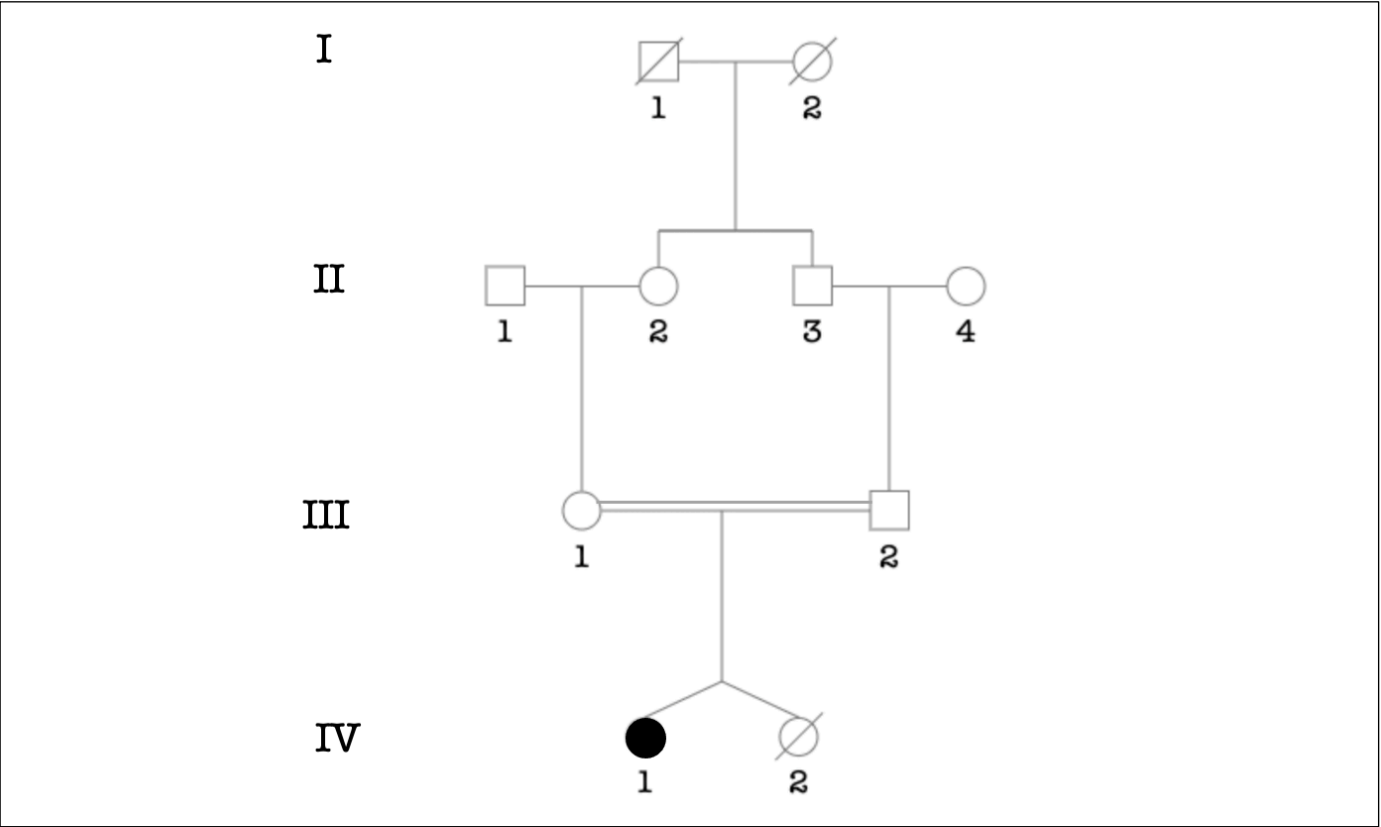

**Family91.** Pedigree showing a proband indicates by an arrow with non-syndromic hearing impairment

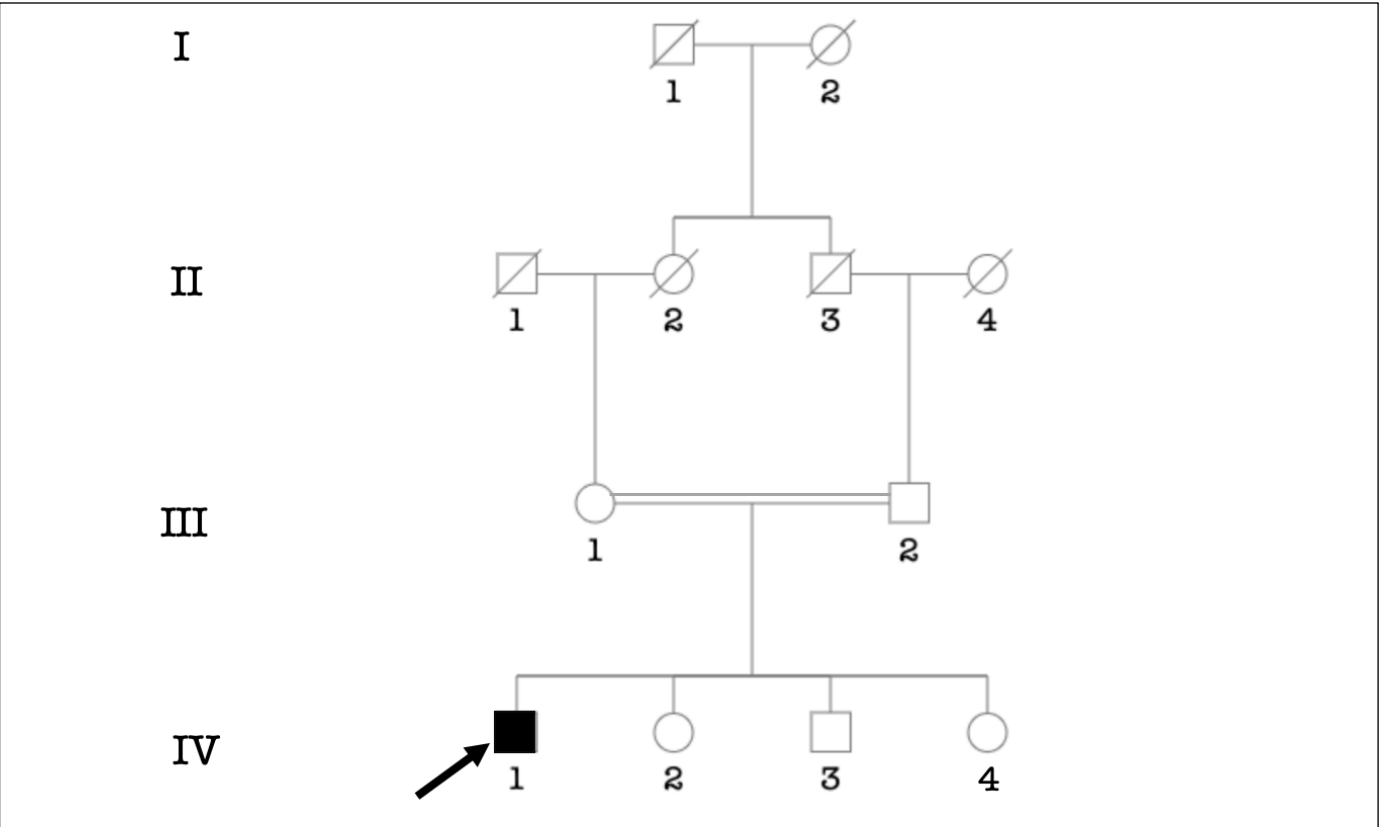

**Family92.** Pedigree showing a proband indicates by an arrow with non-syndromic hearing impairment

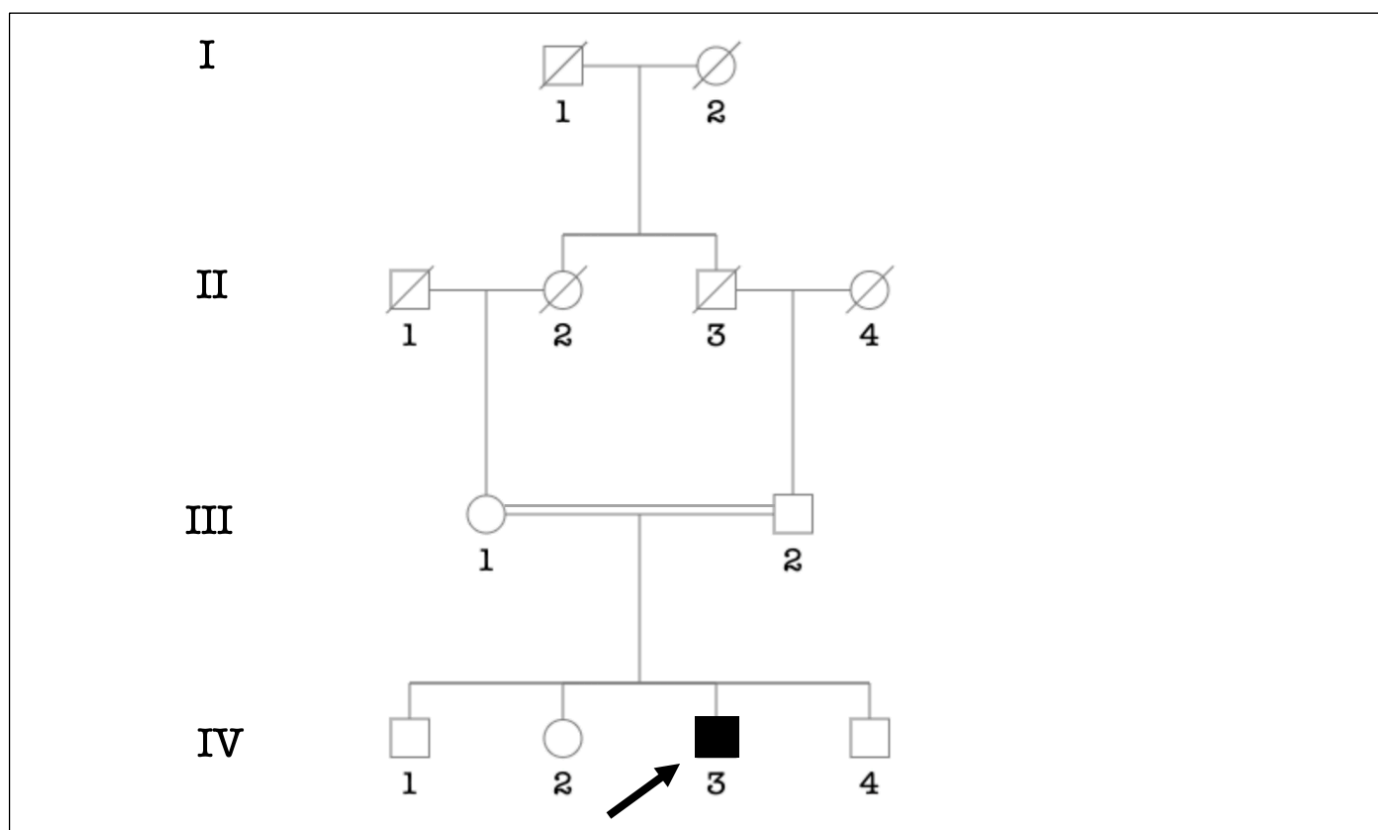

**Family93.** Pedigree showing a proband indicates by an arrow with non-syndromic hearing impairment

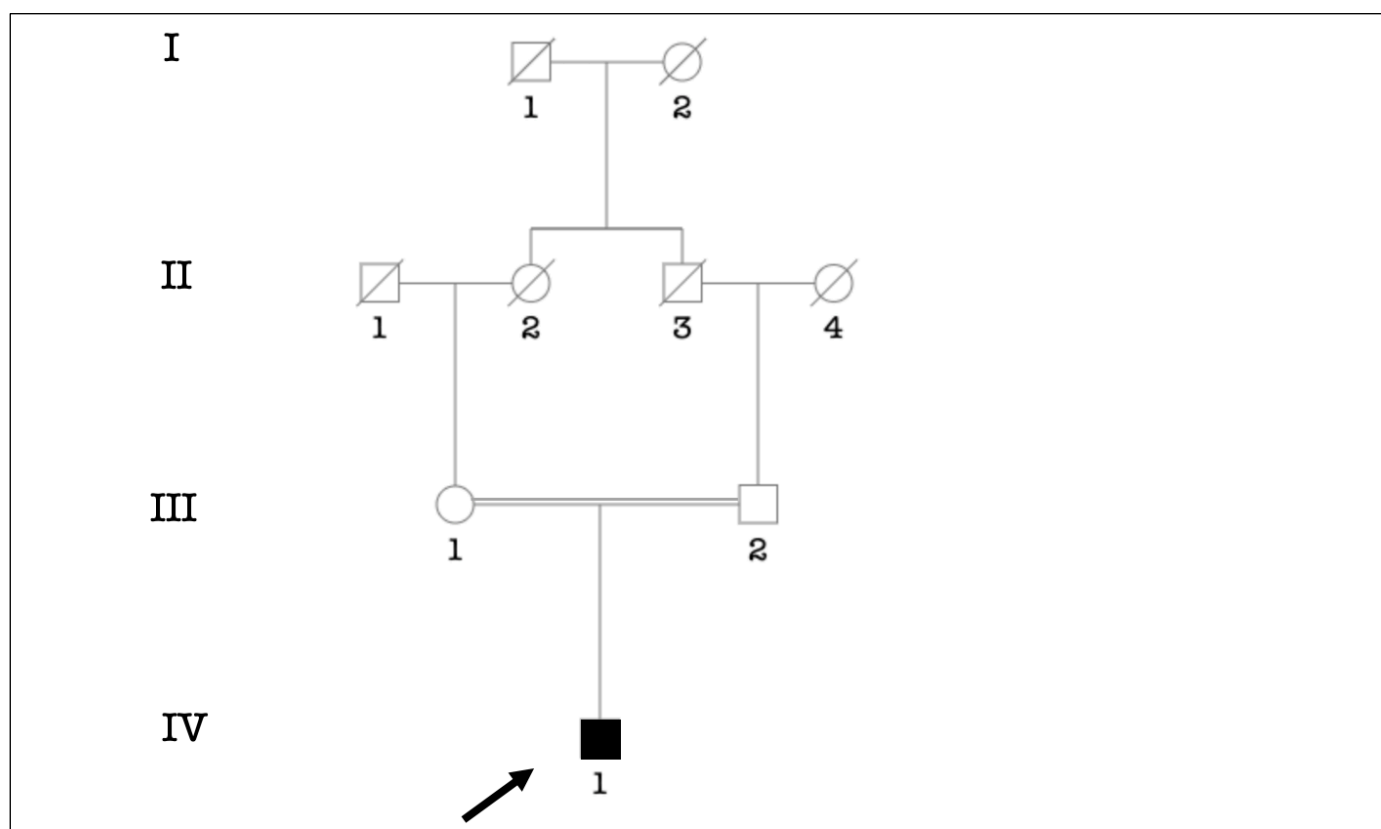

**Family94.** Pedigree showing a proband indicates by an arrow with non-syndromic hearing impairment



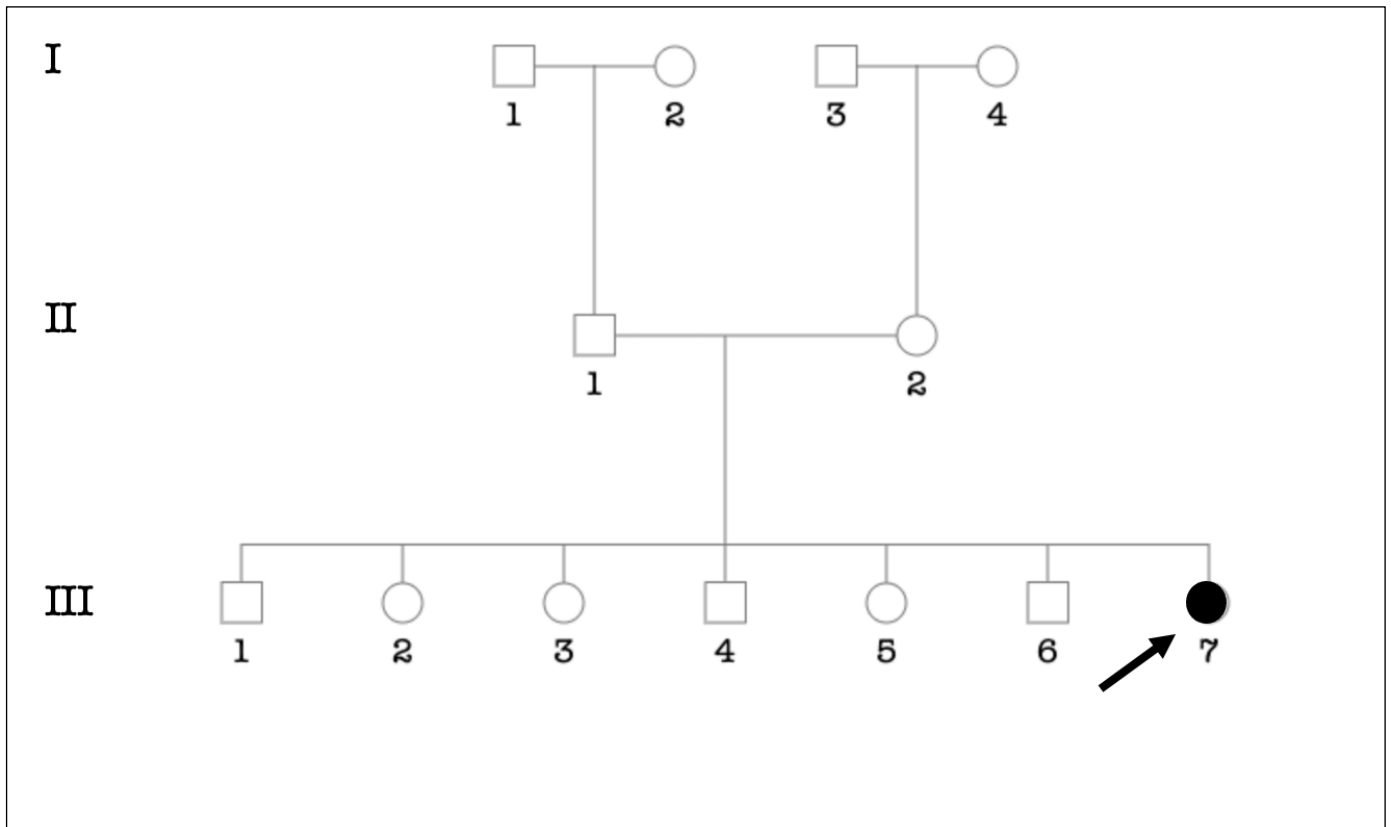

**Family95.** Pedigree showing a proband indicates by an arrow with Down's syndrome

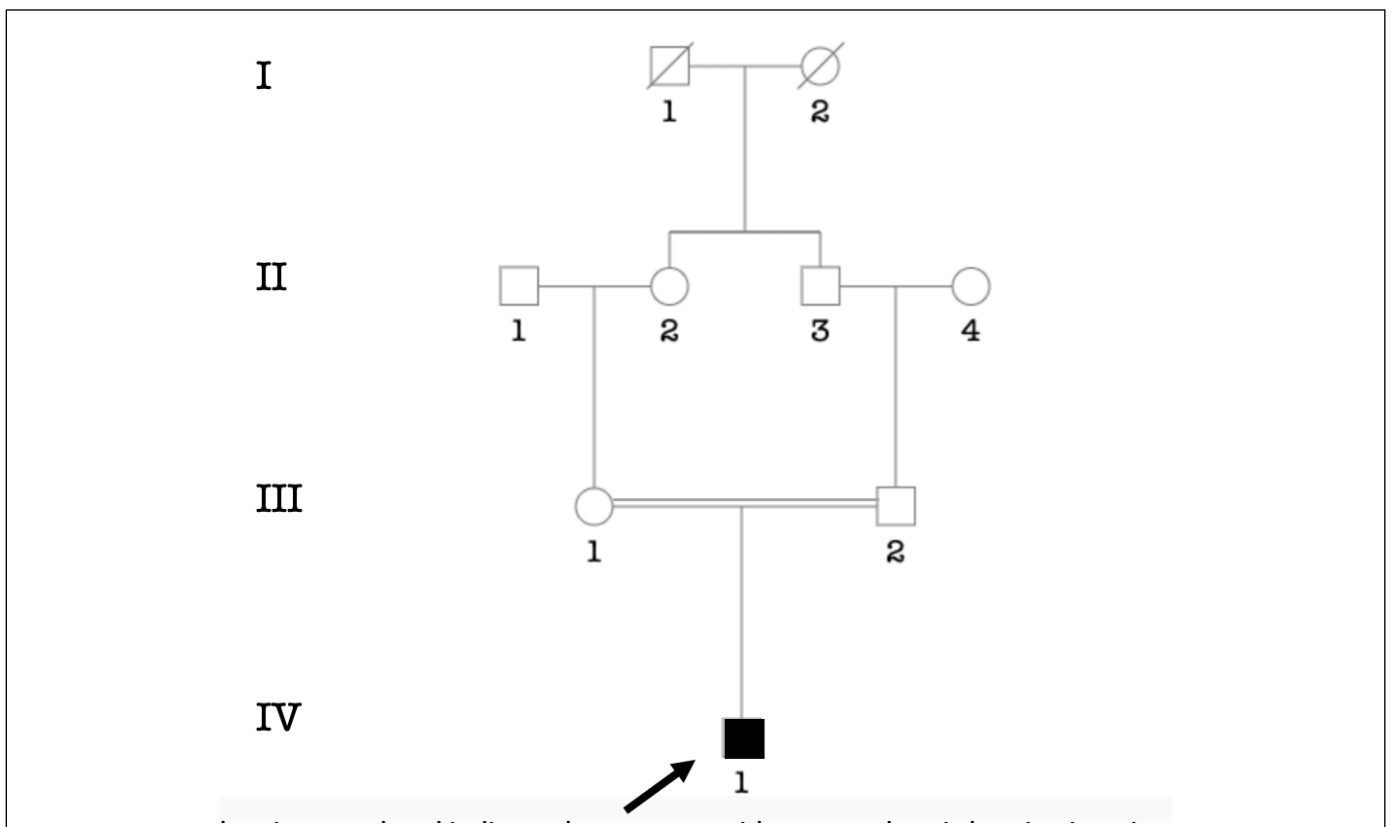

**Family96.** Pedigree showing a proband indicates by an arrow with non-syndromic hearing impairment

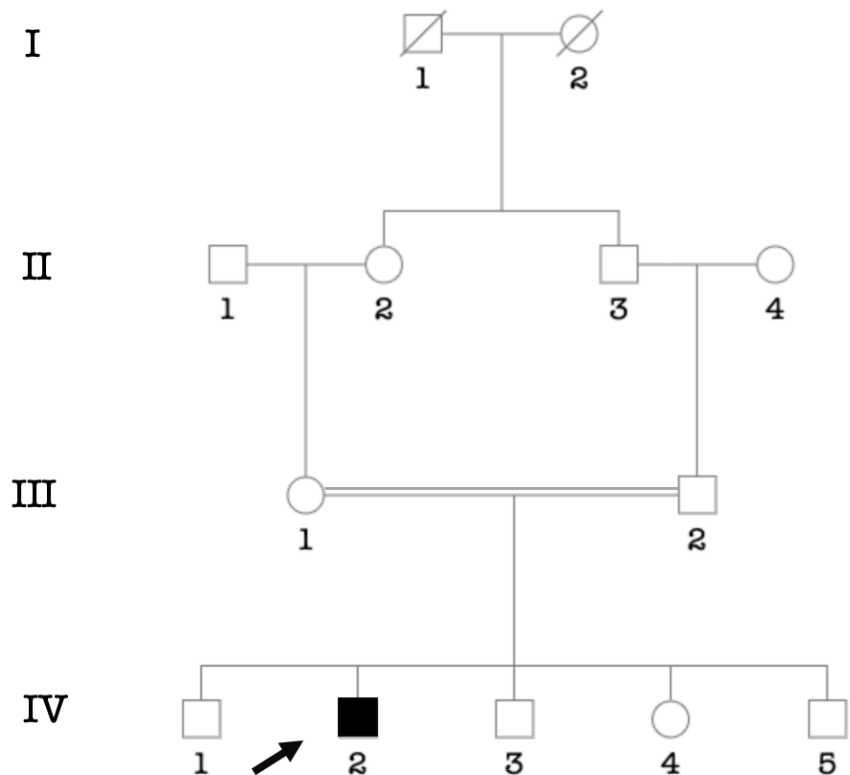

**Family97.** Pedigree showing a proband indicates by an arrow with non-syndromic hearing impairment

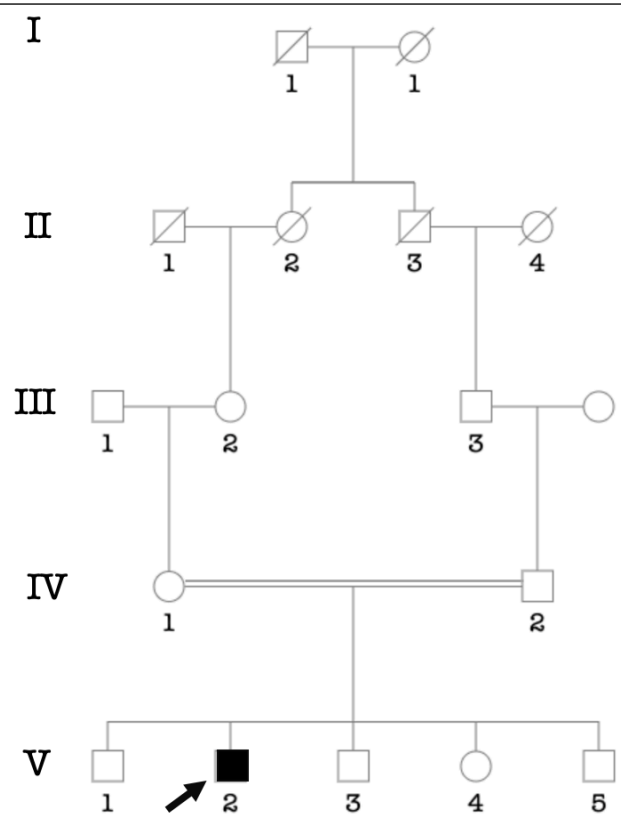

**Family98.** Pedigree showing a proband indicates by an arrow with non-syndromic hearing impairment

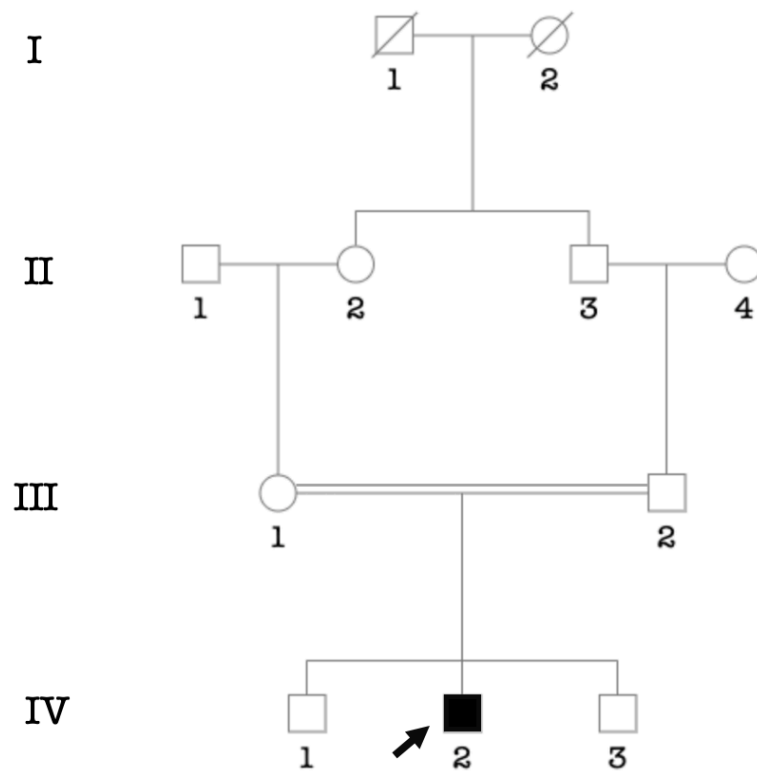

**Family99.** Pedigree showing a proband indicates by an arrow with non-syndromic hearing impairment

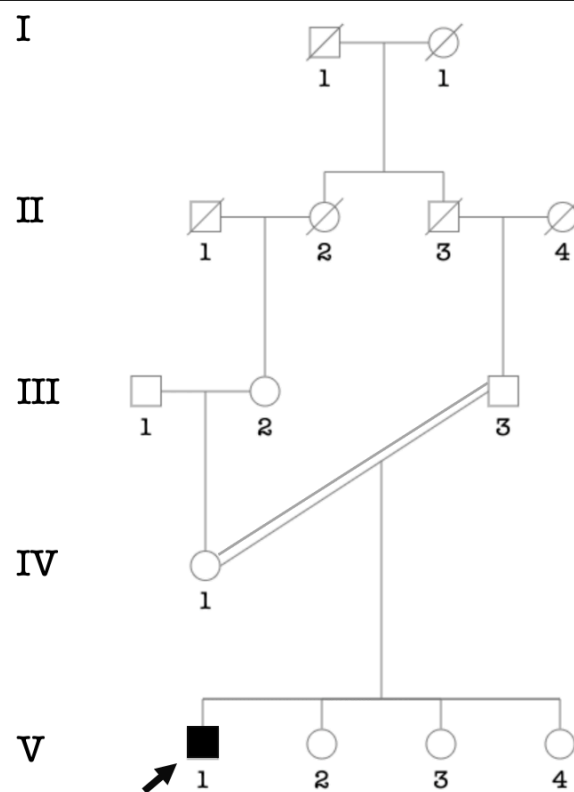

**Family100.** Pedigree showing a proband indicates by an arrow from a consanguineous marriage with non-syndromic hearing impairment

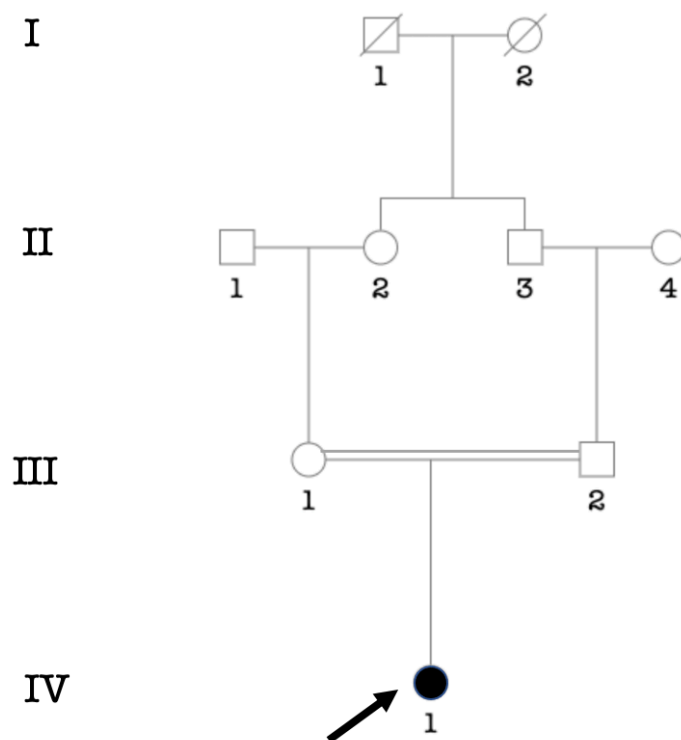

**Family101.** Pedigree showing a proband indicates by an arrow from a consanguineous marriage with non-syndromic hearing impairment

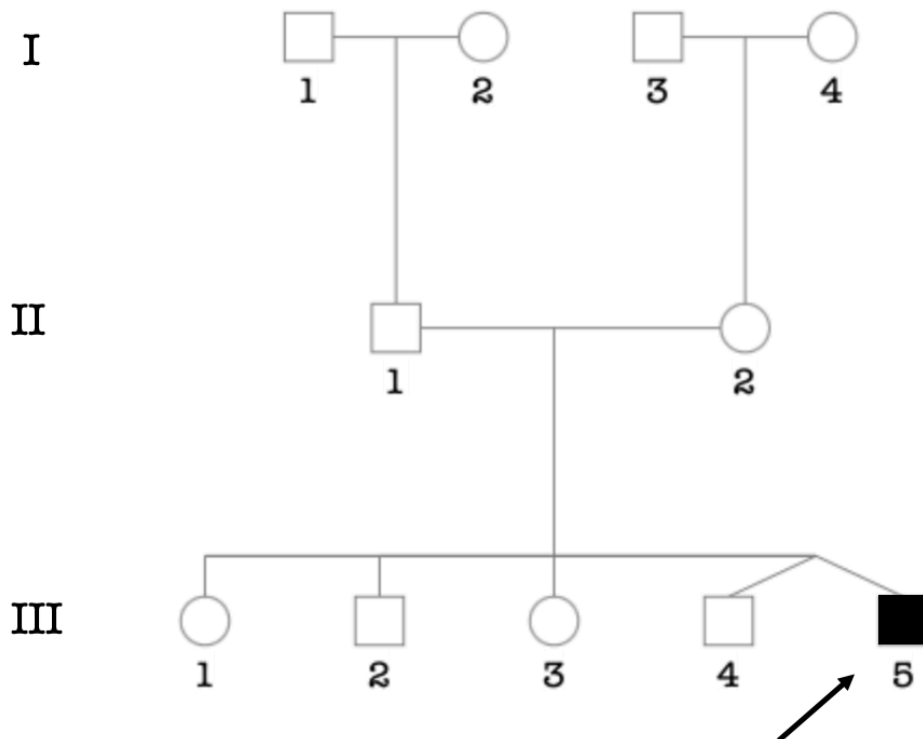

**Family102.** Pedigree showing a proband indicates by an arrow with type 2 Waardenburg syndrome

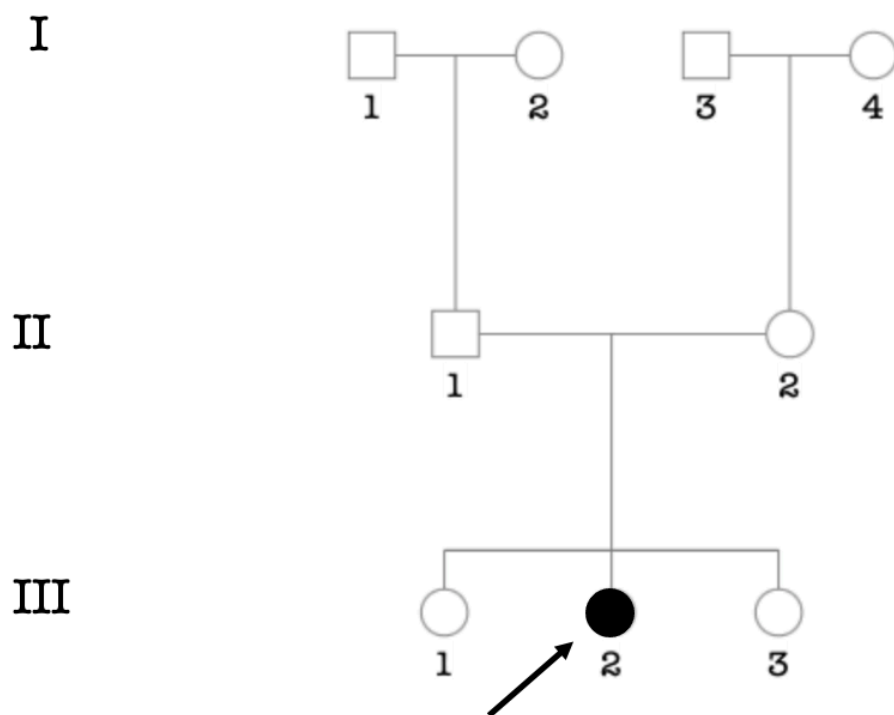

**Family103.** Pedigree showing a proband indicates by an arrow with suspected LAMM syndrome

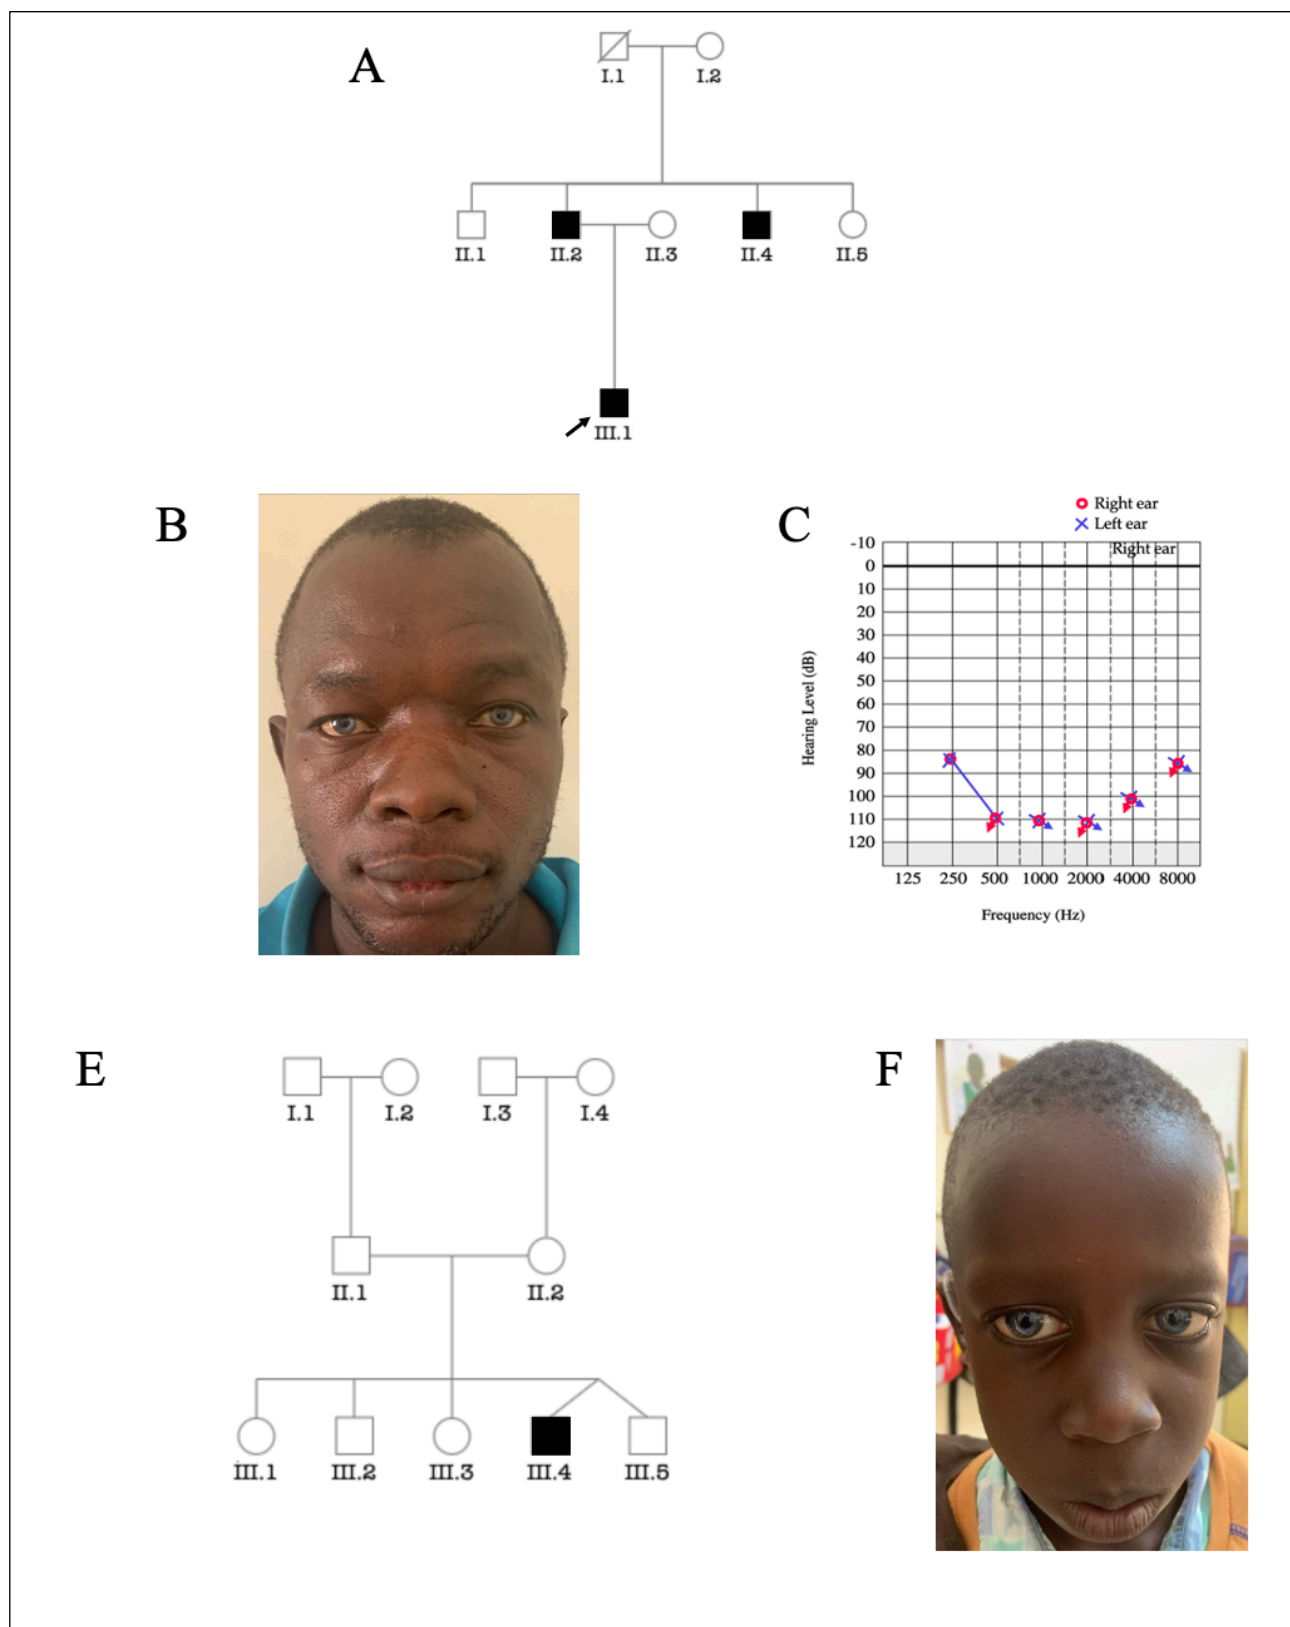

**Figure S2.** Waardenburg Syndrome type 2 in two Senegalese Families. In the first family (Panel A) the proband (III.1) as well as his father (II.2) exhibited blue sapphire eye. In addition to profound hearing impairment the proband's father showed premature white hair. In the second family (Panel E) the proband (III.4) exhibited blue sapphire eye associated with profound hearing impairment.
